# Supplementary material
Source: publisher figshare collection journal article supplement (https://gsajournals.figshare.com/ndownloader/files/15684881)
Supplement: Supplementary file 1 [file 15684881]

## Sheet: Sheet1
Table S2. Genotypic data of the F6 Rusty/PI192051 recombinant inbred lines
Marker	Marker_org	SNP	PI192051	Rusty	F6 Rusty/PI1902051-1	F6 Rusty/PI1902051-2	F6 Rusty/PI1902051-5	F6 Rusty/PI1902051-12	F6 Rusty/PI1902051-13	F6 Rusty/PI1902051-15	F6 Rusty/PI1902051-19	F6 Rusty/PI1902051-22	F6 Rusty/PI1902051-24	F6 Rusty/PI1902051-30	F6 Rusty/PI1902051-31	F6 Rusty/PI1902051-32	F6 Rusty/PI1902051-35	F6 Rusty/PI1902051-36	F6 Rusty/PI1902051-38	F6 Rusty/PI1902051-40	F6 Rusty/PI1902051-42	F6 Rusty/PI1902051-44	F6 Rusty/PI1902051-46	F6 Rusty/PI1902051-54	F6 Rusty/PI1902051-55	F6 Rusty/PI1902051-56	F6 Rusty/PI1902051-57	F6 Rusty/PI1902051-62	F6 Rusty/PI1902051-63	F6 Rusty/PI1902051-64	F6 Rusty/PI1902051-65	F6 Rusty/PI1902051-67	F6 Rusty/PI1902051-69	F6 Rusty/PI1902051-70	F6 Rusty/PI1902051-71	F6 Rusty/PI1902051-73	F6 Rusty/PI1902051-76	F6 Rusty/PI1902051-77	F6 Rusty/PI1902051-78	F6 Rusty/PI1902051-85	F6 Rusty/PI1902051-86	F6 Rusty/PI1902051-89	F6 Rusty/PI1902051-91	F6 Rusty/PI1902051-93	F6 Rusty/PI1902051-102	F6 Rusty/PI1902051-105	F6 Rusty/PI1902051-107	F6 Rusty/PI1902051-121	F6 Rusty/PI1902051-123
IWA495	wsnp_BF482403B_Ta_1_1	[T/C]	AA	BB	AA	BB	AA	AA	BB	BB	AA	BB	BB	AA	BB	AA	BB	BB	BB	BB	AA	BB	AA	BB	BB	AA	BB	BB	BB	BB	AA	AA	BB	BB	BB	AA	BB	AA	BB	AA	BB	BB	BB	AA	BB	BB	AA	AA	BB
IWA1096	wsnp_CAP7_c5487_2464794	[A/G]	AA	BB	-	BB	-	AA	BB	-	-	BB	-	BB	BB	AA	-	-	BB	BB	-	BB	BB	-	BB	BB	AA	BB	BB	BB	BB	BB	-	AA	AA	BB	AA	BB	BB	AA	-	BB	BB	-	BB	AA	BB	BB	-
IWA1342	wsnp_Ex_c10543_17223523	[T/C]	AA	BB	BB	BB	BB	AA	BB	BB	BB	BB	BB	AA	AA	AA	AA	BB	BB	BB	BB	BB	AA	BB	BB	BB	AA	BB	AA	AA	AA	BB	BB	AA	AA	AA	AA	BB	AA	BB	BB	BB	BB	AA	BB	AA	AA	BB	BB
IWA1436	wsnp_Ex_c11106_18002976	[T/C]	AA	BB	BB	BB	BB	AA	AA	BB	AA	AA	AA	AA	AA	AA	BB	AA	AA	AA	AA	AA	AA	BB	BB	BB	AA	BB	BB	AA	BB	AA	BB	AA	BB	AA	BB	AA	BB	AA	BB	BB	BB	BB	AA	BB	BB	BB	BB
IWA1438	wsnp_Ex_c11106_18003546	[T/G]	AA	BB	BB	-	BB	AA	AA	BB	AA	AA	AA	AA	AA	AA	BB	AA	AA	AA	AA	AA	AA	BB	BB	BB	AA	BB	BB	AA	BB	AA	BB	AA	BB	AA	BB	AA	BB	AA	BB	BB	BB	BB	AA	BB	BB	BB	BB
IWA1442	wsnp_Ex_c11131_18036912	[A/G]	AA	BB	BB	BB	AA	BB	BB	AA	AA	AA	AA	BB	AA	BB	AA	BB	BB	BB	BB	BB	BB	BB	AA	AA	AA	AA	AA	AA	AA	AA	BB	BB	AA	AA	AA	BB	AA	AA	AA	BB	BB	BB	BB	AA	AA	BB	AA
IWA1461	wsnp_Ex_c11275_18229524	[T/C]	AA	BB	BB	BB	BB	AA	BB	BB	BB	BB	BB	AA	AA	AA	AA	BB	BB	BB	BB	BB	AA	AA	BB	BB	AA	BB	AA	AA	AA	BB	BB	AA	AA	AA	AA	BB	AA	BB	BB	BB	BB	AA	BB	AA	AA	BB	BB
IWA1491	wsnp_Ex_c11417_18429357	[T/C]	AA	BB	AA	BB	BB	AA	BB	BB	AA	BB	BB	BB	BB	AA	AA	AA	BB	AA	AA	AA	BB	AA	AA	BB	BB	BB	BB	AA	BB	AA	BB	BB	BB	AA	AA	AA	BB	BB	AA	BB	AA	AA	BB	AA	BB	BB	AA
IWA1558	wsnp_Ex_c11939_19147514	[A/G]	AA	BB	BB	AA	AA	BB	AA	BB	BB	AA	BB	BB	AA	AA	BB	BB	AA	BB	BB	BB	BB	AA	AA	BB	AA	AA	AA	BB	BB	AA	BB	AA	BB	BB	AA	AA	BB	BB	AA	BB	BB	BB	BB	BB	BB	BB	BB
IWA1641	wsnp_Ex_c12526_19951640	[T/C]	AA	BB	AA	AA	BB	AA	AA	BB	BB	BB	BB	AA	BB	BB	AA	BB	BB	BB	AA	BB	BB	AA	BB	BB	BB	BB	BB	BB	AA	BB	BB	BB	BB	BB	BB	BB	AA	AA	AA	AA	BB	BB	AA	BB	AA	BB	BB
IWA1647	wsnp_Ex_c12556_19991329	[T/C]	AA	BB	BB	AA	BB	BB	AA	AA	BB	-	BB	AA	BB	BB	AA	AA	AA	AA	BB	BB	AA	AA	AA	BB	BB	BB	AA	AA	BB	BB	AA	AA	BB	AA	AA	AA	BB	BB	BB	BB	BB	BB	BB	BB	BB	AA	BB
IWA1648	wsnp_Ex_c12556_19991708	[A/C]	AA	BB	BB	AA	BB	BB	AA	AA	BB	AA	BB	AA	BB	BB	AA	AA	AA	AA	BB	BB	AA	AA	AA	BB	BB	BB	AA	AA	BB	BB	AA	AA	BB	AA	AA	AA	BB	BB	BB	BB	BB	BB	BB	-	BB	AA	BB
IWA1667	wsnp_Ex_c12675_20144479	[T/C]	AA	BB	BB	BB	BB	AA	AA	BB	AA	AA	BB	BB	BB	BB	AA	AA	AA	BB	AA	AA	AA	BB	BB	AA	AA	AA	BB	AA	BB	AA	BB	BB	AA	BB	BB	AA	AA	BB	AA	BB	AA	BB	BB	AA	AA	AA	AA
IWA1671	wsnp_Ex_c1269_2435294	[T/G]	AA	BB	AA	AA	BB	AA	AA	AA	AA	BB	AA	AA	AA	AA	AA	BB	AA	BB	AA	AA	BB	AA	BB	AA	BB	AA	BB	AA	BB	BB	BB	AA	BB	AA	BB	AA	AA	AA	BB	AA	AA	AA	AA	AA	BB	AA	BB
IWA1774	wsnp_Ex_c1343_2568829	[T/C]	AA	BB	BB	BB	BB	BB	BB	BB	BB	BB	AA	BB	AA	BB	AA	BB	BB	BB	BB	BB	BB	BB	AA	AA	AA	AA	AA	BB	AA	AA	BB	BB	AA	AA	-	BB	AA	AA	AA	BB	BB	BB	BB	AA	AA	BB	AA
IWA1838	wsnp_Ex_c1398_2676484	[T/C]	AA	BB	BB	BB	BB	BB	AA	BB	BB	BB	BB	BB	BB	BB	BB	BB	BB	AA	BB	BB	BB	BB	BB	BB	BB	BB	BB	BB	BB	BB	BB	BB	BB	BB	BB	BB	AA	BB	BB	BB	AA	BB	BB	BB	BB	BB	BB
IWA1866	wsnp_Ex_c14156_22088518	[A/G]	AA	BB	BB	BB	AA	AA	BB	BB	BB	BB	AA	BB	BB	AA	BB	AA	BB	BB	AA	BB	BB	AA	BB	BB	AA	BB	BB	BB	BB	BB	AA	AA	AA	BB	AA	BB	BB	AA	AA	BB	BB	BB	BB	AA	BB	BB	AA
IWA1910	wsnp_Ex_c1457_2794331	[A/C]	AA	BB	AA	AA	BB	AA	AA	BB	BB	BB	BB	AA	BB	BB	AA	BB	BB	BB	AA	BB	BB	AA	BB	BB	BB	BB	BB	AA	AA	BB	BB	BB	BB	BB	BB	BB	AA	AA	AA	AA	BB	BB	AA	BB	AA	BB	BB
IWA1920	wsnp_Ex_c14654_22713386	[T/C]	AA	BB	BB	AA	BB	BB	BB	AA	AA	AA	BB	BB	AA	BB	AA	BB	AA	AA	BB	BB	AA	BB	AA	BB	BB	AA	AA	BB	BB	AA	AA	BB	BB	AA	AA	AA	BB	BB	AA	AA	AA	BB	AA	AA	BB	AA	BB
IWA2011	wsnp_Ex_c15341_23592075	[A/G]	AA	BB	BB	BB	BB	AA	BB	BB	AA	BB	BB	BB	AA	AA	AA	AA	BB	AA	AA	AA	AA	AA	AA	BB	BB	-	BB	BB	BB	AA	BB	AA	BB	AA	AA	BB	BB	BB	BB	BB	AA	AA	BB	AA	BB	BB	AA
IWA2014	wsnp_Ex_c15342_23592789	[A/C]	AA	BB	AA	BB	AA	BB	BB	AA	AA	AA	AA	AA	AA	AA	BB	BB	AA	BB	BB	AA	BB	BB	BB	AA	BB	BB	AA	AA	AA	-	AA	AA	AA	BB	AA	BB	AA	BB	AA	AA	BB	AA	AA	AA	BB	BB	BB
IWA2031	wsnp_Ex_c15490_23776560	[T/G]	AA	BB	AA	BB	BB	AA	AA	AA	BB	AA	BB	BB	BB	BB	AA	BB	AA	AA	AA	BB	BB	AA	AA	BB	BB	BB	BB	BB	AA	AA	BB	BB	BB	BB	BB	AA	BB	-	AA	AA	BB	BB	AA	AA	AA	BB	AA
IWA2063	wsnp_Ex_c15795_24169367	[T/G]	AA	BB	AA	BB	BB	BB	BB	BB	BB	BB	BB	BB	BB	AA	BB	BB	BB	BB	AA	AA	BB	AA	BB	AA	BB	AA	BB	AA	BB	BB	BB	BB	AA	BB	BB	AA	BB	BB	AA	BB	BB	BB	BB	AA	AA	AA	AA
IWA2092	wsnp_Ex_c1604_3060855	[T/C]	AA	BB	AA	AA	AA	AA	BB	AA	BB	BB	AA	BB	BB	BB	AA	AA	AA	BB	AA	BB	BB	AA	BB	BB	AA	BB	BB	AA	AA	AA	AA	AA	BB	AA	BB	AA	AA	BB	BB	AA	BB	BB	AA	BB	BB	BB	AA
IWA2218	wsnp_Ex_c17420_26123728	[T/C]	AA	BB	AA	AA	BB	AA	AA	BB	BB	BB	BB	AA	BB	BB	AA	BB	BB	BB	AA	BB	BB	AA	BB	BB	BB	BB	BB	BB	AA	BB	BB	BB	BB	BB	BB	BB	AA	AA	AA	AA	BB	BB	AA	BB	AA	BB	BB
IWA2271	wsnp_Ex_c1790_3378220	[A/G]	AA	BB	BB	-	AA	AA	BB	BB	AA	AA	BB	AA	BB	AA	BB	AA	AA	BB	AA	BB	AA	AA	BB	BB	BB	BB	BB	AA	AA	AA	BB	AA	BB	BB	BB	AA	BB	AA	BB	BB	BB	AA	AA	BB	BB	BB	BB
IWA2370	wsnp_Ex_c19003_27913936	[T/C]	AA	BB	BB	AA	AA	BB	AA	AA	BB	AA	AA	BB	BB	BB	BB	AA	AA	BB	AA	BB	BB	BB	BB	AA	AA	AA	AA	AA	AA	BB	BB	BB	AA	BB	BB	AA	AA	AA	BB	BB	BB	BB	BB	BB	AA	BB	BB
IWA2404	wsnp_Ex_c19353_28290393	[A/C]	AA	BB	BB	AA	AA	BB	AA	BB	BB	AA	AA	BB	AA	AA	BB	BB	AA	BB	BB	AA	BB	AA	BB	BB	AA	BB	BB	AA	BB	BB	BB	AA	BB	BB	AA	BB	-	BB	AA	AA	BB	AA	BB	BB	AA	AA	AA
IWA2405	wsnp_Ex_c19353_28290651	[A/G]	AA	BB	BB	AA	AA	BB	AA	BB	BB	AA	AA	BB	AA	AA	BB	BB	AA	BB	BB	AA	BB	AA	BB	BB	AA	BB	BB	AA	BB	BB	BB	AA	BB	BB	AA	BB	BB	BB	AA	AA	BB	AA	BB	BB	AA	AA	AA
IWA2455	wsnp_Ex_c19724_28721580	[T/C]	AA	BB	AA	AA	BB	AA	BB	BB	-	AA	BB	AA	AA	AA	AA	BB	BB	BB	BB	BB	AA	AA	AA	BB	AA	BB	AA	AA	AA	BB	BB	AA	AA	AA	BB	BB	AA	BB	-	BB	BB	AA	BB	BB	AA	BB	BB
IWA2476	wsnp_Ex_c1988_3742022	[A/C]	AA	BB	AA	BB	BB	AA	AA	-	BB	AA	AA	AA	BB	BB	BB	AA	BB	AA	BB	BB	BB	AA	BB	BB	AA	AA	BB	BB	BB	-	AA	BB	BB	BB	AA	AA	BB	AA	AA	AA	-	BB	AA	BB	AA	AA	BB
IWA2518	wsnp_Ex_c20250_29303152	[T/G]	AA	BB	BB	AA	AA	BB	AA	BB	AA	AA	AA	BB	BB	AA	BB	BB	AA	AA	AA	BB	AA	BB	AA	AA	BB	BB	BB	AA	AA	AA	AA	BB	BB	AA	AA	AA	AA	AA	BB	AA	BB	AA	BB	BB	AA	AA	BB
IWA2597	wsnp_Ex_c2132_4006417	[T/C]	AA	BB	BB	-	BB	AA	BB	BB	BB	BB	BB	AA	AA	AA	AA	BB	BB	BB	BB	BB	AA	AA	BB	BB	AA	BB	AA	AA	AA	BB	BB	AA	AA	AA	AA	BB	AA	BB	BB	BB	BB	AA	BB	AA	AA	BB	BB
IWA2666	wsnp_Ex_c220_432519	[T/C]	AA	BB	AA	AA	BB	AA	AA	BB	BB	BB	BB	AA	BB	BB	AA	BB	BB	BB	AA	BB	BB	AA	BB	BB	BB	BB	BB	AA	AA	BB	BB	BB	BB	BB	BB	BB	AA	AA	AA	AA	BB	BB	AA	BB	AA	BB	BB
IWA2714	wsnp_Ex_c22423_31615798	[A/C]	AA	BB	BB	BB	BB	AA	BB	BB	AA	AA	BB	BB	BB	AA	AA	AA	AA	BB	BB	BB	AA	BB	-	BB	AA	BB	BB	BB	BB	BB	AA	BB	AA	AA	BB	AA	BB	BB	AA	BB	AA	AA	AA	AA	BB	BB	AA
IWA2729	wsnp_Ex_c2264_4243233	[A/C]	AA	BB	AA	AA	BB	AA	BB	AA	BB	BB	AA	BB	AA	BB	AA	BB	BB	BB	AA	BB	AA	BB	AA	AA	AA	AA	AA	-	AA	AA	BB	BB	AA	AA	-	BB	AA	BB	AA	AA	BB	AA	BB	AA	AA	BB	BB
IWA2764	wsnp_Ex_c22913_32130617	[A/G]	AA	BB	BB	AA	BB	BB	AA	AA	BB	AA	BB	AA	BB	AA	AA	AA	BB	AA	BB	BB	BB	BB	AA	AA	AA	AA	AA	AA	AA	AA	BB	BB	BB	AA	AA	AA	BB	BB	AA	BB	BB	AA	AA	AA	BB	BB	BB
IWA2822	wsnp_Ex_c23633_32868822	[T/C]	AA	BB	BB	AA	AA	AA	AA	AA	-	AA	AA	AA	AA	AA	AA	AA	BB	AA	BB	BB	BB	-	BB	BB	BB	BB	BB	BB	AA	AA	AA	AA	BB	AA	AA	AA	BB	BB	BB	BB	BB	AA	AA	BB	BB	BB	BB
IWA2893	wsnp_Ex_c24376_33618864	[A/G]	AA	BB	BB	BB	BB	AA	AA	BB	AA	AA	AA	AA	AA	AA	BB	AA	AA	AA	AA	AA	AA	BB	BB	BB	AA	BB	BB	AA	BB	AA	BB	AA	BB	AA	BB	AA	BB	BB	BB	BB	BB	BB	AA	BB	BB	BB	BB
IWA2929	wsnp_Ex_c24796_34049469	[T/C]	AA	BB	BB	BB	AA	BB	BB	BB	BB	AA	AA	BB	BB	AA	AA	AA	BB	BB	AA	AA	BB	BB	BB	AA	AA	BB	BB	BB	BB	BB	BB	AA	AA	AA	AA	BB	AA	BB	AA	BB	AA	AA	BB	AA	BB	AA	BB
IWA2997	wsnp_Ex_c25755_35018674	[A/G]	AA	BB	BB	BB	AA	AA	BB	BB	AA	AA	BB	AA	BB	AA	BB	-	AA	BB	AA	BB	AA	AA	BB	BB	BB	BB	BB	AA	AA	AA	BB	AA	BB	BB	BB	AA	BB	AA	BB	BB	BB	AA	AA	BB	BB	BB	BB
IWA3065	wsnp_Ex_c26747_35976442	[T/C]	AA	BB	BB	BB	AA	AA	BB	BB	AA	AA	BB	AA	BB	AA	BB	BB	AA	BB	AA	BB	AA	AA	BB	BB	BB	BB	BB	AA	AA	AA	BB	AA	BB	BB	BB	AA	BB	AA	BB	BB	BB	AA	AA	BB	BB	BB	BB
IWA3068	wsnp_Ex_c26776_36003586	[T/C]	AA	BB	AA	BB	AA	BB	BB	BB	BB	AA	AA	BB	AA	AA	BB	AA	BB	AA	-	BB	BB	BB	BB	AA	AA	BB	BB	AA	BB	AA	AA	AA	BB	AA	BB	AA	BB	AA	AA	BB	BB	AA	BB	AA	BB	AA	BB
IWA3102	wsnp_Ex_c2723_5047601	[T/C]	AA	BB	BB	AA	AA	BB	AA	AA	BB	BB	BB	AA	AA	AA	AA	BB	BB	AA	BB	BB	BB	BB	BB	BB	BB	BB	AA	BB	BB	AA	AA	AA	AA	AA	AA	AA	AA	AA	AA	BB	BB	BB	BB	BB	BB	BB	AA
IWA3111	wsnp_Ex_c27317_36522052	[T/C]	AA	BB	BB	AA	AA	AA	AA	BB	BB	AA	AA	BB	BB	AA	BB	BB	AA	AA	AA	AA	AA	-	AA	AA	BB	BB	BB	BB	AA	BB	AA	BB	BB	AA	AA	AA	AA	AA	BB	AA	BB	BB	BB	BB	AA	AA	BB
IWA3203	wsnp_Ex_c28973_38050204	[A/G]	AA	BB	BB	BB	AA	AA	BB	BB	BB	BB	AA	BB	BB	AA	BB	AA	BB	BB	AA	BB	BB	AA	BB	BB	AA	BB	AA	BB	BB	BB	AA	AA	AA	BB	AA	BB	BB	AA	AA	BB	BB	AA	BB	AA	BB	BB	AA
IWA3218	wsnp_Ex_c2920_5385184	[T/C]	AA	BB	BB	BB	BB	BB	BB	BB	-	BB	BB	BB	BB	BB	BB	-	AA	BB	AA	AA	BB	BB	BB	AA	AA	AA	AA	BB	BB	BB	AA	BB	AA	BB	BB	AA	BB	BB	AA	BB	BB	BB	BB	BB	AA	AA	AA
IWA3233	wsnp_Ex_c29382_38422739	[T/C]	AA	BB	BB	AA	BB	AA	AA	AA	AA	BB	AA	BB	AA	AA	AA	AA	AA	AA	AA	AA	AA	BB	BB	-	AA	BB	AA	AA	AA	AA	BB	AA	AA	AA	BB	AA	BB	BB	AA	BB	BB	BB	BB	AA	BB	AA	AA
IWA3246	wsnp_Ex_c29648_38653281	[T/C]	AA	BB	BB	BB	AA	AA	BB	-	BB	BB	AA	BB	BB	AA	-	AA	BB	BB	AA	BB	BB	AA	BB	BB	AA	BB	AA	BB	BB	BB	AA	AA	AA	BB	AA	BB	BB	AA	AA	BB	BB	AA	BB	AA	BB	BB	AA
IWA3450	wsnp_Ex_c33813_42239400	[A/G]	AA	BB	BB	BB	BB	BB	AA	AA	BB	BB	BB	BB	BB	BB	BB	BB	BB	AA	BB	BB	BB	BB	BB	BB	BB	AA	BB	BB	BB	BB	BB	BB	BB	BB	BB	BB	AA	BB	BB	BB	AA	BB	BB	BB	-	BB	BB
IWA3474	wsnp_Ex_c34303_42642389	[T/G]	AA	BB	BB	BB	BB	AA	AA	BB	AA	AA	BB	BB	BB	BB	AA	AA	AA	BB	AA	AA	AA	BB	BB	AA	AA	AA	BB	AA	BB	AA	BB	BB	AA	BB	BB	BB	AA	BB	AA	BB	AA	BB	BB	AA	AA	AA	AA
IWA3477	wsnp_Ex_c34344_42677360	[A/G]	AA	BB	BB	AA	AA	AA	BB	BB	AA	AA	BB	AA	AA	BB	AA	AA	AA	BB	BB	BB	BB	AA	AA	AA	AA	BB	BB	AA	BB	BB	AA	BB	BB	BB	BB	BB	AA	AA	AA	BB	BB	AA	BB	AA	AA	BB	AA
IWA3541	wsnp_Ex_c35839_43909163	[A/G]	AA	BB	BB	AA	BB	BB	AA	BB	BB	BB	BB	AA	-	AA	AA	AA	BB	AA	AA	-	BB	BB	AA	AA	AA	AA	AA	AA	AA	AA	AA	BB	BB	AA	AA	AA	AA	BB	BB	AA	BB	AA	BB	AA	AA	BB	BB
IWA3544	wsnp_Ex_c35861_43926854	[A/G]	AA	BB	BB	AA	BB	BB	AA	BB	BB	BB	BB	BB	BB	AA	BB	BB	-	AA	BB	BB	AA	-	AA	AA	AA	BB	AA	BB	AA	BB	AA	BB	AA	BB	AA	AA	AA	AA	BB	AA	AA	BB	AA	BB	BB	BB	-
IWA3564	wsnp_Ex_c3614_6602465	[A/G]	AA	BB	BB	BB	BB	BB	BB	BB	BB	AA	AA	BB	BB	AA	BB	AA	-	AA	AA	BB	BB	BB	BB	BB	AA	BB	BB	BB	BB	BB	-	-	AA	AA	BB	AA	BB	BB	AA	BB	BB	AA	-	AA	BB	BB	AA
IWA3615	wsnp_Ex_c37502_45236634	[T/C]	AA	BB	AA	AA	BB	AA	BB	BB	AA	BB	BB	BB	BB	AA	-	AA	BB	BB	BB	BB	BB	BB	BB	AA	BB	BB	BB	AA	AA	AA	BB	AA	BB	-	BB	AA	AA	AA	AA	AA	BB	BB	AA	BB	BB	BB	AA
IWA3684	wsnp_Ex_c39616_46871127	[A/G]	AA	BB	AA	AA	BB	AA	AA	AA	BB	AA	AA	AA	AA	BB	BB	AA	BB	AA	BB	AA	AA	BB	AA	BB	AA	BB	BB	BB	BB	AA	AA	BB	AA	BB	BB	AA	AA	BB	BB	AA	AA	BB	AA	BB	AA	AA	BB
IWA3717	wsnp_Ex_c4026_7281501	[A/G]	AA	BB	AA	BB	AA	BB	AA	AA	AA	AA	BB	AA	AA	AA	BB	BB	AA	AA	BB	BB	BB	AA	AA	AA	BB	BB	AA	BB	AA	BB	AA	BB	AA	BB	AA	AA	AA	BB	BB	BB	AA	BB	BB	BB	BB	AA	BB
IWA3796	wsnp_Ex_c41790_48535809	[T/C]	AA	BB	BB	BB	BB	BB	AA	BB	BB	BB	BB	BB	BB	BB	BB	BB	BB	AA	BB	BB	BB	BB	BB	BB	BB	BB	BB	BB	BB	BB	BB	BB	BB	BB	BB	BB	AA	BB	BB	BB	AA	BB	BB	BB	BB	BB	BB
IWA3797	wsnp_Ex_c4180_7550457	[A/G]	AA	BB	BB	BB	BB	BB	AA	BB	BB	BB	BB	BB	BB	BB	BB	BB	BB	AA	BB	BB	BB	BB	BB	BB	BB	BB	BB	BB	BB	BB	BB	BB	BB	BB	BB	BB	AA	BB	BB	BB	AA	BB	BB	BB	BB	BB	BB
IWA3799	wsnp_Ex_c4186_7560575	[T/C]	AA	BB	-	AA	AA	BB	AA	-	BB	AA	BB	BB	AA	BB	BB	BB	AA	BB	BB	BB	BB	AA	AA	BB	AA	AA	AA	AA	BB	-	BB	AA	BB	BB	AA	BB	BB	BB	AA	BB	BB	BB	AA	BB	BB	BB	BB
IWA3824	wsnp_Ex_c42316_48926687	[T/C]	AA	BB	BB	BB	BB	BB	BB	BB	BB	AA	AA	BB	BB	AA	BB	AA	BB	AA	AA	BB	BB	BB	BB	BB	AA	BB	BB	BB	BB	BB	-	AA	AA	AA	BB	AA	BB	BB	AA	BB	BB	AA	-	AA	BB	BB	AA
IWA3845	wsnp_Ex_c4286_7734046	[A/G]	AA	BB	BB	AA	BB	BB	AA	BB	BB	BB	BB	AA	-	AA	AA	AA	BB	AA	AA	-	BB	BB	AA	AA	AA	AA	AA	AA	AA	AA	AA	BB	BB	AA	AA	AA	AA	BB	BB	AA	BB	AA	-	AA	AA	BB	BB
IWA3870	wsnp_Ex_c43518_49814933	[T/C]	AA	BB	-	AA	AA	AA	BB	BB	BB	AA	BB	AA	AA	AA	AA	BB	BB	BB	BB	BB	AA	AA	BB	BB	AA	BB	AA	AA	AA	BB	BB	AA	AA	AA	AA	BB	AA	BB	-	BB	BB	AA	BB	AA	AA	BB	-
IWA3915	wsnp_Ex_c44814_50770533	[A/G]	AA	BB	BB	BB	BB	AA	AA	BB	AA	AA	AA	AA	AA	AA	BB	AA	AA	AA	AA	AA	AA	BB	BB	BB	AA	BB	BB	AA	BB	AA	BB	AA	BB	AA	BB	AA	BB	AA	BB	BB	BB	BB	AA	BB	BB	BB	BB
IWA3917	wsnp_Ex_c44857_50804565	[A/C]	AA	BB	BB	BB	BB	BB	AA	BB	BB	BB	BB	BB	BB	BB	BB	BB	BB	AA	BB	BB	BB	BB	BB	BB	BB	AA	BB	BB	BB	BB	BB	BB	BB	BB	BB	BB	AA	BB	BB	BB	AA	BB	BB	BB	-	BB	BB
IWA3978	wsnp_Ex_c4668_8353336	[T/C]	AA	BB	BB	AA	BB	BB	BB	AA	BB	AA	BB	BB	AA	BB	AA	BB	AA	AA	BB	BB	AA	BB	AA	BB	BB	AA	AA	BB	BB	AA	AA	BB	BB	AA	AA	AA	BB	BB	AA	AA	BB	BB	AA	AA	BB	BB	BB
IWA3979	wsnp_Ex_c4668_8353466	[A/G]	AA	BB	BB	AA	BB	BB	BB	AA	BB	AA	BB	BB	AA	BB	AA	BB	AA	AA	BB	BB	AA	BB	AA	BB	BB	AA	AA	BB	BB	AA	AA	BB	BB	AA	AA	AA	BB	BB	AA	AA	BB	BB	AA	AA	BB	BB	BB
IWA4002	wsnp_Ex_c47919_52987043	[T/C]	AA	BB	BB	BB	BB	AA	BB	BB	AA	BB	BB	-	AA	AA	AA	AA	BB	AA	AA	AA	BB	AA	AA	BB	BB	-	BB	AA	BB	AA	BB	AA	BB	AA	AA	AA	BB	BB	BB	BB	AA	AA	BB	AA	BB	BB	AA
IWA4034	wsnp_Ex_c4876_8692849	[T/C]	AA	BB	BB	BB	AA	AA	AA	AA	AA	AA	BB	BB	BB	AA	AA	BB	-	AA	-	BB	AA	AA	BB	AA	BB	BB	BB	AA	AA	BB	BB	AA	BB	BB	BB	BB	BB	BB	BB	BB	BB	AA	BB	AA	AA	AA	BB
IWA4035	wsnp_Ex_c48789_53586406	[A/C]	AA	BB	AA	AA	BB	AA	AA	AA	AA	BB	AA	AA	AA	AA	AA	BB	AA	BB	AA	AA	BB	AA	BB	AA	BB	AA	BB	AA	BB	BB	BB	AA	BB	AA	BB	AA	AA	AA	BB	AA	AA	-	AA	AA	BB	AA	BB
IWA4257	wsnp_Ex_c55051_57706127	[T/C]	AA	BB	BB	AA	AA	AA	AA	AA	AA	AA	AA	AA	BB	AA	AA	AA	BB	AA	BB	BB	BB	BB	BB	BB	BB	BB	AA	BB	AA	AA	AA	AA	BB	AA	AA	AA	BB	BB	BB	BB	BB	AA	AA	BB	AA	BB	BB
IWA4258	wsnp_Ex_c55096_57733841	[A/G]	AA	BB	BB	AA	AA	BB	AA	BB	AA	BB	AA	AA	AA	AA	AA	AA	AA	AA	BB	AA	AA	BB	BB	AA	BB	BB	AA	AA	AA	AA	AA	BB	BB	AA	AA	BB	AA	AA	BB	AA	BB	AA	BB	BB	AA	AA	AA
IWA4292	wsnp_Ex_c56097_58352130	[A/G]	AA	BB	BB	AA	AA	BB	BB	BB	AA	AA	-	AA	AA	AA	AA	AA	AA	BB	BB	BB	BB	-	AA	AA	AA	BB	BB	AA	BB	BB	AA	BB	BB	BB	BB	BB	AA	AA	AA	-	BB	AA	-	AA	AA	BB	AA
IWA4309	wsnp_Ex_c5653_9937062	[T/G]	AA	BB	AA	BB	BB	BB	AA	AA	AA	BB	BB	AA	BB	BB	BB	AA	AA	AA	AA	BB	AA	BB	BB	AA	BB	BB	AA	BB	AA	AA	AA	AA	AA	AA	BB	AA	BB	AA	BB	BB	AA	BB	BB	BB	AA	AA	AA
IWA4358	wsnp_Ex_c58274_59639258	[T/C]	AA	BB	BB	AA	BB	AA	AA	AA	AA	AA	AA	BB	BB	AA	BB	AA	AA	AA	AA	AA	BB	BB	AA	AA	AA	AA	AA	BB	AA	AA	BB	BB	AA	AA	BB	AA	BB	BB	AA	AA	BB	AA	AA	AA	AA	BB	BB
IWA4359	wsnp_Ex_c58286_59646499	[T/C]	AA	BB	BB	AA	BB	BB	AA	BB	BB	BB	BB	AA	-	AA	AA	AA	BB	AA	AA	-	BB	BB	AA	AA	AA	AA	AA	AA	AA	AA	AA	BB	BB	AA	AA	AA	AA	BB	BB	AA	BB	AA	-	AA	AA	BB	BB
IWA4377	wsnp_Ex_c5915_10378599	[T/C]	AA	BB	-	AA	-	AA	BB	BB	BB	-	BB	AA	AA	AA	AA	BB	BB	BB	BB	BB	AA	BB	BB	BB	AA	BB	AA	AA	AA	BB	BB	AA	AA	AA	AA	BB	AA	BB	-	BB	BB	AA	BB	AA	AA	BB	BB
IWA4378	wsnp_Ex_c5915_10378807	[A/G]	AA	BB	-	AA	AA	AA	BB	BB	BB	AA	BB	AA	AA	AA	AA	BB	BB	BB	BB	BB	AA	BB	BB	BB	AA	BB	AA	AA	AA	BB	BB	AA	AA	AA	AA	BB	AA	BB	-	BB	BB	AA	BB	AA	AA	BB	-
IWA4418	wsnp_Ex_c608_1206143	[A/G]	AA	BB	AA	AA	BB	AA	AA	AA	AA	BB	AA	AA	AA	AA	AA	BB	AA	BB	AA	AA	BB	AA	BB	AA	BB	AA	BB	AA	BB	BB	BB	AA	BB	AA	BB	AA	AA	AA	BB	AA	AA	AA	AA	AA	BB	AA	BB
IWA4494	wsnp_Ex_c6391_11109898	[T/G]	AA	BB	-	AA	-	AA	BB	BB	BB	-	BB	AA	AA	AA	AA	BB	BB	BB	BB	BB	AA	AA	BB	BB	AA	BB	AA	AA	AA	BB	BB	AA	AA	AA	AA	BB	AA	BB	BB	BB	BB	AA	BB	AA	AA	BB	BB
IWA4532	wsnp_Ex_c6537_11339130	[T/C]	AA	BB	BB	BB	BB	BB	BB	BB	BB	AA	AA	BB	BB	AA	BB	AA	BB	AA	AA	BB	BB	BB	BB	BB	AA	BB	BB	BB	BB	BB	-	-	AA	AA	BB	AA	BB	BB	AA	BB	BB	AA	-	AA	BB	BB	AA
IWA4569	wsnp_Ex_c6739_11646407	[A/G]	AA	BB	AA	AA	BB	AA	BB	BB	AA	BB	-	BB	BB	AA	-	AA	BB	BB	BB	BB	BB	BB	BB	AA	BB	BB	BB	AA	AA	AA	BB	AA	BB	BB	BB	AA	AA	AA	AA	AA	BB	BB	AA	BB	BB	BB	AA
IWA4600	wsnp_Ex_c700_1379957	[A/C]	AA	BB	AA	AA	BB	BB	BB	AA	BB	BB	BB	BB	-	AA	BB	BB	BB	BB	AA	AA	AA	AA	BB	AA	AA	BB	BB	AA	BB	AA	AA	BB	AA	AA	AA	AA	BB	BB	AA	BB	AA	BB	AA	AA	AA	AA	AA
IWA4602	wsnp_Ex_c7002_12063325	[T/C]	AA	BB	BB	BB	AA	AA	BB	AA	BB	BB	AA	BB	BB	AA	AA	AA	BB	BB	AA	BB	BB	AA	AA	BB	AA	BB	AA	BB	AA	AA	AA	AA	AA	BB	AA	BB	BB	AA	AA	BB	BB	AA	BB	AA	AA	BB	BB
IWA4712	wsnp_Ex_c76693_73578311	[A/G]	AA	BB	-	BB	BB	BB	BB	-	BB	-	BB	AA	-	BB	BB	AA	AA	AA	BB	AA	BB	BB	BB	AA	AA	AA	BB	BB	BB	AA	AA	BB	AA	BB	BB	AA	BB	AA	AA	BB	BB	BB	BB	BB	AA	BB	AA
IWA4772	wsnp_Ex_c8131_13754852	[T/C]	AA	BB	BB	AA	BB	BB	AA	BB	BB	BB	BB	AA	BB	AA	-	AA	BB	AA	AA	BB	BB	BB	AA	AA	AA	AA	AA	AA	AA	AA	AA	BB	BB	AA	AA	BB	AA	BB	BB	AA	BB	AA	BB	AA	-	BB	BB
IWA4774	wsnp_Ex_c8142_13769831	[T/C]	AA	BB	BB	BB	BB	AA	BB	AA	BB	BB	AA	BB	AA	BB	AA	BB	BB	BB	BB	BB	BB	BB	AA	AA	AA	AA	AA	AA	AA	AA	BB	BB	AA	AA	AA	AA	AA	AA	AA	AA	BB	BB	BB	AA	AA	BB	BB
IWA4800	wsnp_Ex_c8386_14127329	[T/G]	AA	BB	AA	BB	BB	AA	BB	BB	AA	AA	AA	BB	AA	AA	BB	AA	AA	BB	AA	AA	BB	BB	AA	AA	AA	AA	BB	BB	BB	AA	AA	BB	AA	BB	AA	AA	AA	AA	-	AA	AA	BB	BB	AA	AA	AA	BB
IWA4806	wsnp_Ex_c8429_14198883	[T/C]	AA	BB	AA	AA	AA	AA	BB	AA	BB	AA	AA	AA	AA	BB	BB	AA	BB	BB	BB	AA	AA	BB	BB	AA	AA	BB	BB	BB	AA	AA	AA	BB	AA	BB	BB	AA	AA	BB	BB	AA	AA	AA	AA	BB	AA	AA	BB
IWA4848	wsnp_Ex_c8843_14783989	[T/C]	AA	BB	BB	BB	BB	BB	AA	BB	BB	BB	BB	BB	BB	BB	BB	BB	BB	AA	BB	BB	BB	BB	BB	BB	BB	-	BB	BB	BB	BB	BB	BB	BB	BB	BB	BB	AA	BB	BB	BB	AA	BB	BB	BB	-	BB	BB
IWA4906	wsnp_Ex_c9390_15586085	[A/G]	AA	BB	AA	BB	BB	BB	BB	-	BB	BB	BB	BB	BB	AA	BB	BB	BB	BB	AA	AA	BB	AA	BB	AA	-	AA	BB	AA	BB	-	BB	BB	AA	BB	BB	AA	BB	BB	AA	BB	BB	BB	-	AA	AA	AA	AA
IWA4914	wsnp_Ex_c94356_82888150	[T/C]	AA	BB	BB	BB	AA	BB	AA	AA	AA	AA	AA	AA	AA	AA	BB	BB	BB	AA	AA	AA	BB	AA	AA	AA	BB	BB	AA	BB	AA	AA	AA	BB	BB	BB	AA	AA	-	BB	BB	BB	BB	AA	BB	BB	BB	AA	BB
IWA4919	wsnp_Ex_c946_1814027	[T/C]	AA	BB	BB	BB	BB	AA	BB	BB	BB	BB	BB	AA	AA	AA	BB	BB	AA	AA	BB	AA	BB	BB	BB	BB	AA	AA	BB	BB	BB	AA	BB	AA	AA	BB	AA	BB	BB	AA	BB	AA	BB	AA	AA	AA	AA	BB	BB
IWA4932	wsnp_Ex_c95453_83448583	[T/C]	AA	BB	AA	AA	BB	AA	BB	AA	AA	AA	BB	AA	BB	BB	AA	AA	BB	BB	AA	AA	BB	BB	BB	AA	AA	AA	BB	BB	AA	AA	AA	AA	AA	BB	AA	AA	AA	BB	AA	AA	AA	AA	BB	BB	AA	AA	AA
IWA4967	wsnp_Ex_c9813_16193645	[A/C]	AA	BB	BB	-	BB	AA	AA	BB	AA	AA	AA	AA	AA	AA	BB	AA	AA	AA	AA	AA	AA	BB	BB	BB	AA	BB	BB	AA	BB	AA	BB	AA	BB	AA	BB	AA	BB	AA	BB	BB	BB	BB	AA	BB	BB	BB	BB
IWA4997	wsnp_Ex_rep_c101133_86572194	[A/C]	AA	BB	AA	BB	BB	AA	AA	AA	BB	AA	AA	AA	BB	BB	BB	AA	-	AA	BB	BB	-	AA	-	BB	AA	AA	AA	BB	BB	AA	AA	BB	BB	BB	AA	AA	BB	AA	AA	AA	AA	BB	AA	AA	AA	AA	BB
IWA5001	wsnp_Ex_rep_c101269_86664147	[A/G]	AA	BB	AA	BB	BB	AA	AA	AA	AA	BB	BB	AA	BB	BB	AA	AA	AA	AA	AA	BB	AA	BB	BB	BB	BB	BB	AA	BB	BB	AA	AA	AA	AA	AA	AA	AA	BB	AA	BB	BB	BB	BB	BB	BB	BB	AA	AA
IWA5025	wsnp_Ex_rep_c101615_86954680	[T/C]	AA	BB	AA	AA	AA	AA	AA	AA	BB	BB	AA	BB	BB	BB	AA	AA	AA	BB	AA	BB	BB	BB	BB	BB	AA	AA	AA	BB	AA	AA	AA	AA	BB	AA	BB	AA	AA	BB	BB	AA	BB	AA	AA	BB	BB	BB	AA
IWA5070	wsnp_Ex_rep_c102633_87756283	[A/G]	AA	BB	AA	AA	BB	AA	AA	AA	-	AA	-	AA	AA	BB	BB	AA	BB	BB	BB	AA	AA	BB	AA	BB	AA	BB	BB	BB	BB	AA	AA	BB	AA	BB	BB	AA	AA	BB	-	AA	AA	BB	AA	BB	AA	AA	BB
IWA5094	wsnp_Ex_rep_c103402_88371152	[A/G]	AA	BB	BB	BB	BB	BB	AA	AA	BB	-	AA	AA	AA	AA	AA	BB	BB	BB	AA	AA	BB	AA	AA	AA	BB	AA	AA	BB	AA	BB	AA	BB	AA	BB	AA	AA	BB	BB	-	BB	AA	AA	BB	BB	BB	AA	BB
IWA5102	wsnp_Ex_rep_c103517_88455567	[A/G]	AA	BB	BB	BB	BB	BB	AA	BB	BB	BB	BB	BB	BB	BB	BB	BB	BB	AA	BB	BB	BB	BB	BB	BB	BB	-	BB	BB	BB	BB	BB	BB	BB	BB	BB	BB	AA	BB	BB	BB	AA	BB	BB	BB	BB	BB	BB
IWA5106	wsnp_Ex_rep_c103892_88739043	[T/C]	AA	BB	AA	BB	BB	AA	BB	BB	AA	AA	AA	BB	AA	AA	BB	AA	AA	BB	AA	AA	BB	BB	AA	AA	AA	AA	BB	BB	BB	AA	AA	BB	AA	BB	AA	AA	AA	AA	AA	AA	AA	BB	BB	AA	AA	AA	BB
IWA5118	wsnp_Ex_rep_c104539_89224552	[T/G]	AA	BB	BB	BB	AA	BB	AA	AA	AA	AA	BB	AA	AA	AA	BB	BB	AA	AA	AA	BB	BB	AA	AA	AA	BB	BB	AA	BB	AA	AA	AA	BB	AA	BB	AA	AA	-	BB	BB	BB	AA	BB	BB	BB	BB	AA	BB
IWA5150	wsnp_Ex_rep_c106111_90308719	[T/G]	AA	BB	BB	BB	AA	AA	AA	AA	AA	AA	BB	BB	BB	AA	AA	BB	BB	AA	BB	BB	AA	BB	BB	BB	BB	AA	BB	AA	AA	BB	BB	AA	AA	BB	BB	AA	BB	BB	BB	BB	BB	AA	AA	AA	AA	AA	AA
IWA5191	wsnp_Ex_rep_c66274_64426901	[A/C]	AA	BB	BB	AA	AA	BB	AA	BB	AA	BB	AA	BB	AA	AA	AA	AA	AA	AA	BB	AA	AA	BB	BB	AA	BB	BB	AA	AA	AA	AA	AA	BB	BB	AA	AA	BB	AA	AA	AA	AA	BB	AA	BB	BB	AA	AA	AA
IWA5207	wsnp_Ex_rep_c66349_64528826	[A/G]	AA	BB	BB	BB	BB	AA	BB	BB	AA	BB	BB	-	AA	AA	AA	AA	BB	AA	AA	AA	BB	AA	AA	BB	BB	-	BB	AA	BB	AA	BB	AA	BB	AA	AA	AA	BB	BB	BB	BB	AA	AA	BB	AA	BB	BB	AA
IWA5256	wsnp_Ex_rep_c66524_64799410	[T/C]	AA	BB	BB	BB	BB	AA	BB	BB	AA	AA	BB	BB	BB	BB	-	AA	AA	BB	BB	BB	AA	BB	-	BB	AA	BB	BB	BB	BB	BB	AA	BB	AA	AA	BB	AA	BB	BB	AA	BB	BB	AA	AA	AA	BB	BB	AA
IWA5301	wsnp_Ex_rep_c66774_65133356	[T/C]	AA	BB	BB	AA	AA	AA	-	AA	BB	AA	AA	AA	AA	BB	AA	BB	BB	BB	BB	AA	AA	AA	BB	AA	AA	BB	BB	AA	AA	BB	AA	BB	AA	BB	BB	AA	AA	AA	AA	AA	AA	BB	AA	BB	AA	BB	BB
IWA5336	wsnp_Ex_rep_c66939_65370468	[T/C]	AA	BB	BB	AA	BB	BB	BB	AA	BB	AA	BB	BB	AA	BB	AA	BB	AA	AA	BB	BB	AA	BB	AA	BB	BB	AA	AA	BB	BB	AA	AA	BB	BB	AA	AA	AA	BB	BB	AA	AA	BB	BB	AA	AA	BB	BB	BB
IWA5442	wsnp_Ex_rep_c67697_66363222	[T/C]	AA	BB	BB	BB	BB	AA	-	BB	AA	AA	BB	BB	BB	BB	AA	AA	AA	BB	AA	AA	AA	BB	BB	AA	AA	AA	BB	AA	BB	AA	BB	BB	AA	BB	BB	AA	AA	BB	AA	BB	AA	BB	BB	AA	AA	AA	AA
IWA5494	wsnp_Ex_rep_c68091_66846454	[T/C]	AA	BB	BB	-	BB	AA	BB	BB	BB	BB	BB	AA	AA	AA	AA	BB	BB	BB	BB	BB	AA	BB	BB	BB	AA	BB	AA	AA	AA	BB	BB	AA	AA	AA	AA	BB	AA	BB	BB	BB	BB	AA	BB	AA	AA	BB	BB
IWA5552	wsnp_Ex_rep_c68600_67449494	[T/G]	AA	BB	BB	BB	AA	AA	BB	AA	BB	BB	AA	BB	AA	BB	AA	BB	BB	BB	AA	BB	BB	BB	AA	AA	AA	AA	AA	BB	AA	AA	BB	BB	AA	AA	AA	BB	AA	AA	AA	BB	BB	BB	BB	AA	AA	BB	AA
IWA5556	wsnp_Ex_rep_c68624_67475477	[A/C]	AA	BB	-	BB	BB	BB	BB	-	BB	-	BB	AA	-	BB	BB	AA	AA	AA	BB	AA	BB	BB	BB	AA	AA	AA	BB	BB	BB	AA	AA	BB	AA	BB	BB	AA	BB	AA	AA	BB	BB	BB	BB	BB	AA	BB	AA
IWA5652	wsnp_Ex_rep_c69890_68851948	[T/G]	AA	BB	BB	AA	BB	BB	AA	BB	BB	BB	BB	AA	BB	AA	AA	AA	BB	AA	AA	BB	BB	BB	AA	AA	AA	AA	AA	AA	AA	AA	AA	BB	BB	AA	AA	-	AA	BB	BB	AA	BB	AA	BB	AA	AA	BB	BB
IWA5704	wsnp_Ex_rep_c70675_69579757	[A/C]	AA	BB	BB	BB	AA	AA	BB	AA	BB	BB	AA	BB	BB	AA	BB	AA	BB	BB	AA	BB	BB	AA	BB	BB	AA	BB	AA	BB	AA	AA	AA	AA	AA	BB	AA	BB	BB	AA	AA	BB	BB	AA	BB	AA	BB	BB	BB
IWA5706	wsnp_Ex_rep_c70700_69597262	[A/C]	AA	BB	AA	BB	AA	AA	BB	BB	AA	BB	BB	AA	BB	AA	BB	-	BB	BB	AA	BB	AA	BB	BB	AA	BB	BB	BB	BB	AA	AA	BB	AA	BB	BB	AA	AA	BB	AA	BB	AA	BB	BB	BB	BB	AA	AA	BB
IWA5740	wsnp_Ex_rep_c73818_71733737	[T/G]	AA	BB	BB	AA	AA	BB	BB	BB	AA	AA	-	AA	AA	AA	AA	AA	AA	BB	BB	BB	BB	-	AA	AA	AA	BB	BB	AA	BB	BB	AA	BB	BB	BB	BB	BB	AA	AA	AA	BB	BB	AA	-	AA	AA	BB	AA
IWA5773	wsnp_JD_c10416_11077664	[A/G]	AA	BB	-	-	-	AA	BB	BB	BB	-	BB	AA	AA	AA	AA	BB	BB	BB	BB	BB	AA	AA	BB	BB	AA	BB	AA	AA	AA	BB	BB	AA	AA	AA	AA	BB	AA	BB	BB	BB	BB	AA	BB	AA	AA	BB	BB
IWA5791	wsnp_JD_c1201_1745777	[A/G]	AA	BB	BB	BB	BB	-	BB	BB	AA	BB	AA	BB	AA	AA	AA	AA	BB	BB	AA	AA	AA	AA	BB	BB	BB	-	BB	BB	BB	AA	BB	AA	BB	AA	AA	BB	AA	BB	BB	BB	AA	-	BB	AA	AA	BB	AA
IWA5839	wsnp_JD_c13903_13781269	[T/C]	AA	BB	BB	AA	AA	BB	BB	BB	AA	AA	BB	AA	AA	AA	AA	AA	AA	BB	BB	BB	-	-	AA	AA	AA	BB	BB	AA	BB	BB	AA	BB	BB	BB	BB	BB	AA	AA	AA	-	BB	AA	-	AA	AA	BB	AA
IWA5881	wsnp_JD_c17128_16056425	[A/G]	AA	BB	AA	-	BB	AA	AA	AA	AA	BB	BB	AA	BB	BB	AA	AA	AA	AA	AA	BB	AA	BB	BB	BB	BB	BB	AA	BB	BB	AA	AA	AA	AA	AA	AA	AA	BB	AA	BB	BB	BB	BB	BB	BB	BB	AA	AA
IWA5903	wsnp_JD_c1988_2766651	[A/G]	AA	BB	BB	BB	AA	BB	BB	BB	BB	AA	AA	BB	AA	AA	AA	AA	BB	AA	-	AA	AA	BB	BB	AA	AA	-	BB	BB	BB	BB	AA	AA	BB	BB	BB	BB	BB	BB	BB	BB	BB	AA	BB	BB	BB	AA	BB
IWA5934	wsnp_JD_c222_352320	[A/C]	AA	BB	AA	BB	BB	AA	BB	BB	AA	AA	AA	BB	AA	AA	BB	AA	AA	BB	AA	AA	BB	BB	AA	AA	AA	AA	BB	BB	BB	AA	AA	BB	AA	BB	AA	AA	AA	AA	-	AA	AA	BB	BB	AA	AA	AA	BB
IWA5955	wsnp_JD_c2488_3379427	[T/C]	AA	BB	AA	AA	BB	AA	AA	BB	-	BB	BB	AA	BB	BB	AA	BB	BB	BB	AA	BB	BB	AA	-	BB	BB	BB	BB	AA	AA	BB	BB	BB	BB	BB	BB	BB	AA	AA	AA	AA	BB	BB	AA	-	AA	BB	BB
IWA5966	wsnp_JD_c2691_3617481	[T/C]	AA	BB	BB	BB	BB	BB	AA	BB	BB	BB	BB	BB	BB	BB	BB	BB	BB	AA	BB	BB	BB	BB	BB	BB	BB	-	BB	BB	BB	BB	BB	BB	BB	BB	BB	BB	AA	BB	BB	BB	AA	BB	BB	BB	-	BB	BB
IWA6012	wsnp_JD_c34368_25929293	[A/G]	AA	BB	AA	AA	BB	AA	AA	AA	AA	BB	AA	AA	AA	AA	AA	BB	AA	BB	AA	AA	BB	AA	BB	AA	BB	AA	BB	AA	BB	BB	BB	AA	BB	AA	BB	AA	-	AA	BB	AA	AA	-	-	AA	BB	AA	BB
IWA6020	wsnp_JD_c36045_26751163	[T/C]	AA	BB	BB	AA	BB	BB	AA	BB	BB	BB	BB	AA	BB	AA	AA	AA	BB	AA	AA	BB	BB	BB	AA	AA	AA	AA	AA	AA	AA	AA	AA	BB	BB	AA	AA	-	AA	BB	BB	AA	BB	AA	BB	AA	AA	BB	BB
IWA6022	wsnp_JD_c3632_4663459	[T/C]	AA	BB	AA	AA	BB	AA	BB	AA	AA	AA	BB	AA	BB	BB	AA	AA	BB	BB	AA	AA	BB	BB	BB	AA	AA	AA	BB	BB	AA	AA	AA	AA	AA	BB	AA	AA	AA	BB	AA	AA	AA	AA	BB	BB	AA	AA	AA
IWA6115	wsnp_JD_c5861_7018974	[T/C]	AA	BB	BB	BB	AA	BB	BB	BB	BB	AA	AA	BB	-	AA	AA	AA	BB	-	AA	AA	BB	BB	BB	AA	AA	BB	BB	BB	BB	BB	BB	AA	AA	AA	AA	BB	AA	BB	AA	BB	AA	AA	BB	AA	BB	AA	BB
IWA6134	wsnp_JD_c6331_7499499	[T/C]	AA	BB	AA	AA	BB	AA	AA	AA	-	AA	-	AA	AA	BB	BB	AA	BB	BB	BB	AA	AA	BB	-	BB	AA	BB	BB	BB	BB	AA	AA	BB	AA	BB	BB	AA	AA	BB	BB	AA	AA	BB	AA	BB	AA	AA	BB
IWA6172	wsnp_JD_c7522_8606553	[A/G]	AA	BB	BB	BB	AA	AA	AA	AA	AA	AA	BB	BB	BB	AA	AA	BB	-	AA	BB	BB	AA	AA	BB	-	BB	BB	BB	AA	AA	BB	BB	AA	BB	BB	BB	BB	BB	BB	BB	BB	BB	AA	BB	AA	AA	AA	BB
IWA6173	wsnp_JD_c7528_8610786	[T/C]	AA	BB	BB	AA	AA	BB	AA	BB	AA	-	AA	AA	AA	AA	AA	AA	AA	AA	BB	AA	AA	BB	BB	AA	BB	BB	AA	AA	AA	AA	AA	BB	BB	AA	AA	-	AA	AA	BB	AA	BB	AA	BB	BB	AA	AA	AA
IWA6185	wsnp_JD_c8158_9193784	[T/C]	AA	BB	BB	BB	BB	BB	BB	AA	BB	-	BB	AA	AA	BB	BB	-	AA	AA	BB	AA	BB	BB	BB	AA	AA	AA	BB	BB	BB	AA	AA	BB	AA	BB	BB	AA	BB	AA	AA	BB	BB	BB	BB	BB	AA	BB	AA
IWA6201	wsnp_JD_c8629_9593995	[T/C]	AA	BB	BB	BB	BB	BB	BB	BB	BB	BB	BB	AA	BB	BB	BB	-	AA	-	BB	AA	BB	BB	BB	AA	AA	AA	BB	BB	BB	AA	AA	BB	AA	BB	BB	AA	BB	AA	AA	BB	BB	BB	BB	BB	AA	BB	AA
IWA6202	wsnp_JD_c8629_9594108	[T/C]	AA	BB	BB	BB	BB	BB	BB	BB	BB	BB	BB	AA	BB	BB	BB	BB	AA	-	BB	AA	BB	BB	BB	AA	AA	AA	BB	BB	BB	AA	AA	BB	AA	BB	BB	AA	BB	AA	AA	BB	BB	BB	BB	BB	AA	BB	AA
IWA6246	wsnp_JD_rep_c48755_32989025	[T/C]	AA	BB	AA	BB	BB	AA	AA	AA	AA	BB	BB	AA	BB	BB	AA	AA	AA	AA	AA	BB	AA	BB	BB	-	BB	BB	AA	BB	BB	AA	AA	AA	AA	AA	AA	AA	BB	AA	BB	BB	BB	BB	BB	BB	BB	AA	AA
IWA6252	wsnp_JD_rep_c49006_33254837	[A/G]	AA	BB	BB	AA	AA	BB	AA	BB	BB	BB	BB	BB	BB	AA	BB	BB	AA	BB	BB	BB	BB	AA	BB	BB	AA	AA	AA	BB	BB	AA	BB	AA	BB	BB	BB	BB	BB	BB	AA	AA	BB	BB	AA	BB	BB	-	AA
IWA6322	wsnp_JG_c126_94990	[T/C]	AA	BB	BB	-	AA	AA	BB	BB	AA	AA	BB	AA	BB	AA	BB	-	AA	BB	AA	BB	AA	AA	BB	AA	BB	BB	BB	BB	AA	AA	BB	BB	BB	BB	BB	AA	BB	AA	BB	BB	BB	AA	AA	BB	BB	BB	BB
IWA6329	wsnp_JG_c1834_901723	[A/C]	AA	BB	AA	AA	BB	BB	AA	BB	BB	BB	AA	BB	BB	BB	BB	BB	BB	AA	BB	BB	BB	BB	BB	BB	BB	-	BB	BB	BB	BB	BB	BB	BB	BB	BB	BB	AA	AA	BB	AA	AA	BB	BB	BB	BB	BB	BB
IWA6387	wsnp_Ku_c10362_17156084	[T/C]	AA	BB	BB	AA	AA	AA	AA	AA	-	AA	AA	AA	AA	AA	AA	AA	BB	AA	BB	BB	BB	-	BB	BB	BB	BB	-	BB	AA	AA	AA	AA	-	AA	AA	AA	BB	BB	BB	BB	BB	AA	AA	BB	BB	BB	BB
IWA6399	wsnp_Ku_c10564_17435459	[A/C]	AA	BB	BB	AA	BB	AA	AA	AA	AA	AA	AA	BB	BB	AA	-	AA	AA	AA	AA	AA	-	BB	AA	AA	AA	AA	AA	BB	AA	AA	BB	BB	AA	AA	BB	AA	BB	BB	AA	AA	BB	AA	AA	AA	AA	BB	BB
IWA6461	wsnp_Ku_c12503_20174234	[T/C]	AA	BB	AA	BB	BB	AA	AA	AA	-	AA	BB	AA	BB	BB	AA	AA	BB	BB	AA	BB	BB	AA	-	BB	BB	BB	BB	BB	AA	AA	BB	BB	BB	BB	BB	BB	AA	AA	AA	AA	BB	BB	AA	AA	AA	BB	BB
IWA6471	wsnp_Ku_c12698_20441325	[A/G]	AA	BB	AA	BB	BB	AA	BB	BB	AA	AA	AA	BB	AA	AA	BB	AA	BB	BB	AA	AA	BB	BB	AA	AA	AA	AA	BB	BB	AA	AA	AA	BB	AA	BB	AA	AA	AA	BB	-	AA	AA	BB	BB	AA	AA	AA	BB
IWA6576	wsnp_Ku_c16022_24798741	[A/G]	AA	BB	BB	BB	AA	BB	BB	BB	BB	AA	AA	BB	-	AA	AA	AA	BB	AA	BB	AA	AA	-	BB	AA	AA	BB	BB	BB	BB	AA	AA	AA	AA	AA	AA	BB	AA	BB	AA	BB	AA	AA	BB	AA	BB	AA	BB
IWA6596	wsnp_Ku_c16432_25320146	[T/C]	AA	BB	AA	AA	BB	AA	AA	AA	AA	BB	AA	AA	AA	AA	AA	BB	AA	BB	AA	AA	BB	AA	BB	AA	BB	AA	BB	AA	BB	BB	BB	AA	BB	AA	BB	AA	-	AA	BB	AA	AA	-	AA	AA	BB	AA	BB
IWA6621	wsnp_Ku_c17177_26216230	[A/G]	AA	BB	BB	AA	AA	AA	-	AA	BB	AA	AA	AA	AA	BB	AA	BB	BB	BB	BB	AA	AA	AA	BB	AA	AA	BB	BB	AA	AA	BB	AA	BB	AA	BB	BB	AA	AA	AA	AA	AA	AA	BB	AA	BB	AA	BB	BB
IWA6667	wsnp_Ku_c19037_28455905	[A/G]	AA	BB	BB	BB	AA	AA	BB	BB	AA	AA	BB	AA	BB	AA	BB	BB	AA	BB	AA	BB	AA	AA	BB	AA	BB	BB	BB	BB	AA	AA	BB	BB	BB	BB	BB	AA	BB	AA	BB	BB	BB	AA	AA	BB	BB	BB	BB
IWA6689	wsnp_Ku_c20701_30355248	[A/G]	AA	BB	-	AA	-	AA	BB	BB	AA	-	BB	AA	AA	AA	AA	BB	BB	BB	BB	BB	AA	AA	BB	BB	AA	BB	AA	AA	AA	BB	BB	AA	AA	AA	AA	BB	AA	BB	BB	BB	BB	AA	BB	AA	AA	BB	BB
IWA6718	wsnp_Ku_c21770_31551190	[T/C]	AA	BB	BB	BB	BB	-	BB	BB	BB	BB	AA	BB	AA	BB	AA	BB	BB	BB	-	BB	BB	BB	AA	AA	AA	AA	AA	-	AA	AA	BB	BB	AA	AA	-	BB	AA	AA	AA	BB	-	BB	BB	AA	AA	BB	AA
IWA6731	wsnp_Ku_c23096_32987510	[A/G]	AA	BB	AA	AA	BB	AA	AA	AA	-	AA	-	AA	AA	BB	BB	AA	BB	BB	BB	AA	AA	BB	AA	BB	AA	BB	BB	BB	BB	AA	AA	BB	AA	BB	BB	AA	AA	BB	-	AA	AA	BB	AA	BB	AA	AA	BB
IWA6750	wsnp_Ku_c23901_33846711	[T/C]	AA	BB	BB	AA	BB	BB	AA	BB	BB	AA	BB	BB	BB	AA	BB	BB	AA	AA	AA	AA	AA	AA	AA	BB	AA	BB	AA	BB	AA	AA	BB	BB	AA	BB	BB	AA	BB	BB	BB	AA	AA	BB	AA	AA	BB	BB	BB
IWA6828	wsnp_Ku_c27456_37405832	[T/C]	AA	BB	AA	AA	BB	AA	AA	BB	BB	BB	BB	AA	BB	BB	AA	BB	BB	BB	AA	BB	BB	AA	BB	BB	BB	BB	BB	BB	AA	BB	BB	BB	BB	BB	BB	BB	AA	AA	AA	AA	BB	BB	AA	-	AA	BB	BB
IWA6853	wsnp_Ku_c28854_38769308	[A/G]	AA	BB	BB	BB	AA	AA	BB	AA	BB	BB	AA	BB	BB	AA	BB	AA	BB	BB	AA	BB	BB	AA	BB	BB	AA	BB	BB	BB	AA	AA	AA	AA	AA	BB	AA	BB	BB	AA	AA	BB	BB	AA	BB	AA	BB	BB	BB
IWA6889	wsnp_Ku_c3097_5801027	[T/G]	AA	BB	BB	AA	AA	AA	-	AA	-	AA	AA	AA	AA	BB	AA	BB	BB	BB	BB	AA	AA	AA	BB	AA	AA	BB	BB	AA	AA	BB	AA	BB	AA	BB	BB	AA	AA	AA	AA	AA	AA	BB	AA	BB	AA	BB	BB
IWA6931	wsnp_Ku_c33884_43306422	[T/C]	AA	BB	AA	AA	AA	BB	AA	AA	BB	BB	AA	BB	BB	BB	BB	AA	AA	BB	AA	BB	BB	BB	BB	AA	AA	AA	AA	AA	AA	AA	-	BB	AA	AA	BB	AA	AA	AA	BB	-	BB	BB	BB	BB	AA	BB	BB
IWA6958	wsnp_Ku_c36658_45640758	[T/C]	AA	BB	BB	BB	BB	BB	AA	AA	BB	BB	BB	AA	BB	BB	BB	BB	BB	AA	BB	AA	BB	BB	BB	BB	BB	AA	BB	BB	BB	BB	BB	AA	BB	BB	BB	BB	AA	BB	BB	BB	AA	BB	AA	BB	AA	BB	BB
IWA7004	wsnp_Ku_c39289_47757996	[T/C]	AA	BB	BB	BB	BB	BB	BB	-	BB	BB	BB	AA	-	BB	BB	-	AA	-	BB	AA	BB	BB	BB	AA	AA	AA	BB	BB	BB	AA	AA	BB	AA	BB	BB	AA	BB	AA	AA	BB	BB	BB	BB	BB	AA	BB	AA
IWA7024	wsnp_Ku_c40334_48581010	[T/C]	AA	BB	AA	AA	BB	AA	BB	AA	BB	BB	AA	BB	AA	BB	AA	BB	BB	BB	AA	BB	AA	BB	AA	AA	AA	AA	AA	AA	AA	AA	BB	BB	AA	AA	-	BB	AA	AA	AA	AA	BB	AA	BB	AA	AA	BB	BB
IWA7091	wsnp_Ku_c4603_8305972	[A/C]	AA	BB	BB	BB	AA	AA	BB	AA	BB	BB	AA	BB	BB	AA	-	AA	BB	BB	AA	BB	BB	AA	BB	BB	AA	BB	AA	BB	BB	AA	AA	AA	AA	BB	AA	BB	BB	AA	AA	BB	BB	AA	BB	AA	-	BB	AA
IWA7134	wsnp_Ku_c50991_56423610	[T/C]	AA	BB	BB	AA	BB	BB	AA	BB	BB	BB	BB	AA	BB	AA	-	AA	BB	AA	AA	BB	BB	BB	AA	AA	AA	AA	AA	AA	AA	AA	AA	BB	BB	AA	AA	-	AA	BB	BB	AA	BB	AA	BB	AA	-	BB	BB
IWA7173	wsnp_Ku_c557_1166684	[T/C]	AA	BB	BB	AA	AA	BB	BB	BB	AA	AA	-	-	AA	AA	AA	AA	AA	BB	BB	BB	BB	-	AA	AA	AA	BB	BB	AA	BB	BB	AA	BB	BB	BB	BB	BB	AA	AA	AA	BB	BB	AA	-	AA	AA	BB	AA
IWA7174	wsnp_Ku_c55746_59522526	[T/C]	AA	BB	AA	BB	BB	AA	BB	BB	AA	AA	AA	BB	AA	AA	BB	AA	AA	BB	AA	AA	BB	BB	AA	AA	AA	AA	BB	BB	BB	AA	AA	BB	AA	BB	AA	AA	AA	AA	AA	AA	AA	BB	BB	AA	AA	AA	BB
IWA7182	wsnp_Ku_c5687_10068945	[T/C]	AA	BB	BB	AA	AA	BB	AA	BB	BB	AA	BB	BB	AA	AA	BB	BB	AA	BB	BB	BB	BB	AA	AA	BB	AA	AA	AA	BB	BB	AA	BB	AA	BB	BB	AA	AA	BB	BB	AA	BB	BB	BB	BB	BB	BB	BB	BB
IWA7223	wsnp_Ku_c64203_64579087	[A/G]	AA	BB	AA	BB	AA	BB	BB	BB	BB	BB	BB	AA	BB	-	AA	BB	AA	BB	BB	BB	AA	BB	BB	AA	AA	BB	AA	AA	BB	BB	BB	AA	BB	AA	BB	BB	BB	BB	AA	AA	BB	AA	BB	AA	BB	BB	AA
IWA7271	wsnp_Ku_c7197_12439730	[T/C]	AA	BB	BB	AA	BB	BB	AA	BB	BB	BB	BB	AA	-	AA	-	AA	BB	AA	AA	BB	BB	BB	AA	AA	AA	AA	AA	AA	AA	AA	AA	BB	BB	AA	AA	-	AA	BB	BB	AA	BB	AA	BB	AA	-	BB	BB
IWA7304	wsnp_Ku_c792_1635317	[T/C]	AA	BB	BB	BB	AA	BB	BB	BB	BB	AA	AA	BB	AA	BB	AA	AA	BB	AA	AA	AA	AA	BB	BB	AA	BB	-	BB	BB	BB	BB	AA	AA	BB	BB	-	BB	BB	BB	BB	BB	-	AA	BB	BB	BB	AA	BB
IWA7411	wsnp_Ku_rep_c104382_90867406	[A/G]	AA	BB	AA	AA	BB	AA	AA	BB	-	-	BB	AA	BB	BB	AA	BB	-	BB	AA	-	BB	AA	-	BB	BB	BB	BB	AA	AA	BB	BB	BB	BB	BB	BB	BB	AA	AA	AA	AA	BB	BB	AA	-	AA	BB	BB
IWA7497	wsnp_Ku_rep_c71567_71302229	[T/C]	AA	BB	BB	BB	AA	AA	BB	-	-	BB	AA	BB	BB	AA	-	AA	BB	BB	AA	BB	BB	AA	BB	BB	AA	BB	BB	BB	BB	BB	AA	AA	AA	BB	AA	BB	BB	AA	AA	BB	BB	-	BB	AA	BB	BB	AA
IWA7498	wsnp_Ku_rep_c71567_71302766	[T/C]	AA	BB	BB	BB	AA	AA	BB	-	-	BB	AA	BB	BB	AA	-	AA	BB	BB	AA	BB	BB	AA	BB	BB	AA	BB	BB	BB	BB	BB	AA	AA	AA	BB	AA	BB	BB	AA	AA	BB	BB	-	BB	AA	BB	BB	AA
IWA7559	wsnp_Ra_c11211_18227610	[T/G]	AA	BB	BB	BB	AA	AA	AA	AA	AA	AA	BB	BB	AA	AA	AA	BB	AA	AA	AA	BB	AA	BB	BB	BB	BB	AA	BB	AA	AA	BB	AA	BB	AA	BB	BB	AA	BB	BB	BB	BB	BB	AA	AA	AA	AA	AA	AA
IWA7574	wsnp_Ra_c11942_19247669	[T/C]	AA	BB	BB	BB	BB	BB	AA	BB	BB	BB	BB	BB	BB	BB	BB	BB	BB	AA	BB	BB	BB	BB	BB	BB	BB	-	BB	BB	BB	BB	BB	BB	BB	BB	BB	BB	AA	BB	BB	BB	AA	BB	BB	BB	-	BB	BB
IWA7596	wsnp_Ra_c13_24540	[A/G]	AA	BB	BB	AA	BB	BB	BB	-	BB	AA	AA	AA	AA	BB	AA	BB	BB	BB	AA	AA	BB	AA	AA	AA	AA	AA	AA	BB	AA	BB	AA	BB	AA	AA	AA	AA	BB	BB	-	BB	AA	AA	AA	BB	AA	AA	BB
IWA7628	wsnp_Ra_c14498_22667649	[T/C]	AA	BB	BB	BB	BB	BB	AA	BB	BB	BB	BB	BB	BB	BB	BB	BB	BB	AA	BB	BB	BB	BB	BB	BB	BB	-	BB	BB	BB	BB	BB	BB	BB	BB	BB	BB	AA	BB	BB	BB	AA	BB	BB	BB	-	BB	BB
IWA7688	wsnp_Ra_c18498_27571740	[T/C]	AA	BB	AA	AA	BB	AA	AA	BB	AA	-	BB	AA	BB	BB	AA	BB	-	BB	AA	-	BB	AA	-	-	BB	BB	BB	AA	AA	BB	BB	BB	BB	BB	BB	-	AA	AA	AA	AA	BB	BB	AA	-	AA	BB	BB
IWA7777	wsnp_Ra_c24707_34262900	[A/G]	AA	BB	BB	AA	BB	BB	BB	AA	BB	AA	AA	AA	AA	BB	AA	BB	BB	BB	AA	BB	BB	AA	AA	AA	AA	AA	AA	BB	AA	BB	AA	BB	AA	BB	AA	AA	BB	BB	AA	BB	AA	AA	AA	BB	AA	AA	BB
IWA7786	wsnp_Ra_c25255_34824465	[A/G]	AA	BB	BB	BB	BB	BB	AA	AA	BB	BB	BB	AA	BB	BB	BB	BB	BB	AA	BB	AA	BB	BB	BB	BB	BB	AA	BB	BB	BB	BB	BB	AA	BB	BB	BB	BB	AA	BB	BB	BB	AA	BB	AA	BB	AA	BB	BB
IWA7818	wsnp_Ra_c27839_37354085	[T/C]	AA	BB	BB	BB	BB	BB	AA	BB	BB	BB	BB	BB	BB	BB	BB	BB	BB	AA	BB	BB	BB	BB	BB	BB	BB	-	BB	BB	BB	-	BB	-	BB	BB	BB	BB	AA	BB	BB	BB	AA	BB	BB	BB	-	BB	BB
IWA7877	wsnp_Ra_c34117_42876812	[T/G]	AA	BB	BB	AA	BB	BB	AA	BB	BB	AA	BB	BB	BB	AA	BB	BB	AA	AA	AA	AA	AA	AA	AA	BB	AA	BB	AA	BB	AA	AA	BB	BB	AA	BB	BB	AA	BB	BB	BB	AA	AA	BB	AA	AA	BB	BB	BB
IWA7896	wsnp_Ra_c3766_6947263	[T/C]	AA	BB	BB	BB	BB	BB	AA	AA	BB	BB	BB	AA	BB	BB	BB	BB	BB	AA	BB	AA	BB	BB	BB	BB	BB	AA	BB	BB	BB	BB	BB	AA	BB	BB	BB	BB	AA	BB	BB	BB	AA	BB	AA	BB	AA	BB	BB
IWA7902	wsnp_Ra_c38406_46321726	[T/C]	AA	BB	BB	AA	AA	BB	AA	BB	AA	-	AA	BB	AA	AA	AA	AA	AA	AA	BB	AA	AA	BB	BB	AA	BB	BB	AA	AA	AA	AA	AA	BB	BB	AA	AA	-	AA	AA	AA	AA	BB	AA	BB	BB	AA	AA	AA
IWA7938	wsnp_Ra_c4373_7946257	[T/C]	AA	BB	AA	AA	BB	BB	BB	BB	BB	BB	BB	BB	BB	AA	AA	AA	AA	BB	AA	BB	BB	AA	BB	AA	BB	BB	BB	AA	BB	BB	AA	AA	AA	BB	AA	AA	BB	BB	AA	AA	AA	AA	AA	AA	AA	AA	AA
IWA7999	wsnp_Ra_c5454_9660102	[A/G]	AA	BB	BB	AA	AA	BB	AA	BB	AA	-	AA	BB	AA	AA	AA	AA	AA	AA	BB	AA	AA	BB	BB	AA	BB	BB	AA	AA	AA	AA	AA	BB	BB	AA	AA	-	AA	AA	AA	AA	BB	AA	BB	BB	AA	AA	AA
IWA8043	wsnp_Ra_c67016_65144188	[A/G]	AA	BB	BB	AA	AA	BB	AA	AA	AA	AA	AA	AA	BB	AA	BB	BB	AA	AA	AA	AA	AA	BB	AA	AA	BB	BB	BB	AA	AA	AA	AA	AA	BB	AA	AA	AA	AA	AA	BB	BB	BB	AA	BB	BB	AA	AA	AA
IWA8135	wsnp_Ra_rep_c108284_91604017	[A/G]	AA	BB	AA	AA	BB	AA	BB	AA	BB	AA	AA	BB	BB	AA	BB	AA	AA	BB	AA	BB	BB	BB	AA	AA	BB	-	BB	BB	BB	AA	BB	BB	BB	AA	BB	BB	BB	AA	AA	BB	BB	-	AA	AA	BB	BB	AA
IWA8184	wsnp_Ra_rep_c72450_70610212	[A/G]	AA	BB	BB	BB	BB	BB	AA	BB	BB	BB	BB	BB	BB	BB	BB	BB	BB	AA	BB	BB	BB	BB	BB	BB	BB	-	BB	BB	BB	BB	BB	BB	BB	BB	BB	BB	AA	BB	BB	BB	AA	BB	BB	BB	BB	BB	BB
IWA8232	wsnp_RFL_Contig1205_284961	[A/G]	AA	BB	BB	-	AA	AA	BB	BB	AA	AA	BB	AA	BB	AA	BB	-	AA	BB	AA	BB	AA	AA	BB	AA	BB	BB	BB	BB	AA	AA	BB	BB	BB	BB	BB	AA	BB	AA	BB	BB	BB	AA	AA	BB	BB	BB	BB
IWA8269	wsnp_RFL_Contig1910_1074716	[T/C]	AA	BB	AA	AA	BB	AA	AA	BB	AA	AA	BB	BB	BB	BB	AA	BB	BB	BB	AA	AA	BB	AA	BB	AA	BB	BB	BB	AA	AA	AA	BB	AA	BB	BB	BB	AA	AA	AA	AA	BB	BB	BB	AA	AA	AA	BB	AA
IWA8386	wsnp_RFL_Contig2765_2513854	[A/G]	AA	BB	BB	BB	AA	AA	BB	AA	BB	BB	AA	BB	BB	AA	BB	AA	BB	BB	AA	BB	BB	AA	BB	BB	AA	BB	AA	BB	AA	AA	AA	AA	AA	BB	AA	BB	BB	AA	AA	BB	BB	AA	BB	AA	BB	BB	AA
IWA8418	wsnp_RFL_Contig3054_2955094	[T/C]	AA	BB	BB	-	AA	AA	BB	BB	AA	AA	BB	AA	BB	AA	BB	-	AA	BB	AA	BB	AA	AA	BB	BB	BB	BB	BB	AA	AA	AA	BB	AA	BB	BB	BB	AA	BB	AA	BB	BB	BB	AA	AA	BB	BB	BB	BB
IWA8438	wsnp_RFL_Contig3175_3154256	[A/G]	AA	BB	BB	BB	AA	AA	BB	AA	BB	BB	AA	BB	BB	AA	BB	AA	BB	BB	AA	BB	BB	AA	BB	BB	AA	BB	AA	BB	AA	AA	AA	AA	AA	BB	AA	BB	BB	AA	AA	BB	BB	AA	BB	AA	BB	BB	AA
IWA8456	wsnp_RFL_Contig3316_3390729	[T/C]	AA	BB	BB	-	BB	AA	AA	BB	AA	AA	BB	AA	BB	AA	BB	AA	AA	AA	AA	AA	AA	BB	BB	BB	AA	BB	BB	AA	BB	AA	BB	AA	BB	AA	BB	AA	BB	AA	BB	BB	BB	AA	AA	BB	BB	BB	BB
IWA8592	wsnp_RFL_Contig4424_5193532	[T/C]	AA	BB	AA	AA	BB	AA	BB	AA	AA	BB	AA	AA	AA	AA	AA	BB	AA	BB	AA	AA	BB	AA	BB	AA	BB	AA	BB	AA	BB	BB	BB	AA	BB	AA	BB	AA	AA	AA	BB	AA	AA	AA	AA	AA	BB	AA	BB
IWA8602	wsnp_RFL_Contig4557_5390605	[A/G]	AA	BB	BB	-	AA	AA	BB	AA	AA	BB	AA	BB	BB	AA	-	BB	BB	BB	BB	BB	BB	AA	AA	AA	AA	BB	BB	BB	AA	BB	AA	AA	AA	BB	AA	BB	BB	AA	AA	AA	BB	BB	BB	BB	BB	AA	BB
IWA8603	wsnp_RFL_Contig4565_5399994	[A/G]	AA	BB	-	-	-	AA	BB	BB	-	-	BB	AA	AA	-	AA	BB	BB	BB	BB	BB	AA	AA	BB	BB	AA	BB	AA	AA	AA	BB	BB	AA	AA	AA	AA	BB	AA	BB	-	BB	BB	AA	BB	AA	AA	BB	BB
IWA8619	wsnp_RFL_Contig4726_5654774	[T/C]	AA	BB	AA	AA	AA	AA	-	AA	-	AA	AA	AA	AA	BB	BB	AA	BB	BB	-	AA	AA	BB	BB	AA	AA	BB	BB	BB	AA	AA	AA	BB	AA	BB	BB	AA	AA	BB	BB	AA	AA	AA	AA	BB	AA	AA	BB
IWA33	wsnp_BE403597A_Ta_2_2	[A/G]	AA	BB	AA	AA	BB	AA	BB	AA	BB	AA	AA	AA	AA	AA	-	BB	AA	BB	AA	BB	BB	AA	BB	BB	BB	BB	AA	BB	AA	BB	AA	AA	BB	BB	AA	AA	BB	BB	AA	BB	BB	-	AA	BB	BB	AA	AA
IWA69	wsnp_BE406351A_Ta_2_1	[T/G]	AA	BB	AA	AA	BB	AA	BB	AA	BB	AA	AA	AA	AA	AA	BB	BB	AA	BB	AA	BB	BB	AA	BB	BB	BB	BB	AA	BB	AA	BB	AA	AA	BB	BB	AA	AA	BB	BB	AA	BB	BB	BB	AA	BB	BB	AA	AA
IWA126	wsnp_BE443291A_Ta_2_1	[T/C]	AA	BB	BB	AA	BB	BB	AA	BB	BB	BB	BB	AA	BB	AA	-	AA	BB	AA	AA	BB	BB	BB	AA	AA	AA	AA	AA	AA	AA	AA	AA	BB	BB	AA	AA	-	AA	BB	BB	AA	BB	AA	BB	AA	-	BB	BB
IWA130	wsnp_BE443521B_Ta_2_1	[A/G]	AA	BB	AA	BB	BB	AA	AA	AA	AA	BB	BB	AA	BB	BB	AA	AA	AA	AA	AA	BB	AA	BB	BB	-	BB	BB	AA	BB	BB	AA	AA	AA	AA	AA	AA	AA	BB	AA	BB	BB	BB	BB	BB	BB	BB	AA	AA
IWA172	wsnp_BE445427A_Ta_2_1	[T/C]	AA	BB	BB	AA	BB	BB	AA	BB	BB	BB	BB	AA	-	AA	-	AA	BB	AA	AA	-	BB	BB	AA	AA	AA	AA	AA	AA	AA	AA	AA	BB	BB	AA	AA	-	AA	BB	BB	AA	BB	AA	BB	AA	-	BB	BB
IWA174	wsnp_BE445431A_Td_2_2	[T/G]	AA	BB	AA	AA	AA	AA	AA	AA	BB	BB	AA	BB	BB	BB	AA	AA	AA	BB	AA	BB	BB	BB	BB	BB	AA	AA	AA	BB	AA	AA	AA	-	BB	AA	BB	AA	AA	BB	BB	AA	BB	AA	AA	BB	BB	BB	AA
IWA189	wsnp_BE446240B_Ta_2_3	[A/G]	AA	BB	AA	AA	AA	AA	AA	AA	BB	AA	-	AA	AA	BB	BB	AA	BB	BB	BB	AA	AA	BB	BB	AA	AA	BB	BB	BB	AA	AA	AA	BB	AA	BB	BB	AA	AA	BB	-	AA	AA	AA	AA	BB	AA	AA	BB
IWA200	wsnp_be471201A_Ta_1_1	[A/G]	AA	BB	AA	AA	AA	AA	BB	AA	BB	BB	AA	BB	BB	BB	AA	AA	AA	BB	AA	BB	BB	AA	BB	BB	AA	BB	BB	AA	AA	AA	AA	AA	BB	AA	BB	AA	AA	BB	BB	AA	BB	-	AA	-	BB	BB	AA
IWA221	wsnp_BE490200B_Ta_2_1	[A/G]	AA	BB	AA	AA	BB	BB	AA	BB	BB	BB	AA	BB	BB	BB	BB	BB	BB	AA	BB	BB	BB	BB	BB	BB	BB	-	BB	BB	BB	BB	BB	-	BB	BB	BB	BB	AA	AA	BB	AA	AA	AA	BB	BB	BB	BB	BB
IWA232	wsnp_BE490599A_Ta_2_1	[T/C]	AA	BB	BB	AA	BB	BB	AA	BB	BB	BB	BB	AA	-	AA	-	AA	BB	AA	AA	-	BB	BB	AA	AA	AA	AA	AA	AA	AA	AA	AA	BB	BB	AA	AA	-	AA	BB	BB	AA	BB	AA	-	AA	-	BB	BB
IWA261	wsnp_BE495175A_Ta_1_1	[T/C]	AA	BB	BB	AA	AA	BB	AA	BB	AA	AA	AA	BB	BB	AA	BB	BB	AA	AA	AA	-	AA	-	AA	AA	BB	BB	BB	AA	AA	AA	AA	BB	BB	AA	AA	AA	AA	AA	BB	AA	BB	AA	BB	BB	AA	AA	BB
IWA289	wsnp_BE497169B_Ta_2_2	[T/G]	AA	BB	AA	BB	BB	BB	AA	BB	BB	AA	BB	BB	AA	-	BB	AA	AA	BB	AA	AA	BB	BB	AA	AA	AA	AA	AA	BB	BB	AA	AA	BB	AA	BB	AA	AA	AA	AA	AA	BB	-	BB	BB	AA	AA	AA	BB
IWA295	wsnp_BE497494B_Ta_2_1	[A/C]	AA	BB	BB	-	BB	BB	BB	BB	BB	AA	AA	BB	BB	AA	-	AA	-	AA	AA	BB	BB	BB	BB	BB	AA	BB	BB	BB	-	BB	-	AA	AA	AA	BB	AA	BB	BB	AA	BB	BB	AA	-	AA	BB	BB	AA
IWA374	wsnp_BE591290B_Ta_2_7	[A/G]	AA	BB	AA	AA	AA	BB	BB	BB	BB	BB	BB	AA	AA	BB	AA	AA	-	AA	BB	AA	BB	BB	BB	-	AA	BB	-	-	AA	BB	AA	BB	AA	AA	BB	BB	AA	BB	AA	AA	AA	AA	BB	BB	BB	AA	BB
IWA425	wsnp_BF201652B_Td_2_1	[A/G]	AA	BB	BB	-	AA	AA	BB	BB	AA	AA	BB	AA	BB	AA	BB	-	AA	BB	AA	BB	AA	AA	BB	AA	BB	BB	BB	BB	AA	AA	BB	BB	BB	BB	BB	AA	BB	AA	BB	BB	BB	AA	AA	BB	BB	BB	BB
IWA504	wsnp_BF483091A_Ta_2_5	[T/C]	AA	BB	BB	BB	AA	AA	BB	AA	BB	BB	AA	BB	BB	AA	BB	AA	BB	BB	AA	BB	BB	AA	BB	BB	AA	BB	AA	BB	AA	AA	AA	AA	AA	BB	AA	BB	BB	AA	AA	BB	BB	AA	BB	AA	BB	BB	BB
IWA593	wsnp_BM134363A_Ta_2_4	[A/G]	AA	BB	BB	BB	BB	AA	BB	BB	AA	BB	AA	-	AA	AA	AA	AA	BB	AA	AA	AA	AA	AA	AA	BB	BB	-	BB	BB	BB	AA	BB	AA	BB	AA	AA	BB	BB	BB	BB	BB	AA	AA	BB	AA	BB	BB	AA
IWA682	wsnp_CAP11_c1656_909791	[A/G]	AA	BB	BB	BB	BB	BB	BB	BB	BB	BB	BB	AA	BB	BB	BB	-	AA	-	BB	AA	BB	BB	BB	AA	AA	AA	BB	BB	BB	AA	AA	BB	AA	BB	BB	AA	BB	AA	AA	BB	BB	BB	BB	BB	AA	BB	AA
IWA716	wsnp_CAP11_c232_212121	[A/G]	AA	BB	AA	BB	BB	BB	AA	BB	BB	AA	BB	BB	AA	AA	BB	AA	AA	BB	AA	AA	BB	BB	AA	AA	AA	AA	AA	BB	BB	AA	AA	BB	AA	BB	AA	AA	AA	AA	AA	BB	AA	BB	BB	BB	AA	AA	BB
IWA736	wsnp_CAP11_c298_250735	[T/C]	AA	BB	BB	BB	AA	BB	BB	BB	BB	AA	AA	BB	-	AA	AA	AA	BB	AA	BB	AA	BB	-	BB	AA	AA	BB	BB	BB	BB	AA	AA	AA	AA	AA	AA	BB	AA	BB	AA	BB	AA	AA	BB	AA	BB	AA	BB
IWA757	wsnp_CAP11_c3658_1764767	[T/C]	AA	BB	AA	AA	BB	BB	BB	AA	AA	BB	BB	AA	AA	-	AA	BB	AA	BB	-	AA	AA	-	AA	AA	BB	BB	AA	AA	AA	BB	BB	BB	BB	AA	AA	BB	BB	BB	AA	AA	AA	AA	-	BB	AA	BB	BB
IWA762	wsnp_CAP11_c3947_1866837	[A/G]	AA	BB	BB	BB	BB	BB	BB	BB	BB	AA	AA	BB	BB	AA	BB	AA	BB	AA	AA	BB	BB	BB	BB	BB	AA	BB	BB	BB	BB	BB	-	-	AA	AA	BB	AA	BB	BB	AA	BB	BB	AA	-	AA	BB	BB	AA
IWA848	wsnp_CAP11_rep_c4138_1957470	[T/C]	AA	BB	AA	-	AA	BB	BB	BB	BB	BB	BB	AA	AA	BB	AA	AA	-	AA	BB	AA	BB	BB	AA	-	AA	BB	-	-	AA	BB	AA	BB	AA	AA	BB	BB	AA	BB	AA	AA	AA	AA	-	BB	BB	AA	BB
IWA1049	wsnp_CAP7_c1839_908011	[T/C]	AA	BB	AA	AA	BB	AA	BB	AA	AA	BB	AA	AA	AA	BB	AA	BB	-	BB	AA	AA	BB	AA	BB	AA	BB	AA	BB	BB	BB	BB	BB	AA	BB	AA	BB	AA	AA	AA	BB	AA	BB	AA	-	AA	BB	BB	BB
IWA1050	wsnp_CAP7_c1839_908093	[A/G]	AA	BB	AA	AA	BB	AA	BB	AA	AA	BB	AA	AA	AA	BB	AA	BB	-	BB	AA	AA	BB	AA	BB	AA	BB	AA	BB	BB	BB	BB	BB	AA	BB	AA	BB	AA	AA	AA	BB	AA	BB	AA	AA	AA	BB	BB	BB
IWA1114	wsnp_CAP7_rep_c12606_5316797	[A/G]	AA	BB	BB	BB	BB	BB	BB	BB	BB	AA	AA	BB	BB	AA	BB	AA	BB	AA	AA	BB	BB	BB	BB	BB	AA	BB	BB	BB	BB	BB	-	AA	AA	AA	BB	AA	BB	BB	AA	BB	BB	AA	-	AA	BB	BB	AA
IWA1233	wsnp_CAP8_rep_c4776_2319078	[A/C]	AA	BB	BB	BB	BB	-	BB	BB	BB	AA	BB	AA	AA	AA	BB	BB	AA	AA	BB	BB	BB	BB	BB	BB	AA	BB	AA	BB	BB	AA	BB	-	AA	BB	AA	BB	BB	AA	BB	AA	BB	AA	AA	AA	AA	BB	BB
IWA1338	wsnp_Ex_c1050_2009301	[T/G]	AA	BB	AA	AA	BB	BB	BB	AA	AA	AA	BB	BB	AA	AA	AA	BB	BB	BB	AA	AA	BB	AA	BB	AA	BB	AA	AA	BB	BB	BB	BB	BB	BB	AA	AA	AA	AA	AA	BB	AA	BB	AA	AA	AA	BB	BB	-
IWA1594	wsnp_Ex_c12165_19452361	[T/C]	AA	BB	BB	AA	AA	AA	BB	BB	AA	AA	BB	AA	AA	BB	AA	AA	AA	BB	BB	BB	BB	-	AA	AA	AA	BB	BB	AA	BB	BB	AA	BB	BB	BB	BB	BB	AA	AA	AA	BB	BB	AA	BB	AA	AA	BB	AA
IWA1664	wsnp_Ex_c12671_20140014	[T/C]	AA	BB	BB	BB	BB	BB	BB	BB	BB	AA	AA	BB	BB	AA	BB	AA	BB	AA	AA	BB	BB	BB	BB	BB	AA	BB	BB	BB	BB	BB	-	-	AA	AA	BB	AA	BB	BB	AA	BB	BB	AA	-	AA	BB	BB	AA
IWA1685	wsnp_Ex_c1279_2451582	[A/C]	AA	BB	BB	BB	AA	BB	AA	AA	AA	AA	AA	AA	AA	AA	BB	BB	BB	AA	AA	AA	BB	AA	AA	AA	BB	BB	AA	BB	AA	AA	AA	BB	BB	BB	AA	AA	-	BB	BB	BB	-	AA	BB	BB	BB	AA	BB
IWA1873	wsnp_Ex_c14192_22135125	[T/C]	AA	BB	AA	AA	BB	AA	BB	AA	AA	BB	AA	AA	AA	BB	AA	BB	-	BB	AA	AA	BB	AA	BB	AA	BB	AA	BB	BB	BB	BB	BB	AA	BB	AA	BB	AA	AA	AA	BB	AA	BB	AA	-	AA	BB	BB	BB
IWA2306	wsnp_Ex_c1838_3461594	[A/G]	AA	BB	BB	BB	BB	AA	BB	AA	BB	BB	AA	BB	AA	BB	AA	BB	BB	BB	BB	BB	BB	BB	AA	AA	AA	AA	AA	AA	AA	AA	BB	BB	AA	AA	-	AA	AA	AA	AA	AA	BB	BB	BB	AA	AA	BB	BB
IWA2567	wsnp_Ex_c21010_30133755	[A/G]	AA	BB	BB	BB	AA	AA	BB	-	BB	BB	AA	BB	BB	AA	-	AA	BB	BB	AA	BB	BB	AA	BB	BB	AA	BB	AA	BB	BB	AA	AA	AA	AA	BB	AA	BB	BB	AA	AA	BB	BB	AA	BB	AA	BB	BB	AA
IWA2568	wsnp_Ex_c2103_3947695	[A/G]	AA	BB	BB	-	BB	AA	AA	BB	AA	AA	AA	AA	AA	AA	BB	AA	AA	AA	AA	AA	BB	BB	BB	BB	AA	BB	AA	AA	BB	AA	BB	AA	AA	AA	BB	AA	BB	BB	BB	BB	BB	BB	AA	BB	BB	BB	AA
IWA2690	wsnp_Ex_c22149_31337068	[A/G]	AA	BB	BB	AA	BB	BB	AA	BB	BB	BB	BB	BB	BB	AA	BB	BB	AA	AA	BB	AA	AA	AA	AA	AA	AA	BB	AA	BB	AA	BB	AA	BB	AA	BB	BB	AA	BB	BB	BB	AA	AA	BB	AA	BB	BB	BB	BB
IWA2975	wsnp_Ex_c25505_34771897	[T/C]	AA	BB	BB	BB	BB	BB	AA	AA	BB	BB	BB	AA	BB	BB	BB	BB	BB	AA	BB	AA	BB	BB	BB	BB	BB	AA	BB	BB	BB	BB	BB	AA	BB	BB	BB	BB	AA	BB	BB	BB	AA	BB	AA	BB	AA	BB	BB
IWA3031	wsnp_Ex_c26213_35462685	[T/C]	AA	BB	BB	AA	AA	BB	AA	BB	AA	-	AA	BB	AA	AA	AA	AA	AA	AA	BB	AA	AA	BB	BB	AA	BB	BB	AA	AA	AA	AA	AA	BB	BB	AA	AA	-	AA	AA	AA	AA	BB	AA	BB	BB	AA	AA	AA
IWA103	wsnp_BE442666B_Ta_2_2	[T/C]	AA	BB	AA	AA	BB	AA	AA	BB	AA	AA	BB	BB	BB	BB	AA	BB	BB	BB	AA	BB	BB	BB	BB	AA	BB	BB	BB	AA	AA	AA	BB	AA	BB	BB	BB	AA	AA	AA	AA	BB	BB	BB	AA	AA	AA	BB	AA
IWA109	wsnp_BE442776A_Ta_2_1	[T/C]	AA	BB	BB	AA	BB	BB	AA	BB	BB	BB	BB	AA	BB	AA	BB	AA	BB	AA	AA	BB	BB	BB	AA	AA	AA	AA	AA	AA	AA	AA	AA	BB	BB	AA	AA	BB	AA	BB	BB	AA	BB	AA	BB	AA	BB	BB	BB
IWA63	wsnp_BE405834B_Ta_2_2	[T/C]	AA	BB	BB	AA	AA	AA	AA	AA	BB	BB	AA	AA	AA	BB	AA	BB	BB	BB	BB	AA	AA	AA	BB	AA	AA	BB	BB	BB	AA	AA	AA	BB	AA	BB	BB	AA	AA	BB	BB	AA	AA	BB	AA	BB	AA	BB	BB
IWA490	wsnp_BF475149A_Ta_2_1	[T/C]	AA	BB	BB	AA	AA	BB	BB	BB	AA	AA	-	AA	-	AA	AA	AA	AA	BB	BB	BB	BB	AA	AA	AA	AA	BB	BB	AA	BB	BB	AA	AA	BB	BB	BB	BB	BB	AA	BB	BB	BB	AA	AA	BB	AA	BB	AA
IWA997	wsnp_CAP12_rep_c3885_1758057	[A/G]	AA	BB	BB	BB	BB	BB	AA	BB	BB	BB	BB	BB	BB	BB	BB	BB	BB	AA	BB	BB	BB	BB	BB	BB	BB	BB	BB	BB	BB	BB	BB	BB	BB	BB	BB	BB	AA	BB	BB	BB	AA	BB	BB	BB	BB	BB	BB
IWA1214	wsnp_CAP8_c7723_3536264	[A/G]	AA	BB	BB	AA	BB	AA	BB	BB	AA	BB	BB	BB	BB	BB	AA	BB	AA	BB	AA	AA	BB	AA	BB	BB	BB	AA	BB	BB	AA	BB	AA	BB	AA	BB	BB	AA	BB	BB	AA	BB	AA	AA	AA	BB	AA	BB	AA
IWA1319	wsnp_Ex_c1039_1990833	[A/C]	AA	BB	BB	AA	BB	BB	AA	BB	BB	AA	BB	BB	BB	AA	BB	BB	AA	AA	AA	AA	AA	AA	AA	BB	AA	BB	AA	BB	AA	AA	BB	BB	AA	BB	BB	AA	BB	BB	BB	AA	AA	BB	AA	AA	BB	BB	BB
IWA1404	wsnp_Ex_c10903_17717179	[A/G]	AA	BB	BB	AA	AA	BB	AA	BB	BB	BB	BB	BB	BB	AA	BB	BB	AA	BB	BB	BB	BB	AA	BB	BB	AA	AA	AA	BB	BB	AA	BB	AA	BB	BB	BB	BB	BB	BB	AA	AA	BB	BB	AA	BB	BB	-	AA
IWA1437	wsnp_Ex_c11106_18003332	[T/C]	AA	BB	BB	AA	BB	AA	AA	BB	AA	AA	AA	AA	AA	AA	BB	AA	AA	AA	AA	AA	AA	BB	BB	BB	AA	BB	BB	AA	BB	AA	BB	AA	BB	AA	BB	AA	BB	AA	BB	BB	BB	BB	AA	BB	BB	BB	BB
IWA1585	wsnp_Ex_c12119_19382820	[T/C]	AA	BB	-	-	BB	AA	BB	BB	-	BB	BB	AA	AA	AA	AA	BB	BB	BB	BB	BB	AA	AA	BB	BB	AA	BB	AA	AA	AA	BB	BB	AA	AA	AA	AA	BB	AA	BB	BB	BB	BB	AA	BB	AA	AA	BB	BB
IWA1592	wsnp_Ex_c12152_19431363	[T/C]	AA	BB	BB	BB	AA	BB	BB	AA	AA	AA	AA	BB	AA	BB	AA	BB	BB	BB	AA	BB	BB	BB	AA	AA	AA	AA	AA	AA	AA	AA	BB	BB	AA	AA	AA	BB	AA	AA	AA	BB	BB	BB	BB	AA	AA	BB	AA
IWA1608	wsnp_Ex_c12336_19686808	[T/G]	AA	BB	BB	AA	AA	AA	BB	BB	AA	AA	-	AA	AA	BB	AA	AA	AA	BB	BB	BB	-	AA	AA	AA	AA	BB	BB	AA	BB	BB	AA	BB	BB	BB	BB	BB	AA	AA	AA	BB	BB	AA	-	AA	AA	BB	AA
IWA1628	wsnp_Ex_c12433_19826311	[T/C]	AA	BB	AA	BB	BB	BB	AA	BB	BB	BB	AA	AA	BB	BB	BB	BB	BB	AA	BB	-	BB	BB	BB	BB	BB	BB	BB	BB	BB	AA	BB	AA	AA	AA	BB	BB	AA	AA	BB	AA	BB	AA	BB	BB	AA	AA	AA
IWA1629	wsnp_Ex_c12433_19827016	[T/G]	AA	BB	AA	BB	BB	BB	AA	BB	BB	BB	AA	AA	BB	BB	BB	BB	BB	AA	BB	AA	BB	BB	BB	BB	BB	BB	BB	BB	BB	AA	BB	AA	AA	AA	BB	BB	AA	AA	BB	AA	BB	AA	BB	BB	AA	AA	AA
IWA1637	wsnp_Ex_c1247_2397552	[A/G]	AA	BB	BB	AA	AA	BB	AA	BB	AA	-	AA	AA	AA	AA	AA	AA	AA	AA	BB	AA	AA	BB	AA	AA	BB	BB	AA	AA	AA	AA	AA	BB	BB	AA	AA	BB	AA	AA	BB	AA	BB	AA	BB	BB	AA	AA	AA
IWA1904	wsnp_Ex_c14529_22547438	[T/G]	AA	BB	BB	AA	BB	BB	AA	BB	BB	BB	BB	AA	-	AA	AA	AA	BB	AA	AA	-	BB	BB	AA	AA	AA	AA	AA	AA	AA	AA	AA	BB	BB	AA	AA	AA	AA	BB	BB	AA	BB	AA	-	AA	AA	BB	BB
IWA2035	wsnp_Ex_c1557_2973321	[A/G]	AA	BB	BB	AA	AA	BB	AA	BB	BB	AA	BB	BB	AA	AA	BB	BB	AA	BB	BB	BB	BB	AA	AA	BB	AA	AA	AA	BB	BB	AA	BB	AA	BB	BB	AA	AA	BB	BB	AA	BB	BB	BB	BB	BB	BB	BB	BB
IWA2439	wsnp_Ex_c19602_28584250	[A/G]	AA	BB	BB	BB	BB	BB	AA	AA	BB	AA	AA	AA	BB	BB	BB	AA	BB	AA	BB	AA	BB	BB	BB	BB	BB	AA	BB	BB	BB	BB	BB	AA	BB	BB	BB	BB	AA	BB	AA	BB	AA	BB	AA	BB	AA	BB	BB
IWA2610	wsnp_Ex_c214_422365	[A/G]	AA	BB	BB	BB	BB	AA	AA	BB	BB	BB	BB	AA	AA	AA	AA	BB	BB	BB	BB	BB	AA	BB	BB	BB	AA	BB	AA	AA	AA	BB	BB	AA	AA	AA	BB	BB	AA	BB	BB	BB	BB	AA	BB	AA	BB	BB	AA
IWA2768	wsnp_Ex_c22963_32183009	[A/G]	AA	BB	BB	AA	AA	BB	BB	BB	AA	AA	BB	-	AA	AA	AA	AA	AA	BB	BB	BB	BB	BB	AA	AA	AA	BB	BB	AA	BB	BB	AA	AA	BB	BB	BB	BB	AA	-	BB	BB	BB	AA	BB	BB	AA	BB	AA
IWA2814	wsnp_Ex_c23509_32746806	[T/C]	AA	BB	AA	BB	BB	BB	BB	-	AA	BB	BB	AA	AA	BB	AA	BB	AA	BB	BB	AA	BB	AA	AA	AA	BB	BB	AA	BB	AA	BB	BB	BB	BB	AA	AA	BB	BB	BB	AA	AA	AA	AA	BB	BB	AA	BB	BB
IWA2892	wsnp_Ex_c2433_4556063	[T/G]	AA	BB	BB	BB	BB	BB	AA	AA	BB	AA	AA	AA	AA	AA	AA	BB	BB	BB	AA	AA	BB	AA	AA	AA	BB	AA	AA	BB	AA	BB	AA	BB	BB	BB	AA	AA	BB	BB	AA	BB	AA	AA	BB	BB	BB	AA	BB
IWA2938	wsnp_Ex_c24964_34219020	[A/C]	AA	BB	BB	AA	AA	BB	AA	AA	BB	BB	AA	BB	BB	BB	BB	AA	AA	BB	AA	BB	BB	BB	BB	AA	AA	AA	AA	AA	AA	AA	BB	BB	AA	AA	BB	AA	AA	AA	BB	BB	BB	BB	BB	BB	AA	BB	BB
IWA3192	wsnp_Ex_c2886_5325103	[T/C]	AA	BB	BB	BB	AA	BB	BB	BB	BB	AA	AA	BB	AA	BB	AA	AA	BB	AA	AA	AA	AA	BB	BB	AA	BB	AA	BB	BB	BB	BB	AA	AA	BB	BB	AA	BB	BB	BB	BB	BB	-	AA	BB	BB	BB	AA	BB
IWA3204	wsnp_Ex_c28973_38050405	[T/C]	AA	BB	BB	BB	AA	AA	BB	BB	BB	BB	AA	BB	BB	AA	BB	AA	BB	BB	AA	BB	BB	AA	BB	BB	AA	BB	AA	BB	BB	BB	AA	AA	AA	BB	AA	BB	BB	AA	AA	BB	BB	AA	BB	AA	BB	BB	AA
IWA3205	wsnp_Ex_c28973_38050756	[T/C]	AA	BB	BB	BB	AA	AA	BB	BB	BB	BB	AA	BB	BB	AA	BB	AA	BB	BB	AA	BB	BB	AA	BB	BB	AA	BB	AA	BB	BB	BB	AA	AA	AA	BB	AA	BB	BB	AA	AA	BB	BB	AA	BB	AA	BB	BB	AA
IWA3313	wsnp_Ex_c31017_39858962	[T/C]	AA	BB	BB	BB	AA	BB	AA	AA	BB	-	AA	AA	AA	AA	BB	BB	BB	AA	AA	AA	BB	AA	AA	AA	BB	BB	AA	BB	AA	BB	AA	BB	BB	BB	AA	AA	-	BB	-	BB	AA	AA	BB	BB	BB	AA	BB
IWA3391	wsnp_Ex_c32414_41076471	[T/C]	AA	BB	BB	BB	BB	AA	BB	BB	AA	BB	BB	BB	BB	AA	AA	BB	AA	BB	AA	BB	BB	AA	AA	BB	BB	BB	BB	BB	AA	BB	AA	BB	AA	BB	BB	AA	BB	BB	AA	BB	AA	AA	AA	BB	AA	BB	AA
IWA3400	wsnp_Ex_c32540_41180493	[T/G]	AA	BB	AA	AA	BB	AA	AA	BB	AA	AA	BB	AA	BB	BB	AA	BB	AA	BB	AA	AA	BB	AA	AA	AA	BB	BB	BB	AA	AA	BB	BB	BB	BB	BB	BB	AA	AA	AA	AA	AA	BB	BB	AA	AA	AA	BB	BB
IWA3449	wsnp_Ex_c33778_42210283	[A/G]	AA	BB	BB	BB	AA	BB	BB	BB	BB	AA	AA	BB	AA	BB	AA	AA	BB	AA	AA	AA	AA	BB	BB	AA	BB	AA	BB	BB	BB	BB	AA	AA	BB	BB	-	BB	BB	BB	BB	BB	BB	AA	BB	BB	BB	AA	BB
IWA3493	wsnp_Ex_c34714_42977595	[A/G]	AA	BB	BB	AA	AA	BB	AA	BB	AA	BB	AA	AA	AA	AA	AA	AA	AA	AA	BB	AA	AA	BB	AA	AA	BB	BB	AA	AA	AA	AA	AA	BB	BB	AA	AA	BB	AA	AA	BB	AA	BB	AA	BB	BB	AA	AA	AA
IWA3497	wsnp_Ex_c34765_43024979	[T/C]	AA	BB	BB	AA	BB	AA	-	BB	BB	BB	BB	AA	AA	AA	AA	AA	AA	AA	AA	AA	BB	BB	BB	-	AA	BB	BB	-	AA	-	BB	BB	-	BB	AA	BB	AA	BB	AA	AA	BB	AA	AA	BB	BB	AA	BB
IWA3508	wsnp_Ex_c3501_6408181	[A/G]	AA	BB	BB	BB	BB	AA	AA	BB	AA	AA	AA	AA	AA	AA	BB	-	AA	AA	AA	AA	AA	BB	BB	BB	AA	BB	BB	AA	BB	AA	BB	AA	BB	AA	BB	AA	BB	AA	BB	BB	BB	BB	AA	BB	BB	BB	BB
IWA3546	wsnp_Ex_c35861_43928486	[T/C]	AA	BB	BB	AA	BB	BB	AA	BB	BB	BB	BB	BB	BB	AA	BB	BB	-	AA	BB	-	AA	-	AA	AA	AA	BB	AA	BB	AA	BB	AA	BB	AA	BB	AA	AA	AA	AA	BB	AA	AA	BB	AA	BB	BB	BB	-
IWA3676	wsnp_Ex_c39304_46634878	[A/C]	AA	BB	BB	BB	BB	BB	AA	AA	BB	BB	BB	AA	BB	BB	BB	BB	BB	AA	BB	AA	BB	BB	BB	BB	BB	AA	BB	BB	BB	BB	BB	AA	BB	BB	BB	BB	AA	BB	BB	BB	AA	BB	AA	BB	AA	BB	BB
IWA3720	wsnp_Ex_c4051_7322799	[A/G]	AA	BB	BB	AA	AA	-	BB	BB	AA	AA	-	-	AA	BB	AA	AA	AA	BB	BB	BB	-	-	AA	AA	AA	BB	BB	AA	BB	BB	AA	BB	BB	BB	BB	BB	AA	AA	AA	-	BB	AA	AA	AA	AA	BB	AA
IWA3745	wsnp_Ex_c410_808465	[A/G]	AA	BB	BB	BB	AA	BB	BB	BB	BB	AA	AA	BB	AA	BB	AA	AA	BB	AA	AA	AA	AA	BB	BB	AA	BB	-	BB	BB	BB	BB	AA	AA	BB	BB	BB	BB	BB	BB	BB	BB	-	AA	BB	BB	BB	AA	BB
IWA3748	wsnp_Ex_c410_809769	[A/G]	AA	BB	BB	BB	AA	BB	BB	BB	BB	AA	AA	BB	AA	BB	AA	AA	BB	AA	AA	AA	AA	BB	BB	AA	BB	BB	BB	BB	BB	BB	AA	AA	BB	BB	BB	BB	BB	BB	BB	BB	BB	AA	BB	BB	BB	AA	BB
IWA3792	wsnp_Ex_c4166_7525617	[A/G]	AA	BB	BB	AA	BB	BB	AA	BB	BB	BB	BB	AA	BB	AA	-	AA	BB	AA	AA	BB	BB	BB	AA	AA	AA	AA	AA	AA	AA	AA	AA	BB	BB	AA	AA	BB	AA	BB	BB	AA	BB	AA	BB	AA	BB	BB	BB
IWA3846	wsnp_Ex_c42895_49355806	[A/G]	AA	BB	AA	AA	BB	AA	AA	BB	-	-	BB	AA	BB	BB	AA	BB	-	BB	AA	-	BB	AA	-	BB	BB	BB	BB	AA	AA	BB	BB	BB	BB	BB	BB	-	AA	AA	AA	AA	BB	BB	AA	-	AA	BB	BB
IWA3848	wsnp_Ex_c42970_49408553	[T/C]	AA	BB	BB	AA	AA	BB	AA	AA	BB	AA	AA	BB	-	AA	BB	AA	AA	AA	AA	BB	-	-	BB	AA	AA	AA	AA	AA	AA	-	-	BB	AA	BB	AA	AA	AA	AA	-	BB	BB	-	AA	-	AA	BB	BB
IWA3855	wsnp_Ex_c431_848217	[A/G]	AA	BB	BB	BB	AA	AA	AA	AA	BB	-	AA	AA	AA	-	AA	AA	-	AA	AA	AA	BB	BB	AA	AA	BB	BB	AA	AA	AA	BB	-	BB	AA	AA	AA	AA	BB	-	AA	-	BB	AA	AA	AA	BB	BB	AA
IWA3940	wsnp_Ex_c45487_51267140	[T/C]	AA	BB	AA	AA	AA	AA	AA	AA	BB	BB	AA	BB	BB	BB	AA	AA	AA	BB	AA	BB	BB	BB	BB	BB	AA	AA	AA	BB	AA	AA	AA	-	BB	AA	BB	AA	AA	BB	BB	AA	BB	AA	AA	BB	BB	BB	BB
IWA3955	wsnp_Ex_c4605_8239915	[A/G]	AA	BB	BB	AA	AA	BB	BB	BB	AA	AA	BB	-	BB	AA	AA	AA	AA	BB	BB	BB	BB	-	AA	AA	AA	BB	BB	AA	BB	BB	AA	AA	BB	BB	BB	BB	BB	AA	BB	BB	BB	AA	-	BB	AA	BB	AA
IWA3962	wsnp_Ex_c4612_8254533	[A/G]	AA	BB	BB	AA	AA	BB	AA	BB	BB	AA	AA	AA	AA	AA	BB	BB	AA	BB	BB	BB	BB	AA	BB	BB	AA	-	AA	AA	BB	BB	BB	BB	BB	BB	AA	BB	AA	AA	AA	AA	BB	AA	BB	BB	BB	AA	BB
IWA3972	wsnp_Ex_c46494_51987109	[A/G]	AA	BB	BB	BB	AA	BB	BB	AA	AA	AA	BB	BB	AA	BB	AA	BB	AA	BB	AA	BB	BB	AA	BB	BB	-	AA	AA	AA	AA	AA	BB	BB	AA	AA	AA	BB	AA	AA	AA	BB	BB	BB	BB	BB	AA	BB	AA
IWA3975	wsnp_Ex_c4666_8349206	[A/G]	AA	BB	BB	AA	BB	BB	BB	-	BB	-	AA	AA	AA	BB	AA	BB	BB	BB	AA	AA	BB	AA	AA	AA	AA	AA	AA	BB	AA	BB	AA	BB	AA	AA	AA	AA	BB	BB	-	BB	AA	AA	AA	BB	AA	AA	BB
IWA3987	wsnp_Ex_c47153_52447553	[T/C]	AA	BB	AA	-	AA	AA	BB	BB	AA	BB	BB	AA	BB	AA	BB	-	AA	BB	AA	BB	AA	AA	BB	AA	BB	BB	BB	BB	AA	AA	-	BB	BB	AA	BB	AA	BB	AA	BB	BB	BB	AA	AA	BB	AA	BB	BB
IWA4160	wsnp_Ex_c53019_56399917	[A/G]	AA	BB	AA	BB	AA	AA	BB	BB	AA	BB	BB	AA	BB	AA	BB	-	BB	BB	AA	BB	AA	BB	BB	AA	BB	BB	BB	BB	AA	AA	BB	AA	BB	BB	AA	AA	BB	AA	BB	AA	BB	BB	BB	BB	AA	AA	BB
IWA4170	wsnp_Ex_c5334_9427824	[A/G]	AA	BB	BB	BB	BB	BB	AA	BB	BB	BB	BB	BB	BB	BB	BB	BB	BB	AA	BB	BB	BB	BB	BB	BB	BB	BB	BB	BB	BB	BB	BB	BB	BB	BB	BB	BB	AA	BB	BB	BB	AA	BB	BB	BB	BB	BB	BB
IWA4245	wsnp_Ex_c54772_57527555	[T/C]	AA	BB	BB	BB	BB	AA	BB	BB	BB	BB	BB	AA	AA	AA	BB	BB	AA	AA	BB	AA	BB	BB	BB	BB	AA	AA	BB	BB	BB	AA	BB	AA	AA	BB	AA	BB	BB	AA	BB	AA	BB	AA	AA	AA	AA	BB	BB
IWA4259	wsnp_Ex_c55096_57733894	[A/G]	AA	BB	BB	AA	AA	BB	AA	BB	AA	BB	AA	AA	AA	AA	AA	AA	AA	AA	BB	AA	AA	BB	BB	AA	BB	BB	AA	AA	AA	AA	AA	BB	BB	AA	AA	BB	AA	AA	BB	AA	BB	AA	BB	BB	AA	AA	AA
IWA4291	wsnp_Ex_c56097_58351893	[A/C]	AA	BB	BB	AA	AA	BB	BB	BB	AA	AA	-	AA	AA	AA	AA	AA	AA	BB	BB	BB	BB	AA	AA	AA	AA	BB	BB	AA	BB	BB	AA	BB	BB	BB	BB	BB	AA	AA	AA	-	BB	AA	AA	AA	AA	BB	AA
IWA4330	wsnp_Ex_c57212_59019379	[T/C]	AA	BB	AA	AA	BB	AA	AA	BB	BB	BB	BB	AA	BB	BB	AA	BB	BB	BB	AA	BB	BB	AA	BB	BB	BB	BB	BB	AA	AA	BB	BB	BB	BB	BB	BB	BB	AA	AA	AA	AA	BB	BB	AA	BB	AA	BB	BB
IWA4420	wsnp_Ex_c6099_10674406	[A/G]	AA	BB	AA	AA	BB	BB	BB	BB	BB	BB	AA	BB	BB	AA	-	AA	-	AA	AA	BB	BB	BB	BB	BB	AA	BB	BB	BB	AA	AA	BB	AA	AA	AA	BB	AA	BB	BB	BB	BB	AA	AA	AA	AA	BB	BB	AA
IWA4432	wsnp_Ex_c6139_10740143	[A/G]	AA	BB	BB	AA	BB	BB	AA	BB	BB	-	BB	AA	BB	AA	BB	AA	BB	BB	AA	BB	BB	BB	AA	AA	AA	AA	AA	AA	AA	AA	AA	BB	BB	AA	AA	-	AA	BB	AA	AA	BB	AA	AA	AA	BB	BB	BB
IWA4445	wsnp_Ex_c6209_10838456	[A/G]	AA	BB	AA	AA	BB	AA	AA	AA	AA	AA	BB	AA	AA	BB	AA	AA	BB	BB	BB	AA	BB	BB	BB	AA	BB	BB	BB	-	AA	AA	AA	BB	AA	BB	AA	BB	AA	AA	AA	AA	AA	BB	BB	BB	AA	AA	BB
IWA4593	wsnp_Ex_c6961_11997446	[T/G]	AA	BB	AA	BB	BB	AA	AA	AA	AA	BB	BB	AA	BB	BB	AA	AA	AA	AA	AA	BB	AA	BB	BB	BB	BB	BB	AA	BB	BB	-	AA	AA	AA	AA	AA	AA	BB	AA	BB	BB	BB	BB	BB	BB	BB	AA	AA
IWA4594	wsnp_Ex_c6961_11998812	[A/C]	AA	BB	BB	BB	AA	BB	BB	BB	BB	AA	AA	BB	BB	AA	AA	AA	BB	-	AA	AA	BB	BB	BB	AA	AA	BB	BB	BB	BB	BB	BB	AA	AA	AA	AA	BB	AA	BB	AA	BB	AA	AA	BB	AA	BB	AA	BB
IWA4615	wsnp_Ex_c7059_12151409	[A/G]	AA	BB	BB	AA	BB	AA	AA	AA	AA	AA	BB	BB	BB	AA	AA	AA	AA	-	AA	AA	BB	AA	AA	BB	AA	AA	BB	AA	AA	AA	AA	AA	AA	BB	BB	AA	AA	BB	AA	BB	AA	AA	AA	BB	AA	BB	AA
IWA4686	wsnp_Ex_c7483_12800686	[T/C]	AA	BB	BB	-	-	AA	BB	BB	BB	-	BB	AA	AA	AA	AA	BB	BB	BB	BB	BB	AA	AA	BB	BB	AA	BB	AA	AA	AA	BB	BB	AA	AA	AA	AA	BB	AA	BB	BB	BB	BB	AA	BB	AA	AA	BB	BB
IWA4771	wsnp_Ex_c8131_13753986	[T/G]	AA	BB	BB	AA	BB	BB	AA	BB	BB	BB	BB	AA	-	AA	-	AA	BB	AA	AA	BB	BB	BB	AA	AA	AA	AA	AA	AA	AA	AA	AA	BB	BB	AA	AA	-	AA	BB	BB	AA	BB	AA	BB	AA	-	BB	BB
IWA5011	wsnp_Ex_rep_c101414_86781128	[T/C]	AA	BB	BB	AA	AA	BB	BB	BB	AA	AA	-	AA	-	AA	AA	AA	AA	BB	BB	BB	BB	AA	AA	AA	AA	BB	BB	AA	BB	BB	AA	AA	BB	BB	BB	BB	BB	AA	BB	BB	BB	AA	AA	BB	AA	BB	AA
IWA5024	wsnp_Ex_rep_c101581_86924089	[T/G]	AA	BB	BB	AA	BB	AA	-	AA	AA	BB	AA	BB	AA	AA	AA	AA	AA	AA	AA	AA	AA	BB	BB	-	AA	BB	AA	AA	AA	AA	BB	AA	AA	AA	BB	AA	BB	BB	AA	BB	BB	BB	BB	AA	BB	AA	AA
IWA5058	wsnp_Ex_rep_c102186_87408828	[A/G]	AA	BB	BB	BB	BB	BB	AA	AA	BB	AA	AA	AA	BB	BB	BB	AA	BB	AA	BB	BB	BB	AA	BB	BB	BB	AA	BB	BB	BB	-	AA	AA	BB	BB	BB	BB	BB	AA	AA	AA	BB	AA	AA	BB	AA	AA	BB
IWA5087	wsnp_Ex_rep_c103167_88181968	[A/G]	AA	BB	-	AA	BB	BB	BB	BB	BB	BB	AA	BB	BB	AA	AA	AA	BB	AA	AA	BB	BB	BB	BB	BB	AA	BB	BB	BB	BB	AA	BB	AA	AA	AA	BB	AA	BB	BB	BB	BB	BB	AA	-	AA	BB	BB	AA
IWA5330	wsnp_Ex_rep_c66900_65314631	[T/C]	AA	BB	BB	BB	BB	BB	AA	AA	BB	-	AA	AA	AA	AA	AA	BB	BB	BB	AA	AA	BB	AA	AA	AA	BB	AA	AA	BB	AA	BB	AA	BB	BB	BB	AA	AA	BB	BB	-	BB	AA	AA	BB	BB	BB	AA	BB
IWA5334	wsnp_Ex_rep_c66921_65344887	[A/G]	AA	BB	-	AA	BB	AA	BB	BB	BB	-	BB	AA	AA	AA	AA	BB	BB	BB	BB	BB	AA	AA	BB	BB	AA	BB	AA	AA	AA	BB	BB	AA	AA	AA	AA	BB	AA	BB	BB	BB	BB	AA	BB	AA	AA	BB	-
IWA5363	wsnp_Ex_rep_c67145_65628860	[A/G]	AA	BB	BB	AA	BB	BB	AA	AA	BB	BB	BB	AA	-	AA	AA	AA	BB	AA	BB	-	BB	BB	AA	BB	AA	AA	AA	AA	AA	AA	BB	BB	BB	AA	AA	AA	BB	BB	BB	BB	BB	AA	-	AA	BB	BB	BB
IWA5389	wsnp_Ex_rep_c67369_65940505	[A/G]	AA	BB	BB	-	BB	AA	AA	BB	AA	AA	AA	AA	AA	AA	BB	AA	AA	AA	AA	AA	AA	BB	BB	BB	AA	BB	BB	AA	BB	AA	BB	AA	BB	AA	BB	AA	BB	AA	BB	BB	BB	BB	AA	BB	BB	BB	BB
IWA5396	wsnp_Ex_rep_c67404_65986980	[T/C]	AA	BB	BB	BB	BB	BB	BB	-	BB	-	BB	AA	-	BB	BB	-	AA	-	BB	AA	BB	BB	BB	AA	AA	AA	BB	BB	BB	AA	AA	BB	AA	BB	BB	AA	BB	AA	AA	BB	BB	BB	BB	BB	AA	BB	AA
IWA5413	wsnp_Ex_rep_c67561_66188180	[A/G]	AA	BB	BB	AA	BB	AA	AA	AA	AA	AA	AA	BB	BB	AA	BB	AA	BB	AA	BB	AA	-	BB	AA	AA	AA	AA	AA	BB	AA	AA	-	BB	AA	AA	BB	AA	BB	BB	AA	AA	BB	AA	AA	AA	AA	BB	BB
IWA5416	wsnp_Ex_rep_c67563_66193104	[T/C]	AA	BB	BB	BB	AA	AA	AA	AA	BB	AA	AA	AA	AA	-	AA	AA	-	AA	AA	AA	BB	BB	AA	AA	BB	BB	AA	AA	AA	BB	-	BB	AA	AA	AA	AA	BB	-	AA	-	BB	AA	AA	AA	BB	BB	AA
IWA5544	wsnp_Ex_rep_c68569_67411985	[T/C]	AA	BB	BB	AA	BB	BB	AA	BB	BB	-	BB	AA	-	AA	AA	AA	BB	BB	AA	-	-	BB	AA	AA	AA	AA	AA	AA	AA	AA	AA	BB	BB	AA	AA	AA	AA	BB	BB	AA	BB	AA	AA	AA	BB	BB	BB
IWA5584	wsnp_Ex_rep_c69123_68034403	[T/C]	AA	BB	BB	AA	AA	BB	BB	AA	BB	AA	BB	AA	AA	BB	AA	AA	BB	BB	AA	AA	BB	BB	AA	AA	AA	BB	AA	BB	AA	AA	BB	AA	BB	AA	AA	AA	-	BB	BB	AA	BB	BB	AA	BB	BB	BB	AA
IWA5658	wsnp_Ex_rep_c69928_68889412	[T/C]	AA	BB	BB	BB	BB	AA	BB	BB	AA	AA	BB	BB	BB	BB	-	AA	AA	BB	BB	BB	AA	BB	-	BB	AA	BB	BB	BB	BB	BB	-	BB	AA	AA	BB	AA	BB	BB	AA	BB	BB	AA	AA	AA	BB	BB	AA
IWA5739	wsnp_Ex_rep_c73742_71687509	[T/C]	AA	BB	AA	AA	BB	AA	BB	BB	AA	BB	AA	BB	BB	-	AA	AA	BB	BB	BB	BB	BB	BB	AA	AA	BB	BB	-	AA	BB	AA	BB	AA	BB	AA	AA	AA	BB	AA	AA	AA	AA	AA	AA	BB	BB	BB	AA
IWA5911	wsnp_JD_c20553_18260731	[T/C]	AA	BB	BB	AA	AA	BB	AA	BB	BB	AA	AA	BB	AA	AA	BB	BB	AA	BB	BB	AA	BB	AA	BB	BB	AA	BB	BB	AA	BB	BB	BB	AA	BB	BB	AA	BB	-	BB	AA	AA	BB	AA	BB	BB	AA	AA	AA
IWA6111	wsnp_JD_c5795_6955031	[A/G]	AA	BB	BB	AA	AA	AA	BB	BB	BB	BB	AA	BB	AA	BB	AA	BB	BB	BB	AA	BB	AA	BB	AA	AA	AA	AA	AA	AA	AA	BB	BB	BB	AA	AA	-	BB	AA	BB	AA	AA	BB	AA	BB	BB	AA	BB	BB
IWA6160	wsnp_JD_c7060_8169490	[A/G]	AA	BB	BB	AA	BB	BB	BB	AA	BB	AA	BB	BB	AA	BB	AA	BB	AA	AA	BB	BB	AA	BB	AA	BB	BB	AA	AA	BB	BB	AA	AA	BB	BB	AA	AA	AA	BB	BB	AA	AA	BB	BB	AA	AA	BB	BB	BB
IWA6393	wsnp_Ku_c1045_2115866	[A/G]	AA	BB	BB	BB	AA	BB	BB	AA	AA	AA	BB	BB	AA	BB	AA	BB	AA	BB	AA	BB	BB	AA	BB	BB	AA	AA	AA	AA	AA	AA	BB	BB	AA	AA	AA	BB	AA	AA	AA	BB	BB	BB	BB	BB	AA	BB	AA
IWA6422	wsnp_Ku_c11466_18716865	[A/G]	AA	BB	-	BB	BB	BB	BB	-	BB	-	BB	AA	-	BB	BB	AA	AA	BB	-	AA	BB	BB	BB	AA	AA	AA	AA	BB	BB	AA	AA	BB	AA	BB	BB	AA	BB	AA	AA	BB	BB	BB	BB	BB	AA	AA	AA
IWA6447	wsnp_Ku_c11980_19464222	[A/G]	AA	BB	-	-	-	AA	BB	BB	BB	-	BB	AA	AA	AA	AA	BB	BB	BB	BB	BB	AA	AA	BB	BB	AA	BB	AA	AA	AA	BB	BB	AA	AA	AA	AA	BB	AA	BB	BB	BB	BB	AA	BB	AA	AA	BB	BB
IWA6459	wsnp_Ku_c12464_20125626	[T/C]	AA	BB	BB	BB	BB	AA	BB	AA	BB	BB	AA	BB	AA	BB	AA	BB	BB	BB	BB	BB	BB	BB	AA	AA	AA	AA	AA	AA	AA	AA	BB	BB	AA	AA	-	AA	AA	AA	AA	AA	BB	BB	BB	AA	AA	BB	BB
IWA6489	wsnp_Ku_c13229_21142792	[T/C]	AA	BB	BB	AA	AA	AA	-	AA	BB	AA	AA	AA	AA	BB	AA	BB	BB	BB	BB	AA	AA	AA	BB	AA	AA	BB	BB	AA	-	BB	AA	BB	AA	BB	BB	AA	AA	AA	AA	AA	AA	BB	AA	BB	AA	BB	BB
IWA6526	wsnp_Ku_c14332_22613741	[A/G]	AA	BB	BB	-	BB	AA	BB	BB	-	-	BB	AA	AA	AA	AA	BB	BB	BB	BB	BB	AA	AA	BB	BB	AA	BB	AA	AA	AA	BB	BB	AA	AA	AA	AA	BB	AA	BB	BB	BB	BB	AA	BB	AA	AA	BB	BB
IWA6567	wsnp_Ku_c15630_24304828	[A/G]	AA	BB	-	-	-	AA	BB	BB	BB	-	BB	AA	AA	AA	AA	BB	BB	BB	BB	BB	AA	AA	BB	BB	AA	BB	AA	AA	AA	BB	BB	AA	AA	AA	AA	BB	AA	BB	-	BB	BB	AA	BB	AA	AA	BB	-
IWA6573	wsnp_Ku_c15816_24541162	[T/C]	AA	BB	BB	BB	AA	BB	AA	AA	AA	AA	AA	AA	AA	AA	BB	BB	AA	AA	AA	BB	BB	AA	AA	AA	BB	BB	AA	BB	AA	AA	AA	BB	BB	BB	AA	AA	-	BB	BB	BB	-	BB	BB	BB	BB	AA	BB
IWA6582	wsnp_Ku_c1615_3178276	[A/C]	AA	BB	-	AA	AA	AA	-	AA	-	AA	AA	AA	AA	BB	AA	BB	BB	BB	BB	AA	AA	AA	BB	AA	AA	BB	BB	AA	-	BB	AA	BB	AA	BB	BB	AA	AA	AA	AA	AA	AA	BB	AA	BB	AA	BB	BB
IWA6633	wsnp_Ku_c17718_26860963	[A/G]	AA	BB	-	BB	BB	BB	BB	-	BB	-	BB	AA	-	BB	BB	-	AA	BB	BB	AA	BB	BB	BB	AA	AA	AA	AA	BB	BB	AA	AA	BB	AA	BB	BB	AA	BB	AA	AA	BB	BB	BB	BB	BB	AA	AA	AA
IWA6641	wsnp_Ku_c18023_27232712	[T/G]	AA	BB	BB	BB	BB	AA	BB	BB	AA	BB	BB	BB	BB	BB	AA	BB	AA	BB	AA	BB	BB	AA	AA	BB	BB	AA	BB	BB	AA	BB	AA	BB	AA	BB	BB	AA	BB	BB	AA	BB	AA	AA	AA	BB	AA	BB	AA
IWA6649	wsnp_Ku_c183_358844	[T/C]	AA	BB	BB	BB	AA	AA	AA	AA	AA	AA	BB	BB	BB	AA	AA	BB	-	AA	AA	BB	AA	BB	BB	AA	BB	AA	BB	AA	AA	BB	BB	AA	AA	BB	BB	AA	BB	BB	BB	BB	BB	AA	AA	AA	AA	AA	AA
IWA6774	wsnp_Ku_c25372_35336531	[T/C]	AA	BB	BB	BB	AA	BB	BB	BB	BB	AA	AA	BB	AA	BB	AA	AA	BB	AA	AA	AA	AA	BB	BB	AA	BB	-	BB	BB	BB	BB	AA	AA	BB	BB	-	BB	BB	BB	BB	BB	BB	AA	BB	BB	BB	AA	BB
IWA6833	wsnp_Ku_c28104_38042857	[T/C]	AA	BB	BB	BB	AA	BB	BB	BB	BB	AA	AA	BB	BB	AA	AA	AA	BB	-	BB	AA	BB	BB	BB	AA	AA	BB	BB	BB	BB	-	AA	AA	AA	AA	AA	BB	AA	BB	AA	BB	AA	AA	BB	AA	BB	AA	BB
IWA6847	wsnp_Ku_c28591_38511783	[T/G]	AA	BB	AA	AA	AA	AA	BB	AA	BB	AA	AA	AA	AA	BB	BB	AA	BB	BB	BB	AA	AA	BB	BB	AA	AA	BB	BB	BB	AA	AA	AA	BB	AA	BB	BB	AA	AA	BB	BB	AA	AA	AA	AA	BB	AA	AA	BB
IWA6994	wsnp_Ku_c38713_47298856	[A/G]	AA	BB	BB	BB	AA	BB	BB	AA	AA	AA	BB	AA	AA	BB	AA	AA	BB	BB	BB	BB	BB	BB	BB	BB	-	BB	AA	AA	AA	AA	BB	AA	AA	BB	AA	BB	BB	AA	AA	AA	AA	AA	BB	BB	AA	BB	AA
IWA7158	wsnp_Ku_c5359_9531713	[A/G]	AA	BB	BB	-	AA	BB	AA	-	AA	-	-	BB	AA	AA	AA	-	BB	-	BB	-	AA	BB	BB	AA	BB	BB	-	AA	AA	AA	AA	BB	BB	-	-	AA	AA	AA	AA	-	BB	-	-	-	AA	AA	-
IWA7159	wsnp_Ku_c5378_9559013	[A/G]	AA	BB	BB	AA	BB	BB	AA	BB	BB	AA	BB	BB	BB	AA	BB	BB	AA	AA	AA	AA	AA	AA	AA	BB	AA	BB	AA	BB	AA	AA	BB	BB	AA	BB	BB	AA	BB	BB	BB	AA	AA	BB	AA	AA	BB	BB	BB
IWA7214	wsnp_Ku_c6158_10825959	[T/G]	AA	BB	AA	AA	BB	AA	AA	AA	-	AA	AA	AA	AA	BB	BB	AA	BB	BB	BB	AA	AA	BB	-	BB	AA	BB	BB	BB	BB	AA	AA	BB	AA	BB	BB	AA	AA	BB	BB	AA	AA	BB	AA	BB	AA	AA	BB
IWA7232	wsnp_Ku_c665_1371121	[T/C]	AA	BB	BB	-	BB	AA	AA	BB	AA	AA	AA	AA	AA	AA	BB	AA	AA	AA	AA	AA	AA	BB	BB	BB	AA	BB	BB	AA	BB	AA	BB	AA	BB	AA	BB	AA	BB	AA	BB	BB	BB	BB	AA	BB	BB	BB	BB
IWA7398	wsnp_Ku_rep_c103074_89904851	[T/C]	AA	BB	BB	AA	AA	AA	BB	AA	BB	AA	AA	AA	AA	BB	AA	BB	BB	BB	BB	AA	AA	AA	BB	AA	AA	BB	BB	AA	-	BB	AA	BB	AA	BB	BB	AA	AA	AA	AA	AA	AA	BB	AA	BB	AA	BB	BB
IWA7431	wsnp_Ku_rep_c112734_95776957	[T/C]	AA	BB	AA	AA	BB	AA	-	AA	AA	BB	AA	AA	AA	AA	AA	BB	AA	-	AA	AA	BB	AA	BB	AA	BB	AA	BB	AA	BB	BB	-	AA	BB	AA	BB	AA	-	AA	BB	AA	AA	AA	AA	AA	BB	AA	BB
IWA7455	wsnp_Ku_rep_c69533_68919669	[T/C]	AA	BB	BB	AA	BB	BB	BB	AA	AA	AA	BB	BB	AA	BB	AA	BB	AA	AA	BB	BB	AA	BB	AA	BB	BB	AA	AA	BB	BB	AA	AA	BB	BB	AA	AA	AA	BB	BB	AA	AA	AA	BB	AA	AA	BB	AA	BB
IWA7598	wsnp_Ra_c13_24911	[A/G]	AA	BB	BB	AA	BB	BB	BB	BB	BB	-	AA	AA	AA	BB	AA	BB	BB	BB	AA	AA	BB	AA	AA	AA	-	AA	AA	BB	AA	BB	AA	BB	AA	AA	AA	AA	BB	BB	BB	BB	AA	AA	AA	BB	AA	AA	BB
IWA7617	wsnp_Ra_c13906_21872355	[T/G]	AA	BB	BB	AA	BB	BB	AA	BB	BB	BB	BB	AA	-	AA	-	AA	BB	AA	AA	-	BB	BB	AA	AA	AA	AA	AA	AA	AA	AA	AA	BB	BB	AA	AA	-	AA	BB	BB	AA	BB	AA	-	AA	-	BB	BB
IWA7641	wsnp_Ra_c15715_24192817	[T/C]	AA	BB	AA	AA	BB	BB	AA	BB	-	AA	BB	AA	BB	BB	AA	BB	BB	BB	AA	-	BB	AA	-	AA	BB	BB	BB	AA	AA	BB	BB	BB	AA	BB	BB	-	AA	AA	AA	BB	BB	BB	AA	-	AA	BB	BB
IWA7654	wsnp_Ra_c1654_3265291	[A/G]	AA	BB	-	-	BB	AA	AA	BB	AA	AA	AA	AA	AA	AA	BB	AA	AA	AA	AA	AA	AA	BB	BB	BB	AA	BB	BB	AA	BB	AA	BB	AA	BB	AA	BB	AA	BB	AA	BB	BB	BB	BB	AA	BB	BB	BB	BB
IWA7671	wsnp_Ra_c17622_26522072	[A/G]	AA	BB	BB	AA	AA	BB	-	AA	BB	AA	AA	BB	AA	AA	BB	BB	AA	AA	AA	BB	AA	BB	BB	AA	AA	AA	AA	AA	AA	AA	BB	BB	AA	BB	AA	AA	AA	AA	BB	BB	BB	BB	AA	BB	AA	BB	BB
IWA7707	wsnp_Ra_c19637_28840370	[A/G]	AA	BB	BB	AA	AA	BB	AA	BB	BB	BB	BB	BB	BB	AA	BB	BB	AA	BB	BB	BB	BB	AA	BB	BB	AA	AA	AA	BB	BB	AA	BB	AA	BB	BB	BB	BB	BB	BB	AA	BB	BB	BB	BB	BB	BB	-	AA
IWA7745	wsnp_Ra_c21364_30746475	[A/G]	AA	BB	AA	BB	BB	BB	BB	-	BB	BB	BB	BB	BB	BB	BB	AA	BB	BB	AA	AA	BB	-	BB	AA	BB	AA	AA	BB	BB	BB	AA	BB	AA	BB	BB	AA	BB	BB	AA	BB	BB	BB	BB	BB	AA	AA	AA
IWA7850	wsnp_Ra_c31353_40494768	[T/C]	AA	BB	BB	AA	BB	AA	AA	AA	AA	AA	AA	BB	BB	AA	BB	AA	AA	AA	AA	AA	-	BB	AA	AA	AA	AA	AA	BB	AA	AA	BB	BB	AA	AA	BB	AA	BB	BB	AA	AA	BB	AA	AA	AA	AA	BB	BB
IWA7859	wsnp_Ra_c31915_40982091	[A/G]	AA	BB	BB	AA	BB	BB	AA	BB	BB	BB	BB	AA	-	AA	-	AA	BB	AA	AA	-	BB	BB	AA	AA	AA	AA	AA	AA	AA	AA	AA	BB	BB	AA	AA	-	AA	BB	BB	AA	BB	AA	-	AA	-	BB	BB
IWA7947	wsnp_Ra_c4503_8155485	[A/C]	AA	BB	AA	AA	BB	AA	BB	AA	BB	AA	AA	AA	AA	AA	-	BB	AA	BB	AA	BB	BB	AA	BB	BB	AA	BB	BB	BB	AA	BB	AA	AA	BB	BB	BB	AA	AA	BB	AA	BB	BB	-	AA	BB	BB	AA	AA
IWA7992	wsnp_Ra_c53181_56932563	[A/G]	AA	BB	AA	AA	AA	BB	BB	BB	BB	BB	BB	AA	AA	BB	AA	AA	-	AA	BB	AA	BB	BB	BB	-	AA	BB	-	-	AA	BB	AA	BB	AA	AA	BB	BB	AA	BB	AA	AA	AA	AA	BB	BB	BB	AA	BB
IWA8001	wsnp_Ra_c5485_9703900	[T/C]	AA	BB	BB	AA	AA	AA	-	AA	BB	AA	AA	AA	AA	BB	AA	BB	BB	BB	BB	AA	AA	AA	BB	AA	AA	BB	BB	AA	-	BB	AA	BB	AA	BB	BB	AA	AA	AA	AA	AA	AA	BB	AA	BB	AA	BB	BB
IWA8026	wsnp_Ra_c6182_10833256	[A/G]	AA	BB	BB	AA	AA	BB	BB	BB	AA	AA	-	-	-	AA	AA	AA	AA	BB	BB	BB	BB	-	AA	AA	AA	BB	BB	AA	BB	BB	AA	AA	BB	BB	BB	BB	BB	-	BB	BB	BB	AA	-	BB	AA	BB	AA
IWA8097	wsnp_Ra_c9155_15344108	[T/C]	AA	BB	BB	BB	BB	AA	BB	AA	BB	BB	AA	BB	AA	BB	AA	BB	BB	BB	BB	BB	BB	BB	AA	-	AA	AA	AA	-	AA	AA	BB	BB	AA	AA	-	AA	AA	AA	AA	AA	BB	BB	BB	AA	AA	BB	BB
IWA8107	wsnp_Ra_c9755_16199734	[T/C]	AA	BB	AA	AA	BB	AA	BB	BB	AA	BB	-	BB	BB	AA	AA	AA	BB	BB	BB	BB	BB	BB	AA	-	BB	BB	-	AA	BB	AA	BB	AA	BB	-	-	AA	-	AA	AA	AA	BB	BB	AA	BB	BB	BB	AA
IWA8233	wsnp_RFL_Contig1210_295012	[T/C]	AA	BB	BB	-	BB	AA	BB	BB	AA	AA	BB	AA	BB	AA	BB	-	AA	BB	AA	BB	AA	BB	BB	BB	BB	BB	BB	AA	AA	AA	BB	AA	BB	BB	BB	AA	BB	AA	BB	BB	BB	AA	AA	BB	BB	BB	BB
IWA8332	wsnp_RFL_Contig2403_1927045	[A/G]	AA	BB	AA	-	AA	BB	BB	BB	BB	BB	BB	AA	AA	BB	AA	AA	-	AA	BB	AA	BB	BB	BB	-	AA	BB	-	-	AA	BB	AA	BB	AA	AA	BB	BB	AA	BB	AA	AA	AA	AA	BB	BB	BB	AA	BB
IWA8334	wsnp_RFL_Contig2409_1937215	[A/G]	AA	BB	BB	AA	AA	BB	AA	BB	BB	AA	AA	AA	AA	AA	BB	BB	AA	BB	BB	BB	BB	AA	BB	BB	AA	BB	-	AA	BB	BB	BB	BB	BB	BB	AA	BB	AA	AA	AA	AA	BB	AA	BB	BB	BB	AA	BB
IWA8477	wsnp_RFL_Contig3512_3672726	[A/G]	AA	BB	AA	BB	BB	AA	AA	BB	BB	AA	AA	AA	BB	BB	BB	AA	-	AA	BB	BB	BB	AA	BB	BB	AA	AA	BB	BB	BB	AA	AA	BB	BB	BB	AA	AA	BB	AA	AA	AA	AA	BB	AA	-	AA	AA	BB
IWA8523	wsnp_RFL_Contig3850_4199825	[A/G]	AA	BB	-	AA	AA	BB	AA	-	BB	AA	BB	BB	AA	BB	BB	BB	AA	BB	BB	BB	BB	AA	AA	BB	AA	AA	AA	BB	BB	-	BB	AA	BB	BB	AA	BB	BB	BB	AA	BB	BB	BB	AA	BB	BB	BB	BB
IWA8598	wsnp_RFL_Contig4475_5295587	[A/G]	AA	BB	BB	BB	AA	BB	BB	BB	BB	AA	AA	BB	AA	BB	AA	AA	BB	AA	AA	AA	AA	BB	BB	AA	BB	AA	BB	BB	BB	BB	AA	AA	BB	BB	-	BB	BB	BB	BB	BB	AA	AA	BB	BB	BB	AA	BB
IWA8622	wsnp_RFL_Contig4735_5673999	[T/G]	AA	BB	BB	BB	AA	AA	AA	AA	AA	AA	BB	BB	BB	AA	AA	BB	-	AA	-	BB	AA	BB	BB	-	BB	AA	BB	AA	AA	BB	BB	AA	AA	BB	BB	AA	BB	BB	BB	BB	BB	AA	AA	AA	AA	AA	AA
IWA98	wsnp_BE438866A_Ta_2_8	[A/G]	AA	BB	BB	BB	AA	BB	AA	AA	AA	AA	BB	BB	BB	AA	AA	AA	-	AA	-	BB	AA	-	AA	-	BB	AA	BB	AA	AA	BB	BB	AA	BB	BB	BB	BB	BB	BB	BB	BB	BB	AA	BB	AA	AA	AA	BB
IWA110	wsnp_BE442776A_Ta_2_2	[A/C]	AA	BB	BB	AA	BB	BB	AA	BB	BB	BB	BB	AA	-	AA	-	AA	BB	AA	AA	-	BB	BB	AA	AA	AA	AA	AA	AA	AA	AA	AA	BB	BB	AA	AA	-	AA	BB	BB	AA	BB	AA	BB	AA	-	BB	BB
IWA206	wsnp_BE488206B_Ta_2_1	[A/G]	AA	BB	BB	BB	BB	BB	AA	AA	BB	BB	BB	AA	BB	BB	BB	AA	BB	AA	BB	AA	BB	BB	BB	BB	BB	-	BB	BB	BB	BB	BB	AA	BB	BB	BB	BB	AA	-	AA	BB	AA	BB	AA	BB	AA	BB	BB
IWA307	wsnp_BE498419B_Ta_1_2	[T/C]	AA	BB	AA	AA	BB	BB	AA	BB	BB	BB	AA	AA	BB	BB	BB	BB	BB	AA	BB	-	BB	BB	BB	BB	BB	-	BB	BB	BB	AA	BB	BB	AA	AA	BB	BB	AA	AA	BB	AA	BB	AA	BB	BB	BB	AA	AA
IWA308	wsnp_BE498419B_Ta_1_3	[A/G]	AA	BB	AA	AA	BB	BB	AA	BB	BB	BB	AA	AA	BB	BB	BB	BB	BB	AA	BB	-	BB	BB	BB	BB	BB	AA	BB	BB	BB	AA	BB	BB	AA	AA	BB	BB	AA	AA	BB	AA	BB	AA	BB	BB	BB	AA	AA
IWA441	wsnp_BF291974A_Ta_2_1	[A/G]	AA	BB	BB	BB	AA	AA	BB	AA	BB	BB	AA	BB	BB	AA	-	AA	BB	BB	AA	BB	BB	AA	-	BB	AA	BB	AA	BB	AA	AA	AA	AA	AA	BB	AA	BB	BB	AA	AA	BB	BB	AA	BB	AA	-	BB	AA
IWA603	wsnp_BM138178A_Ta_2_1	[A/G]	AA	BB	BB	AA	BB	BB	AA	AA	BB	BB	BB	AA	BB	BB	AA	AA	BB	AA	BB	-	AA	BB	AA	BB	AA	AA	AA	AA	AA	AA	BB	BB	BB	AA	AA	AA	BB	BB	BB	BB	BB	AA	-	AA	BB	BB	BB
IWA679	wsnp_CAP11_c1591_881161	[A/G]	AA	BB	BB	AA	AA	BB	AA	BB	BB	AA	BB	BB	AA	BB	AA	AA	BB	BB	BB	AA	BB	AA	BB	AA	AA	BB	BB	AA	AA	AA	BB	AA	BB	BB	-	AA	BB	BB	AA	AA	AA	AA	BB	AA	BB	BB	AA
IWA683	wsnp_CAP11_c166_172556	[A/G]	AA	BB	AA	AA	BB	BB	AA	BB	BB	BB	AA	BB	BB	BB	BB	BB	BB	AA	BB	BB	BB	BB	BB	BB	BB	-	BB	BB	BB	BB	BB	-	BB	BB	BB	BB	AA	AA	BB	AA	AA	AA	BB	BB	BB	BB	BB
IWA746	wsnp_CAP11_c3226_1588070	[T/C]	AA	BB	BB	BB	BB	AA	AA	BB	AA	AA	BB	BB	BB	BB	AA	AA	AA	BB	AA	AA	AA	BB	BB	AA	AA	AA	BB	AA	BB	AA	BB	BB	AA	BB	-	AA	AA	BB	AA	BB	AA	BB	BB	AA	AA	AA	AA
IWA763	wsnp_CAP11_c3947_1867089	[T/G]	AA	BB	BB	BB	BB	BB	BB	BB	BB	AA	AA	BB	BB	AA	BB	AA	BB	AA	AA	BB	BB	BB	BB	BB	AA	BB	BB	BB	BB	BB	-	-	AA	AA	BB	AA	BB	BB	AA	BB	BB	AA	-	AA	BB	BB	AA
IWA851	wsnp_CAP11_rep_c4157_1965583	[T/C]	AA	BB	BB	AA	-	AA	AA	AA	-	AA	AA	AA	AA	AA	AA	AA	BB	AA	BB	BB	BB	-	BB	BB	BB	BB	-	BB	AA	AA	AA	AA	-	AA	AA	AA	BB	BB	BB	BB	BB	AA	AA	BB	BB	BB	BB
IWA933	wsnp_CAP12_c197_110707	[T/C]	AA	BB	BB	AA	BB	AA	AA	AA	AA	AA	AA	BB	BB	AA	BB	AA	AA	AA	AA	AA	-	BB	AA	AA	AA	AA	AA	BB	AA	AA	BB	BB	AA	AA	BB	AA	BB	BB	AA	AA	BB	AA	AA	AA	AA	BB	BB
IWA1251	wsnp_CD452643B_Ta_2_1	[A/G]	AA	BB	BB	BB	BB	BB	AA	BB	BB	BB	AA	BB	BB	BB	BB	BB	BB	AA	BB	BB	BB	BB	BB	BB	BB	-	BB	BB	BB	BB	BB	BB	BB	BB	BB	BB	AA	BB	BB	BB	AA	BB	BB	BB	BB	BB	BB
IWA1259	wsnp_CD454152B_Ta_2_1	[A/G]	AA	BB	-	BB	AA	BB	BB	AA	AA	AA	BB	BB	AA	BB	BB	BB	BB	BB	AA	-	BB	AA	AA	AA	AA	AA	AA	AA	AA	AA	BB	BB	AA	AA	AA	BB	AA	AA	AA	BB	BB	BB	BB	BB	AA	BB	AA
IWA1262	wsnp_CD454448A_Ta_2_1	[T/C]	AA	BB	AA	AA	BB	AA	BB	AA	AA	BB	AA	AA	AA	AA	AA	BB	AA	BB	AA	AA	BB	AA	BB	AA	BB	AA	BB	AA	BB	BB	BB	AA	BB	AA	BB	AA	AA	AA	BB	AA	AA	AA	AA	AA	BB	AA	BB
IWA1266	wsnp_CD897414B_Ta_2_1	[T/C]	AA	BB	BB	BB	BB	BB	BB	-	BB	-	BB	AA	-	BB	BB	AA	AA	AA	BB	AA	BB	BB	BB	AA	AA	AA	BB	BB	BB	AA	AA	BB	AA	BB	BB	AA	BB	AA	AA	BB	BB	BB	BB	BB	AA	BB	AA
IWA1493	wsnp_Ex_c1143_2195442	[A/C]	AA	BB	AA	BB	BB	AA	AA	BB	BB	AA	AA	AA	BB	BB	BB	AA	BB	AA	BB	BB	BB	AA	BB	BB	AA	AA	AA	BB	BB	AA	AA	BB	BB	BB	AA	AA	BB	AA	AA	AA	AA	BB	AA	BB	AA	AA	BB
IWA1722	wsnp_Ex_c13064_20670748	[A/C]	AA	BB	AA	-	BB	BB	AA	AA	AA	BB	BB	AA	BB	BB	BB	AA	AA	AA	AA	BB	AA	BB	BB	AA	BB	BB	AA	BB	AA	AA	AA	AA	AA	AA	BB	AA	BB	AA	BB	BB	AA	BB	BB	BB	AA	AA	AA
IWA2298	wsnp_Ex_c18318_27140346	[T/C]	AA	BB	AA	AA	BB	AA	BB	BB	AA	BB	AA	BB	BB	AA	AA	AA	BB	BB	BB	BB	BB	BB	AA	AA	BB	BB	-	AA	BB	AA	BB	AA	BB	-	AA	AA	-	AA	AA	AA	BB	BB	AA	BB	BB	BB	AA
IWA2926	wsnp_Ex_c2474_4619730	[A/G]	AA	BB	BB	-	BB	BB	AA	AA	BB	-	AA	AA	AA	AA	AA	BB	BB	BB	AA	AA	BB	AA	AA	AA	BB	AA	AA	BB	AA	BB	AA	BB	AA	BB	AA	AA	BB	BB	-	BB	AA	AA	BB	BB	BB	AA	BB
IWA3669	wsnp_Ex_c39124_46489956	[A/G]	AA	BB	AA	BB	BB	BB	BB	-	BB	BB	BB	BB	BB	AA	BB	BB	BB	BB	AA	AA	BB	AA	BB	AA	-	AA	BB	AA	BB	-	BB	BB	AA	BB	BB	AA	BB	BB	AA	BB	BB	BB	-	AA	AA	AA	AA
IWA64	wsnp_BE405834B_Ta_2_3	[A/G]	AA	BB	BB	AA	AA	AA	AA	AA	BB	BB	AA	AA	AA	BB	AA	BB	BB	BB	-	AA	AA	AA	BB	AA	AA	BB	BB	BB	AA	AA	AA	BB	AA	BB	BB	AA	AA	-	BB	AA	AA	BB	AA	BB	AA	BB	BB
IWA68	wsnp_BE406277B_Ta_1_2	[T/C]	AA	BB	BB	-	BB	AA	AA	BB	AA	AA	BB	BB	BB	AA	BB	AA	-	AA	BB	BB	-	BB	-	BB	AA	AA	AA	BB	BB	BB	AA	BB	AA	AA	BB	AA	BB	BB	AA	BB	BB	AA	-	AA	AA	BB	BB
IWA237	wsnp_BE490744A_Td_2_1	[A/G]	AA	BB	BB	AA	BB	BB	AA	BB	BB	AA	BB	BB	BB	AA	BB	BB	AA	AA	AA	AA	AA	AA	AA	BB	AA	BB	AA	BB	AA	AA	AA	BB	AA	BB	BB	AA	BB	BB	BB	AA	AA	-	AA	AA	BB	BB	BB
IWA305	wsnp_BE498209A_Ta_2_1	[A/G]	AA	BB	AA	BB	BB	BB	BB	AA	AA	BB	BB	-	BB	BB	AA	AA	BB	BB	-	AA	BB	AA	AA	BB	BB	BB	BB	AA	BB	AA	BB	AA	-	AA	AA	AA	BB	BB	AA	AA	AA	AA	BB	AA	BB	BB	AA
IWA330	wsnp_BE499835A_Ta_2_1	[A/G]	AA	BB	AA	AA	AA	AA	AA	AA	AA	AA	AA	AA	BB	BB	-	AA	BB	AA	AA	AA	BB	AA	BB	AA	BB	AA	AA	BB	AA	AA	-	AA	AA	BB	AA	AA	BB	BB	AA	AA	AA	AA	BB	BB	AA	AA	BB
IWA383	wsnp_BE591777A_Ta_1_1	[A/G]	AA	BB	BB	BB	AA	AA	BB	AA	AA	BB	AA	BB	BB	AA	-	BB	BB	BB	BB	BB	BB	AA	-	BB	AA	BB	BB	BB	AA	AA	AA	AA	AA	BB	AA	BB	BB	AA	AA	BB	BB	-	BB	AA	BB	BB	BB
IWA399	wsnp_BE607043A_Td_2_1	[T/C]	AA	BB	AA	AA	BB	AA	BB	AA	AA	BB	AA	AA	AA	AA	AA	BB	AA	BB	AA	AA	BB	AA	BB	AA	BB	AA	BB	AA	BB	BB	BB	AA	BB	AA	BB	AA	-	AA	BB	AA	AA	AA	-	AA	BB	AA	BB
IWA410	wsnp_BF145459D_Ta_2_1	[A/G]	AA	BB	AA	AA	BB	AA	AA	BB	-	-	BB	AA	BB	BB	AA	BB	-	BB	AA	-	BB	AA	-	-	BB	BB	BB	BB	AA	BB	BB	BB	BB	BB	BB	-	AA	AA	AA	AA	BB	BB	AA	-	AA	BB	BB
IWA420	wsnp_BF201102B_Ta_2_1	[A/C]	AA	BB	AA	BB	AA	BB	BB	BB	BB	BB	BB	AA	BB	-	AA	BB	AA	BB	BB	BB	AA	BB	BB	AA	-	BB	AA	AA	BB	BB	BB	AA	BB	AA	BB	BB	BB	BB	AA	AA	BB	AA	BB	AA	BB	BB	AA
IWA469	wsnp_BF473744B_Ta_2_1	[A/G]	AA	BB	BB	AA	BB	AA	AA	AA	AA	AA	AA	BB	BB	AA	BB	AA	BB	AA	BB	AA	-	BB	-	-	AA	AA	AA	BB	AA	AA	BB	BB	AA	AA	BB	AA	BB	BB	AA	-	BB	AA	-	AA	AA	BB	BB
IWA483	wsnp_BF474615A_Ta_1_4	[T/C]	AA	BB	BB	AA	BB	BB	AA	BB	BB	-	BB	AA	-	AA	BB	AA	BB	BB	AA	BB	-	BB	AA	AA	AA	AA	AA	AA	AA	AA	AA	BB	BB	AA	AA	-	AA	BB	AA	AA	BB	AA	AA	AA	BB	BB	BB
IWA648	wsnp_CAP11_c1116_654940	[T/C]	AA	BB	BB	-	BB	AA	BB	BB	AA	BB	BB	BB	BB	AA	AA	-	AA	BB	AA	-	BB	AA	AA	BB	BB	BB	BB	BB	AA	BB	AA	BB	AA	BB	BB	AA	BB	BB	AA	-	AA	AA	AA	BB	AA	BB	AA
IWA719	wsnp_CAP11_c2435_1256981	[T/G]	AA	BB	BB	BB	BB	BB	BB	AA	AA	BB	AA	BB	AA	AA	AA	AA	BB	BB	AA	AA	AA	AA	AA	BB	BB	AA	BB	BB	BB	AA	BB	AA	BB	AA	AA	BB	AA	BB	BB	BB	AA	AA	BB	AA	BB	BB	AA
IWA775	wsnp_CAP11_c543_375403	[A/G]	AA	BB	AA	AA	BB	AA	AA	AA	-	AA	-	AA	AA	BB	BB	AA	BB	BB	BB	AA	AA	BB	BB	BB	AA	BB	BB	BB	BB	AA	AA	BB	AA	BB	BB	AA	AA	BB	-	AA	AA	BB	AA	BB	AA	AA	BB
IWA824	wsnp_CAP11_c949_571734	[T/G]	AA	BB	BB	BB	BB	-	BB	BB	BB	BB	BB	AA	AA	AA	BB	BB	AA	AA	BB	AA	BB	BB	BB	BB	AA	-	BB	BB	BB	AA	BB	-	AA	BB	AA	BB	BB	AA	BB	AA	BB	AA	AA	AA	AA	BB	BB
IWA855	wsnp_CAP11_rep_c4226_1995152	[T/C]	AA	BB	-	AA	AA	AA	AA	BB	BB	AA	AA	BB	BB	AA	BB	BB	AA	AA	AA	AA	AA	-	AA	AA	BB	BB	BB	BB	AA	BB	AA	BB	BB	AA	AA	AA	AA	AA	BB	AA	BB	BB	BB	BB	AA	AA	BB
IWA868	wsnp_CAP11_rep_c4382_2067038	[T/C]	AA	BB	AA	AA	BB	BB	BB	AA	AA	BB	BB	AA	AA	-	AA	BB	AA	BB	-	AA	AA	-	AA	AA	BB	BB	AA	AA	AA	BB	BB	BB	BB	AA	AA	BB	BB	BB	AA	AA	AA	AA	-	BB	AA	BB	BB
IWA908	wsnp_CAP12_c1101_569783	[A/G]	AA	BB	AA	AA	BB	AA	AA	AA	-	-	BB	AA	BB	BB	AA	BB	BB	BB	AA	BB	BB	AA	-	BB	BB	BB	BB	BB	AA	BB	BB	BB	BB	AA	BB	-	AA	AA	AA	AA	BB	BB	AA	AA	AA	BB	-
IWA1005	wsnp_CAP12_rep_c4157_1894383	[A/G]	AA	BB	AA	AA	BB	AA	AA	AA	-	AA	-	AA	AA	BB	BB	AA	BB	BB	BB	AA	AA	BB	BB	BB	AA	BB	BB	BB	BB	AA	AA	BB	AA	BB	BB	AA	AA	BB	-	AA	AA	BB	AA	BB	AA	AA	BB
IWA1031	wsnp_CAP7_c1321_664478	[T/C]	AA	BB	BB	BB	BB	AA	BB	BB	AA	BB	AA	BB	AA	AA	AA	AA	BB	BB	AA	AA	BB	AA	BB	BB	BB	BB	BB	BB	BB	AA	BB	AA	BB	AA	AA	BB	AA	BB	BB	BB	AA	AA	BB	AA	AA	BB	AA
IWA1231	wsnp_CAP8_rep_c4452_2170021	[A/G]	AA	BB	AA	AA	BB	AA	AA	AA	-	AA	-	AA	AA	BB	BB	AA	BB	BB	BB	AA	AA	BB	BB	BB	AA	BB	BB	BB	BB	AA	AA	BB	AA	BB	BB	AA	AA	BB	-	AA	AA	BB	AA	BB	AA	AA	BB
IWA1241	wsnp_CAP8_rep_c8295_3722232	[T/C]	AA	BB	BB	-	BB	AA	AA	BB	AA	AA	AA	AA	AA	AA	BB	AA	AA	AA	AA	AA	AA	BB	BB	BB	AA	BB	BB	AA	BB	AA	BB	AA	BB	AA	BB	AA	BB	AA	BB	BB	BB	BB	AA	BB	BB	BB	BB
IWA32	wsnp_BE403597A_Ta_2_1	[A/G]	AA	BB	AA	AA	BB	AA	BB	AA	BB	AA	AA	AA	AA	AA	-	BB	AA	BB	AA	BB	BB	AA	BB	BB	BB	BB	AA	BB	AA	BB	AA	AA	BB	BB	AA	AA	BB	BB	AA	BB	BB	-	AA	BB	BB	AA	AA
IWA95	wsnp_BE426418A_Ta_2_2	[T/C]	AA	BB	BB	AA	AA	BB	AA	BB	AA	AA	AA	AA	AA	AA	AA	AA	AA	AA	BB	-	AA	BB	AA	AA	BB	BB	-	AA	AA	AA	AA	-	BB	AA	AA	BB	AA	AA	BB	-	BB	AA	BB	BB	AA	AA	AA
IWA442	wsnp_BF291974A_Ta_2_2	[A/G]	AA	BB	BB	BB	AA	AA	BB	AA	BB	BB	AA	BB	BB	AA	BB	AA	BB	BB	AA	BB	BB	AA	BB	BB	AA	BB	AA	BB	AA	AA	AA	AA	AA	BB	AA	BB	BB	AA	AA	BB	BB	AA	BB	AA	BB	BB	AA
IWA482	wsnp_BF474615A_Ta_1_1	[A/G]	AA	BB	BB	AA	BB	BB	AA	BB	BB	-	BB	AA	-	AA	BB	AA	BB	BB	AA	-	-	BB	AA	AA	AA	AA	AA	AA	AA	AA	AA	BB	BB	AA	AA	-	AA	BB	AA	AA	BB	AA	AA	AA	BB	BB	BB
IWA485	wsnp_BF474862A_Ta_2_1	[A/G]	AA	BB	BB	BB	BB	AA	AA	BB	BB	BB	BB	AA	-	AA	-	AA	BB	BB	BB	-	AA	BB	BB	-	BB	BB	BB	AA	BB	AA	BB	BB	BB	AA	BB	AA	BB	AA	AA	BB	BB	-	BB	AA	-	AA	BB
IWA541	wsnp_BG274584A_Ta_2_1	[A/G]	AA	BB	AA	AA	AA	AA	BB	AA	BB	BB	AA	BB	BB	BB	AA	AA	AA	BB	AA	BB	BB	AA	BB	BB	AA	BB	-	AA	AA	AA	AA	AA	BB	AA	BB	AA	AA	BB	BB	AA	BB	-	AA	-	BB	BB	AA
IWA569	wsnp_BG604678A_Ta_1_3	[T/C]	AA	BB	BB	AA	BB	BB	AA	BB	BB	-	BB	AA	-	AA	-	AA	BB	BB	AA	BB	-	BB	AA	AA	AA	AA	AA	AA	AA	AA	AA	BB	BB	AA	AA	-	AA	BB	AA	AA	BB	AA	AA	AA	BB	BB	BB
IWA620	wsnp_BQ166999B_Ta_2_1	[T/G]	AA	BB	-	-	-	AA	BB	BB	BB	-	BB	AA	AA	AA	AA	BB	BB	BB	BB	BB	AA	AA	BB	BB	AA	BB	AA	AA	AA	BB	BB	AA	AA	AA	AA	BB	AA	BB	-	BB	BB	AA	BB	AA	AA	BB	-
IWA850	wsnp_CAP11_rep_c4151_1963100	[T/C]	AA	BB	BB	BB	BB	BB	AA	AA	BB	-	AA	AA	AA	AA	AA	BB	BB	BB	AA	AA	BB	AA	AA	AA	BB	AA	AA	BB	AA	BB	AA	BB	AA	BB	AA	AA	BB	BB	-	BB	AA	AA	BB	BB	BB	AA	BB
IWA1000	wsnp_CAP12_rep_c4048_1842112	[T/C]	AA	BB	BB	BB	AA	AA	BB	AA	BB	BB	AA	BB	BB	AA	BB	AA	BB	BB	AA	BB	BB	AA	BB	BB	AA	BB	AA	BB	AA	AA	AA	AA	AA	BB	AA	BB	BB	AA	AA	BB	BB	AA	BB	AA	BB	BB	AA
IWA1044	wsnp_CAP7_c172_96407	[T/C]	AA	BB	BB	AA	BB	AA	AA	AA	BB	BB	BB	AA	BB	BB	AA	AA	AA	AA	AA	BB	AA	AA	BB	BB	BB	BB	AA	AA	BB	BB	AA	AA	BB	AA	AA	AA	BB	BB	BB	BB	BB	BB	BB	BB	BB	AA	BB
IWA1048	wsnp_CAP7_c1839_907899	[T/C]	AA	BB	AA	AA	BB	AA	BB	AA	AA	BB	AA	AA	AA	BB	AA	BB	-	BB	AA	AA	BB	AA	BB	AA	BB	AA	BB	BB	BB	BB	BB	AA	BB	AA	BB	AA	AA	AA	BB	AA	BB	AA	-	AA	BB	BB	BB
IWA1089	wsnp_CAP7_c44_26549	[A/C]	AA	BB	-	AA	BB	AA	AA	AA	AA	AA	AA	AA	AA	BB	BB	AA	AA	AA	AA	AA	BB	BB	BB	BB	AA	AA	AA	AA	BB	AA	BB	AA	AA	BB	BB	AA	BB	BB	BB	BB	BB	BB	AA	BB	BB	BB	AA
IWA1105	wsnp_CAP7_c8429_3785777	[A/G]	AA	BB	AA	AA	BB	AA	AA	BB	BB	BB	BB	AA	BB	BB	AA	BB	BB	BB	AA	BB	BB	AA	BB	BB	BB	BB	BB	AA	AA	BB	BB	BB	BB	BB	BB	BB	AA	AA	AA	AA	BB	BB	AA	BB	AA	BB	BB
IWA1151	wsnp_CAP8_c1540_889753	[A/G]	AA	BB	BB	BB	BB	BB	AA	AA	BB	BB	BB	BB	BB	BB	BB	BB	BB	AA	BB	BB	BB	BB	BB	BB	BB	-	BB	BB	BB	BB	BB	BB	BB	BB	BB	BB	AA	BB	BB	BB	AA	BB	BB	BB	AA	BB	BB
IWA1354	wsnp_Ex_c10571_17258682	[T/C]	AA	BB	AA	BB	AA	AA	BB	BB	AA	BB	BB	AA	BB	BB	BB	AA	BB	BB	AA	BB	AA	BB	BB	AA	BB	BB	BB	BB	AA	AA	-	AA	BB	BB	AA	AA	BB	AA	BB	AA	BB	BB	BB	BB	AA	AA	BB
IWA1361	wsnp_Ex_c106_217340	[A/G]	AA	BB	AA	-	AA	AA	BB	BB	AA	BB	BB	AA	BB	AA	BB	-	AA	BB	AA	BB	AA	AA	BB	AA	BB	BB	BB	BB	AA	AA	-	BB	BB	AA	BB	AA	BB	AA	BB	BB	BB	AA	AA	BB	AA	BB	BB
IWA1449	wsnp_Ex_c1116_2138756	[T/G]	AA	BB	BB	BB	BB	BB	BB	-	-	-	BB	BB	-	BB	BB	-	AA	BB	BB	AA	BB	BB	BB	AA	AA	AA	AA	BB	BB	BB	AA	BB	AA	BB	BB	AA	BB	BB	AA	BB	BB	BB	BB	BB	AA	AA	AA
IWA1512	wsnp_Ex_c11560_18632777	[T/C]	AA	BB	BB	AA	AA	BB	BB	BB	-	BB	AA	BB	BB	-	AA	AA	BB	BB	BB	AA	AA	BB	AA	BB	BB	BB	BB	BB	AA	BB	BB	BB	AA	BB	BB	AA	BB	AA	AA	-	BB	AA	BB	AA	BB	AA	AA
IWA1521	wsnp_Ex_c11619_18714738	[T/C]	AA	BB	BB	BB	BB	AA	AA	AA	BB	AA	BB	AA	BB	BB	AA	AA	AA	AA	BB	BB	AA	BB	AA	AA	BB	BB	AA	AA	BB	AA	BB	BB	BB	AA	BB	AA	BB	AA	AA	AA	BB	BB	BB	AA	BB	BB	BB
IWA1634	wsnp_Ex_c1246_2393249	[T/C]	AA	BB	BB	BB	AA	BB	BB	BB	BB	AA	AA	BB	AA	AA	AA	AA	BB	AA	AA	AA	AA	BB	BB	AA	AA	-	BB	BB	BB	BB	AA	AA	BB	BB	-	BB	BB	-	BB	BB	BB	AA	BB	BB	BB	AA	BB
IWA1670	wsnp_Ex_c12684_20157261	[T/C]	AA	BB	BB	BB	BB	AA	BB	BB	AA	BB	BB	BB	BB	BB	AA	BB	AA	BB	AA	BB	BB	AA	AA	BB	BB	AA	BB	BB	AA	BB	AA	BB	AA	BB	BB	AA	BB	BB	AA	BB	AA	AA	AA	BB	AA	BB	AA
IWA1720	wsnp_Ex_c13031_20625900	[A/G]	AA	BB	BB	AA	BB	AA	AA	AA	BB	AA	BB	AA	BB	-	AA	AA	-	BB	BB	-	-	BB	BB	BB	BB	AA	AA	AA	AA	AA	BB	BB	BB	AA	BB	-	BB	AA	AA	AA	BB	BB	AA	AA	AA	BB	BB
IWA1923	wsnp_Ex_c14687_22759306	[A/C]	AA	BB	AA	AA	BB	AA	AA	BB	-	-	BB	AA	BB	BB	AA	BB	-	BB	AA	-	BB	AA	-	-	BB	BB	BB	AA	AA	BB	BB	BB	BB	BB	BB	-	AA	AA	AA	AA	BB	BB	AA	-	AA	BB	BB
IWA1965	wsnp_Ex_c1498_2868339	[A/C]	AA	BB	-	AA	-	AA	BB	BB	BB	-	BB	AA	AA	AA	AA	BB	BB	BB	BB	BB	AA	BB	BB	BB	AA	BB	AA	AA	AA	BB	BB	AA	AA	AA	AA	BB	AA	BB	-	BB	BB	AA	BB	AA	AA	BB	-
IWA2000	wsnp_Ex_c15282_23505878	[A/G]	AA	BB	BB	AA	BB	BB	AA	BB	BB	BB	BB	AA	-	AA	-	AA	BB	AA	AA	-	BB	BB	AA	AA	AA	AA	AA	AA	AA	AA	AA	BB	BB	AA	AA	-	AA	BB	BB	AA	BB	AA	BB	AA	-	BB	BB
IWA2012	wsnp_Ex_c15341_23592177	[T/C]	AA	BB	BB	BB	BB	AA	BB	BB	AA	BB	BB	-	AA	AA	AA	AA	BB	AA	AA	AA	AA	AA	AA	BB	BB	-	BB	BB	BB	AA	BB	AA	BB	AA	AA	BB	BB	BB	BB	BB	AA	AA	BB	AA	BB	BB	AA
IWA2037	wsnp_Ex_c1558_2976128	[A/G]	AA	BB	AA	BB	BB	BB	AA	BB	BB	AA	BB	BB	AA	AA	BB	AA	AA	BB	AA	AA	BB	BB	AA	AA	AA	AA	AA	BB	BB	AA	AA	BB	AA	BB	AA	AA	AA	AA	AA	BB	AA	BB	BB	AA	AA	AA	BB
IWA2088	wsnp_Ex_c1602_3055066	[T/G]	AA	BB	AA	AA	BB	AA	BB	AA	BB	AA	AA	BB	BB	AA	BB	AA	AA	BB	AA	BB	BB	BB	AA	AA	BB	BB	BB	BB	BB	AA	BB	BB	BB	AA	BB	BB	BB	AA	AA	BB	BB	-	AA	AA	BB	BB	AA
IWA2098	wsnp_Ex_c16090_24522660	[A/G]	AA	BB	AA	BB	BB	AA	AA	-	BB	AA	AA	AA	BB	BB	BB	AA	-	AA	BB	BB	BB	AA	-	BB	AA	AA	AA	BB	BB	-	AA	BB	BB	BB	AA	AA	BB	AA	AA	AA	-	BB	AA	AA	AA	AA	BB
IWA2152	wsnp_Ex_c16592_25117132	[T/C]	AA	BB	BB	AA	AA	BB	BB	BB	AA	AA	BB	-	AA	AA	AA	AA	AA	BB	BB	BB	BB	-	AA	AA	AA	BB	BB	AA	BB	BB	AA	BB	BB	BB	BB	BB	AA	AA	AA	BB	BB	AA	BB	AA	AA	BB	AA
IWA2167	wsnp_Ex_c1676_3185400	[T/C]	AA	BB	AA	BB	BB	BB	BB	-	BB	BB	BB	BB	BB	AA	BB	BB	BB	BB	AA	AA	BB	AA	BB	AA	-	AA	BB	AA	BB	-	BB	BB	AA	BB	BB	AA	BB	BB	AA	BB	BB	BB	-	AA	AA	AA	AA
IWA2261	wsnp_Ex_c17845_26604587	[T/C]	AA	BB	BB	AA	BB	AA	AA	AA	AA	AA	AA	BB	BB	AA	BB	AA	BB	AA	BB	AA	-	BB	AA	AA	AA	AA	AA	BB	AA	AA	BB	BB	AA	AA	BB	AA	BB	BB	AA	AA	BB	AA	AA	AA	AA	BB	BB
IWA2274	wsnp_Ex_c1792_3381384	[T/C]	AA	BB	AA	AA	BB	AA	BB	AA	BB	AA	AA	BB	BB	AA	BB	AA	AA	BB	AA	BB	BB	BB	AA	AA	BB	-	BB	BB	BB	AA	BB	BB	BB	AA	BB	BB	BB	AA	AA	BB	BB	-	AA	AA	BB	BB	AA
IWA2275	wsnp_Ex_c1792_3381544	[T/C]	AA	BB	AA	AA	BB	AA	BB	AA	BB	AA	AA	BB	BB	AA	BB	AA	AA	BB	AA	BB	BB	BB	AA	AA	BB	BB	BB	BB	BB	AA	BB	BB	BB	AA	BB	BB	BB	AA	AA	BB	BB	-	AA	AA	BB	BB	AA
IWA2396	wsnp_Ex_c19309_28242774	[A/C]	AA	BB	BB	AA	AA	BB	AA	BB	AA	-	AA	BB	AA	AA	AA	AA	AA	AA	BB	AA	AA	BB	BB	AA	BB	BB	AA	AA	AA	AA	AA	BB	BB	AA	AA	-	AA	AA	AA	AA	BB	AA	BB	BB	AA	AA	AA
IWA2507	wsnp_Ex_c20062_29096454	[A/G]	AA	BB	BB	AA	AA	-	AA	BB	-	AA	BB	-	AA	BB	AA	AA	BB	BB	-	AA	BB	AA	BB	AA	AA	BB	BB	AA	AA	AA	BB	AA	-	BB	AA	AA	-	BB	AA	AA	AA	AA	BB	AA	BB	BB	AA
IWA2512	wsnp_Ex_c20169_29215401	[T/G]	AA	BB	BB	BB	BB	AA	AA	BB	AA	AA	BB	BB	BB	AA	BB	AA	BB	AA	BB	BB	BB	BB	BB	BB	AA	AA	AA	BB	BB	BB	AA	BB	AA	AA	BB	AA	BB	BB	AA	BB	BB	AA	-	AA	AA	BB	BB
IWA2532	wsnp_Ex_c20377_29442562	[A/G]	AA	BB	AA	AA	BB	AA	AA	BB	-	-	BB	AA	BB	BB	AA	BB	-	BB	AA	-	BB	AA	-	-	BB	BB	BB	AA	AA	BB	BB	BB	BB	BB	BB	-	AA	AA	AA	AA	BB	BB	AA	-	AA	BB	BB
IWA2595	wsnp_Ex_c21293_30421496	[T/C]	AA	BB	AA	BB	BB	AA	AA	AA	BB	AA	BB	BB	BB	BB	AA	BB	AA	AA	AA	BB	BB	AA	AA	BB	BB	BB	BB	BB	AA	AA	BB	BB	BB	BB	BB	AA	BB	-	AA	AA	BB	BB	AA	AA	AA	BB	AA
IWA2641	wsnp_Ex_c2171_4072774	[T/C]	AA	BB	BB	AA	BB	AA	AA	AA	AA	AA	BB	BB	BB	AA	AA	AA	AA	-	AA	AA	BB	AA	AA	BB	AA	AA	BB	AA	AA	AA	AA	AA	AA	BB	BB	AA	AA	BB	AA	BB	AA	AA	AA	BB	AA	BB	AA
IWA2646	wsnp_Ex_c2171_4074003	[A/G]	AA	BB	BB	AA	BB	AA	AA	AA	AA	AA	BB	BB	BB	AA	AA	AA	AA	-	AA	AA	BB	AA	AA	BB	AA	AA	BB	AA	AA	AA	AA	AA	AA	BB	BB	AA	AA	BB	AA	BB	AA	AA	AA	BB	AA	BB	AA
IWA2908	wsnp_Ex_c24548_33795073	[T/C]	AA	BB	AA	BB	BB	AA	BB	BB	AA	AA	AA	BB	AA	AA	BB	AA	AA	BB	AA	AA	BB	BB	AA	AA	AA	AA	BB	BB	BB	AA	AA	BB	AA	BB	AA	AA	AA	AA	-	AA	AA	BB	BB	AA	AA	AA	BB
IWA2995	wsnp_Ex_c25734_34995416	[T/C]	AA	BB	BB	AA	AA	BB	BB	BB	AA	AA	-	-	AA	AA	AA	AA	AA	BB	BB	BB	BB	-	AA	AA	AA	BB	BB	AA	BB	BB	AA	BB	BB	BB	BB	BB	AA	AA	AA	-	BB	AA	-	AA	AA	BB	AA
IWA3089	wsnp_Ex_c271_521429	[T/C]	AA	BB	BB	AA	AA	BB	AA	BB	BB	AA	BB	BB	AA	AA	BB	BB	AA	BB	BB	BB	BB	AA	AA	BB	AA	AA	AA	BB	BB	AA	BB	AA	BB	BB	AA	AA	BB	BB	AA	BB	BB	BB	BB	BB	BB	BB	BB
IWA3106	wsnp_Ex_c27272_36480685	[T/G]	AA	BB	BB	-	BB	AA	BB	BB	BB	-	BB	AA	AA	AA	AA	BB	BB	BB	BB	BB	AA	AA	BB	BB	AA	BB	AA	AA	AA	BB	BB	AA	AA	AA	AA	BB	AA	BB	BB	BB	BB	AA	BB	AA	AA	BB	BB
IWA3129	wsnp_Ex_c27914_37074773	[T/C]	AA	BB	BB	-	BB	AA	BB	BB	AA	AA	BB	AA	BB	AA	BB	-	AA	BB	AA	BB	AA	BB	BB	BB	BB	BB	BB	AA	AA	AA	BB	AA	BB	BB	BB	AA	BB	AA	BB	BB	BB	AA	AA	BB	BB	BB	BB
IWA3130	wsnp_Ex_c27914_37075168	[A/G]	AA	BB	BB	-	BB	AA	BB	BB	AA	AA	BB	AA	BB	AA	BB	-	AA	BB	AA	BB	AA	BB	BB	BB	BB	BB	BB	AA	AA	AA	BB	AA	BB	BB	BB	AA	BB	AA	BB	BB	BB	AA	AA	BB	BB	BB	BB
IWA3159	wsnp_Ex_c284_548711	[T/C]	AA	BB	AA	AA	AA	AA	BB	BB	AA	BB	BB	-	-	BB	AA	AA	AA	BB	AA	BB	BB	AA	BB	AA	BB	BB	BB	AA	BB	BB	AA	AA	AA	BB	BB	AA	BB	AA	AA	AA	AA	AA	AA	AA	AA	AA	BB
IWA3177	wsnp_Ex_c28679_37784735	[T/G]	AA	BB	BB	AA	AA	BB	AA	BB	AA	AA	AA	BB	AA	AA	AA	AA	BB	BB	BB	AA	AA	BB	BB	AA	BB	BB	AA	AA	AA	AA	AA	BB	BB	AA	AA	AA	AA	AA	AA	-	BB	AA	BB	BB	AA	AA	AA
IWA3253	wsnp_Ex_c29867_38850724	[T/G]	AA	BB	AA	BB	BB	AA	AA	AA	BB	AA	BB	BB	BB	BB	AA	BB	BB	AA	AA	AA	BB	AA	AA	BB	BB	BB	BB	BB	AA	AA	BB	BB	BB	BB	BB	AA	AA	BB	AA	AA	BB	BB	AA	AA	AA	BB	BB
IWA3287	wsnp_Ex_c30581_39482788	[T/C]	AA	BB	AA	AA	BB	AA	AA	BB	BB	BB	BB	AA	BB	BB	AA	BB	BB	BB	AA	BB	BB	AA	BB	BB	BB	BB	BB	BB	AA	BB	BB	BB	BB	BB	BB	BB	AA	AA	AA	AA	BB	BB	AA	BB	AA	BB	BB
IWA3423	wsnp_Ex_c3309_6096114	[A/G]	AA	BB	AA	BB	AA	AA	BB	BB	AA	BB	BB	AA	BB	BB	BB	AA	BB	BB	AA	BB	AA	BB	BB	AA	BB	BB	BB	BB	AA	AA	-	AA	BB	BB	AA	AA	BB	AA	BB	AA	BB	BB	BB	BB	AA	AA	BB
IWA3519	wsnp_Ex_c3530_6459643	[A/G]	AA	BB	BB	AA	AA	BB	BB	BB	BB	AA	AA	AA	AA	AA	AA	BB	-	BB	AA	AA	BB	BB	BB	AA	BB	AA	BB	AA	AA	BB	-	BB	AA	AA	AA	AA	BB	-	AA	AA	BB	AA	AA	AA	BB	BB	AA
IWA3606	wsnp_Ex_c37410_45162707	[T/G]	AA	BB	AA	AA	AA	BB	BB	BB	BB	BB	BB	AA	BB	BB	AA	BB	AA	BB	BB	BB	AA	BB	-	AA	-	BB	AA	AA	BB	BB	BB	BB	BB	AA	BB	BB	BB	BB	AA	AA	BB	AA	BB	AA	AA	BB	BB
IWA3607	wsnp_Ex_c37410_45162932	[A/G]	AA	BB	AA	AA	AA	BB	BB	BB	BB	BB	BB	AA	BB	BB	AA	BB	AA	BB	BB	BB	AA	-	-	AA	-	BB	AA	AA	BB	BB	BB	-	BB	AA	BB	BB	BB	BB	AA	AA	BB	AA	BB	AA	AA	BB	-
IWA3652	wsnp_Ex_c3858_7011837	[T/C]	AA	BB	BB	BB	BB	BB	AA	BB	BB	BB	BB	BB	BB	BB	BB	BB	BB	AA	BB	BB	BB	BB	BB	BB	BB	-	BB	BB	BB	BB	BB	BB	BB	BB	BB	BB	AA	BB	BB	BB	AA	BB	BB	BB	BB	BB	BB
IWA3892	wsnp_Ex_c4436_7981037	[A/G]	AA	BB	AA	-	AA	BB	BB	BB	BB	BB	BB	AA	AA	BB	AA	AA	-	AA	BB	AA	BB	BB	AA	-	AA	BB	-	-	AA	BB	AA	BB	AA	AA	BB	BB	AA	BB	AA	AA	AA	AA	-	BB	BB	AA	BB
IWA3903	wsnp_Ex_c4464_8030618	[A/G]	AA	BB	BB	BB	AA	BB	AA	BB	BB	AA	BB	BB	AA	BB	AA	AA	BB	BB	BB	AA	BB	AA	AA	BB	AA	BB	BB	AA	AA	AA	BB	AA	BB	AA	AA	AA	BB	BB	AA	AA	AA	BB	BB	AA	BB	BB	AA
IWA3909	wsnp_Ex_c4480_8054926	[A/G]	AA	BB	BB	BB	AA	AA	BB	-	BB	BB	AA	BB	BB	AA	-	AA	BB	BB	AA	BB	BB	AA	BB	BB	AA	BB	AA	BB	BB	AA	AA	AA	AA	BB	AA	BB	BB	AA	AA	BB	BB	AA	BB	AA	BB	BB	AA
IWA3956	wsnp_Ex_c4605_8240189	[T/C]	AA	BB	BB	AA	AA	BB	BB	BB	AA	AA	BB	AA	BB	AA	AA	AA	AA	BB	BB	BB	BB	-	AA	AA	AA	BB	BB	AA	BB	BB	AA	AA	BB	BB	BB	BB	BB	AA	BB	BB	BB	AA	-	BB	AA	BB	AA
IWA3984	wsnp_Ex_c4710_8412517	[A/C]	AA	BB	-	BB	AA	BB	BB	AA	AA	AA	BB	BB	AA	BB	AA	BB	AA	BB	AA	-	BB	AA	BB	BB	AA	AA	AA	AA	AA	AA	BB	BB	AA	AA	AA	BB	AA	AA	AA	BB	BB	BB	BB	BB	AA	BB	AA
IWA3991	wsnp_Ex_c4728_8444212	[T/C]	AA	BB	BB	BB	BB	BB	BB	AA	BB	AA	AA	AA	BB	BB	BB	AA	BB	AA	BB	BB	BB	AA	BB	-	BB	AA	BB	BB	BB	-	AA	BB	BB	BB	BB	BB	BB	AA	AA	AA	BB	AA	AA	BB	AA	AA	BB
IWA4036	wsnp_Ex_c48789_53586502	[T/C]	AA	BB	AA	AA	BB	AA	AA	AA	AA	BB	AA	AA	AA	AA	AA	BB	AA	BB	AA	AA	BB	AA	BB	AA	BB	AA	BB	AA	BB	BB	BB	AA	BB	AA	BB	AA	-	AA	BB	AA	AA	-	-	AA	BB	AA	BB
IWA4117	wsnp_Ex_c5192_9203682	[A/G]	AA	BB	BB	AA	AA	AA	BB	BB	AA	AA	-	AA	AA	BB	AA	AA	AA	BB	BB	BB	-	AA	AA	AA	AA	BB	BB	AA	BB	BB	AA	BB	BB	BB	BB	BB	AA	AA	AA	-	BB	AA	-	AA	AA	BB	AA
IWA4144	wsnp_Ex_c52509_56082802	[T/C]	AA	BB	AA	BB	AA	BB	BB	AA	AA	AA	AA	AA	AA	AA	BB	BB	AA	BB	BB	AA	BB	BB	BB	-	BB	BB	AA	AA	AA	-	AA	AA	-	BB	AA	BB	AA	BB	AA	AA	BB	AA	AA	AA	BB	BB	BB
IWA4189	wsnp_Ex_c5363_9482943	[A/G]	AA	BB	BB	-	BB	AA	BB	BB	AA	AA	BB	BB	BB	-	AA	AA	AA	BB	BB	BB	AA	BB	-	BB	AA	BB	BB	BB	BB	BB	AA	BB	AA	AA	BB	AA	BB	BB	AA	-	-	AA	AA	AA	BB	BB	AA
IWA4192	wsnp_Ex_c53729_56868062	[T/C]	AA	BB	BB	BB	BB	AA	BB	BB	BB	BB	AA	BB	BB	AA	BB	BB	AA	AA	BB	BB	AA	BB	AA	BB	-	BB	BB	AA	AA	AA	BB	BB	AA	BB	AA	BB	AA	AA	BB	BB	BB	BB	-	BB	AA	AA	BB
IWA4254	wsnp_Ex_c5492_9691880	[A/G]	AA	BB	BB	AA	BB	BB	AA	BB	BB	BB	BB	AA	BB	AA	AA	AA	BB	AA	AA	BB	BB	BB	AA	AA	AA	AA	AA	AA	AA	AA	AA	BB	BB	AA	AA	AA	AA	BB	BB	AA	BB	AA	BB	AA	-	BB	BB
IWA4316	wsnp_Ex_c5679_9976893	[T/C]	AA	BB	AA	AA	BB	AA	AA	AA	-	AA	-	AA	AA	BB	BB	AA	BB	BB	BB	AA	AA	BB	BB	AA	AA	BB	BB	BB	AA	AA	AA	BB	AA	BB	BB	AA	AA	BB	-	AA	AA	BB	AA	BB	AA	AA	BB
IWA4350	wsnp_Ex_c5780_10154132	[T/C]	AA	BB	BB	BB	AA	BB	AA	AA	AA	AA	BB	BB	BB	AA	AA	AA	-	AA	-	BB	AA	-	AA	-	BB	AA	BB	AA	AA	BB	BB	AA	BB	BB	BB	BB	BB	BB	BB	BB	BB	AA	BB	AA	AA	AA	BB
IWA4351	wsnp_Ex_c57982_59470152	[A/G]	AA	BB	BB	BB	AA	AA	AA	AA	AA	AA	BB	BB	BB	AA	AA	BB	-	AA	-	BB	AA	BB	BB	-	BB	AA	BB	AA	AA	BB	BB	AA	AA	BB	BB	AA	BB	BB	BB	BB	BB	AA	AA	AA	AA	AA	AA
IWA4431	wsnp_Ex_c6139_10739829	[A/G]	AA	BB	BB	AA	BB	BB	AA	BB	BB	-	BB	AA	-	AA	BB	AA	BB	BB	AA	-	-	BB	AA	AA	AA	AA	AA	AA	AA	AA	AA	BB	BB	AA	AA	-	AA	BB	AA	AA	BB	AA	AA	AA	BB	BB	BB
IWA4501	wsnp_Ex_c6401_11124623	[A/G]	AA	BB	BB	-	BB	BB	AA	BB	BB	BB	AA	BB	BB	BB	BB	BB	BB	AA	BB	BB	BB	BB	BB	BB	BB	-	BB	BB	BB	-	BB	-	BB	BB	BB	BB	AA	BB	BB	BB	AA	BB	BB	BB	BB	BB	BB
IWA4502	wsnp_Ex_c6401_11124792	[T/C]	AA	BB	BB	BB	BB	BB	AA	BB	BB	BB	AA	BB	BB	BB	BB	BB	BB	AA	BB	BB	BB	BB	BB	BB	BB	-	BB	BB	BB	BB	BB	BB	BB	BB	BB	BB	AA	BB	BB	BB	AA	BB	BB	BB	BB	BB	BB
IWA4549	wsnp_Ex_c6590_11419735	[T/C]	AA	BB	BB	-	BB	AA	AA	BB	AA	AA	AA	AA	AA	AA	BB	AA	AA	AA	AA	AA	AA	BB	BB	BB	AA	BB	BB	AA	BB	AA	BB	AA	BB	AA	BB	AA	BB	AA	BB	BB	BB	BB	AA	BB	BB	BB	BB
IWA4603	wsnp_Ex_c7002_12063380	[A/G]	AA	BB	BB	BB	AA	AA	BB	AA	BB	BB	AA	BB	BB	AA	-	AA	BB	BB	AA	BB	BB	AA	-	BB	AA	BB	AA	BB	AA	AA	AA	AA	AA	BB	AA	BB	BB	AA	AA	BB	BB	AA	BB	AA	-	BB	BB
IWA4629	wsnp_Ex_c7168_12311649	[A/G]	AA	BB	BB	BB	AA	BB	AA	AA	AA	AA	AA	AA	AA	AA	BB	BB	BB	AA	AA	AA	BB	AA	AA	AA	BB	BB	AA	BB	AA	AA	AA	BB	BB	BB	AA	AA	-	BB	BB	BB	BB	AA	BB	BB	BB	AA	BB
IWA4699	wsnp_Ex_c7546_12900094	[T/C]	AA	BB	BB	BB	AA	AA	BB	-	-	BB	AA	BB	BB	AA	-	AA	BB	BB	AA	BB	BB	AA	BB	BB	AA	BB	BB	BB	BB	BB	AA	AA	AA	BB	AA	BB	BB	AA	AA	BB	BB	-	BB	AA	BB	BB	AA
IWA4766	wsnp_Ex_c807_1586158	[T/C]	AA	BB	AA	AA	AA	AA	AA	AA	AA	AA	AA	AA	BB	BB	-	AA	BB	AA	AA	AA	BB	AA	BB	AA	BB	AA	AA	BB	AA	AA	-	AA	AA	BB	AA	AA	BB	BB	AA	AA	AA	AA	BB	BB	AA	AA	BB
IWA4801	wsnp_Ex_c8386_14128029	[A/C]	AA	BB	AA	BB	BB	AA	BB	BB	AA	AA	AA	BB	AA	AA	BB	AA	AA	BB	AA	AA	BB	BB	AA	AA	AA	AA	BB	BB	BB	AA	AA	BB	AA	BB	AA	AA	AA	AA	-	AA	AA	BB	BB	AA	AA	AA	BB
IWA4804	wsnp_Ex_c8409_14170476	[A/G]	AA	BB	BB	AA	-	AA	AA	AA	AA	AA	AA	AA	BB	AA	AA	AA	BB	AA	BB	BB	BB	BB	BB	BB	BB	BB	AA	BB	AA	AA	AA	AA	BB	AA	AA	AA	BB	BB	BB	BB	BB	AA	AA	BB	AA	BB	BB
IWA4873	wsnp_Ex_c908_1754208	[T/C]	AA	BB	BB	-	BB	AA	AA	BB	AA	AA	BB	AA	BB	AA	BB	-	AA	AA	AA	BB	AA	BB	BB	BB	BB	BB	BB	AA	AA	AA	BB	AA	BB	BB	BB	AA	BB	AA	BB	BB	BB	AA	AA	BB	BB	BB	BB
IWA4888	wsnp_Ex_c9179_15264221	[A/G]	AA	BB	BB	AA	BB	AA	AA	AA	BB	BB	BB	AA	BB	BB	AA	AA	AA	AA	AA	BB	AA	AA	BB	BB	BB	BB	AA	AA	BB	BB	AA	AA	BB	AA	AA	AA	BB	BB	BB	BB	BB	BB	BB	BB	BB	AA	BB
IWA4898	wsnp_Ex_c9343_15514687	[T/G]	AA	BB	BB	AA	AA	BB	AA	BB	BB	AA	BB	BB	AA	AA	BB	BB	AA	BB	BB	BB	BB	AA	-	BB	AA	AA	AA	BB	BB	AA	BB	AA	BB	BB	AA	AA	BB	BB	AA	BB	BB	BB	BB	BB	BB	BB	BB
IWA4935	wsnp_Ex_c955_1827567	[A/G]	AA	BB	AA	-	-	BB	BB	BB	BB	AA	AA	BB	AA	AA	AA	AA	BB	AA	BB	AA	BB	-	AA	-	AA	BB	AA	AA	AA	BB	AA	BB	AA	AA	AA	BB	AA	AA	AA	AA	AA	AA	AA	BB	BB	AA	BB
IWA4968	wsnp_Ex_c9813_16193780	[T/C]	AA	BB	BB	-	BB	AA	AA	BB	AA	AA	AA	AA	AA	AA	BB	AA	AA	AA	AA	AA	AA	BB	BB	BB	AA	BB	BB	AA	BB	AA	BB	AA	BB	AA	BB	AA	BB	AA	BB	BB	BB	BB	AA	BB	BB	BB	BB
IWA4999	wsnp_Ex_rep_c101231_86636951	[A/G]	AA	BB	AA	AA	BB	AA	AA	AA	-	AA	-	AA	AA	BB	BB	AA	BB	AA	BB	AA	AA	BB	AA	BB	AA	BB	BB	BB	BB	AA	AA	BB	AA	BB	BB	AA	AA	BB	-	AA	AA	BB	AA	BB	AA	AA	BB
IWA5002	wsnp_Ex_rep_c101323_86702413	[A/G]	AA	BB	BB	BB	BB	AA	BB	BB	AA	BB	BB	BB	BB	AA	AA	BB	AA	BB	AA	BB	BB	AA	AA	BB	BB	BB	BB	BB	AA	BB	AA	BB	AA	BB	BB	AA	BB	BB	AA	BB	AA	AA	AA	BB	AA	BB	AA
IWA5003	wsnp_Ex_rep_c101323_86702546	[A/C]	AA	BB	BB	BB	BB	AA	BB	BB	AA	BB	BB	BB	BB	AA	AA	BB	AA	BB	AA	BB	BB	AA	AA	BB	BB	BB	BB	BB	AA	BB	AA	BB	AA	BB	BB	AA	BB	BB	AA	BB	AA	AA	AA	BB	AA	BB	AA
IWA5047	wsnp_Ex_rep_c102067_87314043	[A/C]	AA	BB	BB	AA	AA	BB	AA	BB	BB	AA	AA	AA	AA	AA	BB	BB	AA	BB	BB	BB	BB	AA	BB	BB	AA	BB	-	AA	BB	BB	BB	BB	BB	AA	AA	BB	AA	AA	AA	AA	BB	AA	BB	BB	BB	AA	BB
IWA5112	wsnp_Ex_rep_c104141_88935451	[A/C]	AA	BB	BB	AA	AA	BB	AA	BB	AA	-	AA	AA	AA	AA	AA	AA	AA	AA	BB	AA	AA	BB	AA	AA	BB	BB	AA	AA	AA	AA	AA	BB	BB	AA	AA	-	AA	AA	BB	AA	BB	AA	BB	BB	AA	AA	AA
IWA5123	wsnp_Ex_rep_c104859_89444355	[A/G]	AA	BB	BB	AA	BB	BB	AA	BB	BB	BB	BB	AA	BB	AA	AA	AA	BB	BB	AA	BB	BB	BB	AA	AA	AA	AA	AA	AA	AA	AA	AA	BB	BB	AA	AA	-	AA	BB	BB	AA	BB	AA	AA	AA	BB	BB	BB
IWA5152	wsnp_Ex_rep_c106527_90571247	[T/C]	AA	BB	BB	BB	BB	AA	AA	BB	BB	BB	BB	AA	-	AA	-	AA	BB	BB	BB	-	AA	BB	BB	-	BB	BB	BB	AA	BB	AA	BB	BB	BB	AA	BB	AA	BB	AA	AA	BB	BB	BB	BB	AA	-	AA	BB
IWA5168	wsnp_Ex_rep_c108679_91802578	[T/C]	AA	BB	BB	BB	BB	AA	BB	BB	AA	AA	BB	BB	BB	-	-	AA	AA	BB	BB	BB	AA	BB	-	BB	AA	BB	BB	BB	BB	BB	AA	BB	AA	AA	BB	AA	BB	BB	AA	BB	-	AA	-	AA	BB	BB	AA
IWA5190	wsnp_Ex_rep_c66274_64426834	[T/C]	AA	BB	BB	AA	AA	BB	AA	BB	AA	-	AA	BB	AA	AA	AA	AA	AA	AA	BB	AA	AA	BB	BB	AA	BB	BB	AA	AA	AA	AA	AA	BB	BB	AA	AA	BB	AA	AA	AA	-	BB	AA	BB	BB	AA	AA	AA
IWA5238	wsnp_Ex_rep_c66433_64661643	[A/G]	AA	BB	AA	AA	BB	AA	BB	AA	AA	BB	AA	AA	AA	BB	AA	BB	-	BB	AA	AA	BB	AA	BB	AA	BB	AA	BB	BB	BB	BB	BB	AA	BB	AA	BB	AA	AA	AA	BB	AA	BB	AA	-	AA	BB	BB	BB
IWA5280	wsnp_Ex_rep_c66651_64963120	[A/G]	AA	BB	-	AA	-	AA	BB	BB	AA	-	BB	AA	AA	AA	AA	BB	BB	BB	BB	BB	AA	AA	BB	BB	AA	BB	AA	AA	AA	BB	BB	AA	AA	AA	AA	BB	AA	BB	-	BB	BB	AA	BB	AA	AA	BB	-
IWA5284	wsnp_Ex_rep_c66685_65003087	[A/G]	AA	BB	BB	AA	BB	BB	AA	BB	BB	AA	BB	BB	BB	AA	BB	BB	AA	AA	AA	AA	AA	AA	AA	BB	AA	BB	AA	BB	AA	AA	BB	BB	AA	BB	BB	AA	BB	BB	BB	AA	AA	BB	AA	AA	BB	BB	BB
IWA5337	wsnp_Ex_rep_c66939_65371026	[A/G]	AA	BB	BB	AA	BB	BB	BB	AA	BB	AA	BB	BB	AA	BB	AA	BB	AA	AA	BB	BB	AA	BB	AA	BB	BB	AA	AA	BB	BB	AA	AA	BB	BB	AA	AA	AA	BB	BB	AA	AA	BB	BB	AA	AA	BB	BB	BB
IWA5342	wsnp_Ex_rep_c66982_65424216	[T/C]	AA	BB	BB	AA	AA	BB	BB	BB	-	BB	AA	BB	BB	-	AA	AA	BB	BB	BB	AA	AA	BB	AA	BB	BB	BB	BB	BB	AA	BB	BB	BB	AA	BB	BB	AA	BB	AA	AA	BB	BB	AA	BB	AA	BB	AA	AA
IWA5345	wsnp_Ex_rep_c67012_65465341	[T/C]	AA	BB	BB	BB	BB	BB	AA	BB	BB	BB	BB	BB	BB	BB	BB	BB	BB	AA	BB	BB	BB	BB	BB	BB	BB	-	BB	BB	BB	BB	BB	BB	BB	BB	BB	BB	AA	BB	BB	BB	AA	BB	BB	BB	-	BB	BB
IWA5423	wsnp_Ex_rep_c67619_66272209	[T/C]	AA	BB	BB	AA	AA	BB	BB	BB	-	BB	AA	BB	BB	-	AA	AA	BB	BB	BB	AA	AA	BB	AA	BB	BB	BB	BB	BB	AA	BB	BB	BB	AA	BB	BB	AA	BB	AA	AA	BB	BB	AA	BB	AA	BB	AA	AA
IWA5503	wsnp_Ex_rep_c68165_66935148	[T/C]	AA	BB	BB	AA	AA	BB	BB	BB	BB	AA	AA	AA	AA	AA	AA	BB	-	BB	AA	AA	BB	BB	BB	AA	BB	AA	BB	AA	AA	BB	-	BB	AA	AA	AA	AA	BB	-	AA	AA	BB	AA	AA	AA	BB	BB	AA
IWA5551	wsnp_Ex_rep_c68600_67448893	[T/G]	AA	BB	BB	BB	AA	-	BB	AA	BB	BB	AA	BB	AA	BB	AA	BB	BB	BB	-	BB	BB	BB	AA	AA	AA	AA	AA	BB	AA	AA	BB	BB	AA	AA	AA	BB	AA	AA	AA	BB	BB	BB	BB	AA	AA	BB	AA
IWA5605	wsnp_Ex_rep_c69373_68311942	[T/C]	AA	BB	BB	BB	BB	-	BB	BB	BB	BB	BB	AA	AA	AA	BB	BB	AA	AA	BB	AA	BB	BB	BB	BB	AA	-	BB	BB	BB	AA	BB	-	AA	BB	AA	BB	BB	AA	BB	AA	BB	AA	AA	AA	AA	BB	BB
IWA5722	wsnp_Ex_rep_c71062_69901558	[T/C]	AA	BB	AA	AA	BB	BB	AA	BB	BB	BB	AA	BB	BB	BB	BB	BB	BB	AA	BB	BB	BB	BB	BB	BB	BB	-	BB	BB	BB	BB	BB	BB	BB	BB	BB	BB	AA	AA	BB	BB	AA	BB	BB	BB	BB	BB	BB
IWA5734	wsnp_Ex_rep_c72011_70562321	[T/G]	AA	BB	-	AA	AA	BB	AA	-	BB	AA	BB	BB	AA	BB	BB	BB	AA	BB	BB	BB	BB	AA	AA	BB	AA	AA	AA	AA	BB	-	BB	AA	BB	BB	AA	BB	BB	BB	AA	BB	BB	BB	AA	BB	BB	BB	BB
IWA5758	wsnp_Ex_rep_c88749_79992654	[A/G]	AA	BB	AA	-	-	BB	BB	BB	BB	AA	AA	BB	AA	AA	AA	AA	BB	AA	BB	AA	BB	-	AA	-	AA	BB	-	AA	AA	BB	BB	BB	AA	AA	BB	BB	AA	AA	AA	AA	AA	AA	AA	BB	BB	AA	BB
IWA5768	wsnp_Ex_rep_c98716_85135069	[T/C]	AA	BB	BB	BB	AA	AA	BB	-	BB	BB	AA	BB	BB	AA	-	AA	BB	BB	AA	BB	BB	AA	BB	BB	AA	BB	AA	BB	BB	AA	AA	AA	AA	BB	AA	BB	BB	AA	AA	BB	BB	AA	BB	AA	BB	BB	AA
IWA5778	wsnp_JD_c10969_11530496	[T/C]	AA	BB	AA	AA	BB	AA	AA	AA	AA	BB	AA	AA	AA	AA	AA	BB	AA	BB	AA	AA	BB	AA	BB	AA	BB	AA	BB	AA	BB	BB	BB	AA	BB	AA	BB	AA	-	AA	BB	AA	AA	-	-	AA	BB	AA	BB
IWA5800	wsnp_JD_c1219_1768165	[T/C]	AA	BB	BB	BB	BB	BB	BB	BB	BB	AA	AA	BB	BB	AA	AA	BB	BB	AA	BB	BB	AA	BB	BB	BB	AA	BB	BB	BB	-	AA	AA	AA	AA	AA	AA	-	BB	BB	AA	BB	AA	AA	BB	AA	BB	AA	BB
IWA5857	wsnp_JD_c15167_14703349	[T/C]	AA	BB	BB	BB	BB	BB	BB	AA	BB	AA	AA	AA	BB	BB	BB	AA	BB	AA	BB	BB	BB	AA	BB	-	BB	AA	BB	BB	BB	-	AA	BB	BB	BB	BB	BB	BB	AA	AA	AA	BB	AA	AA	BB	AA	AA	BB
IWA5943	wsnp_JD_c23373_19987039	[T/G]	AA	BB	BB	BB	BB	BB	BB	AA	BB	AA	AA	AA	BB	BB	BB	AA	BB	AA	BB	BB	BB	AA	BB	-	BB	AA	BB	BB	BB	-	AA	BB	BB	BB	BB	BB	BB	AA	AA	AA	BB	AA	AA	BB	AA	AA	BB
IWA5977	wsnp_JD_c2863_3822253	[A/G]	AA	BB	-	BB	BB	BB	BB	-	BB	-	BB	AA	-	BB	BB	-	AA	-	BB	AA	BB	BB	BB	AA	AA	AA	BB	BB	BB	AA	AA	BB	AA	BB	BB	AA	BB	AA	AA	BB	BB	BB	BB	BB	AA	BB	AA
IWA6112	wsnp_JD_c5795_6955627	[A/G]	AA	BB	BB	AA	AA	AA	BB	BB	BB	BB	AA	BB	AA	BB	AA	BB	BB	BB	AA	BB	AA	BB	AA	AA	AA	AA	AA	AA	AA	BB	BB	BB	AA	AA	-	BB	AA	BB	AA	AA	BB	AA	BB	BB	AA	BB	BB
IWA6116	wsnp_JD_c5872_7032077	[A/G]	AA	BB	BB	BB	AA	AA	BB	AA	BB	BB	AA	BB	BB	AA	-	AA	BB	BB	AA	BB	BB	AA	-	BB	AA	BB	AA	BB	AA	AA	AA	AA	AA	BB	AA	BB	BB	AA	AA	BB	BB	AA	BB	AA	-	BB	BB
IWA6247	wsnp_JD_rep_c48797_33040150	[T/C]	AA	BB	AA	AA	BB	AA	AA	AA	AA	BB	AA	AA	AA	AA	AA	BB	AA	BB	AA	AA	BB	AA	BB	AA	BB	AA	BB	AA	BB	BB	BB	AA	BB	AA	BB	AA	-	AA	BB	AA	AA	-	-	AA	BB	AA	BB
IWA6253	wsnp_JD_rep_c49006_33254974	[A/G]	AA	BB	BB	AA	AA	BB	AA	BB	BB	BB	BB	BB	BB	AA	BB	BB	AA	BB	BB	BB	BB	AA	BB	BB	AA	AA	AA	BB	BB	AA	BB	AA	BB	BB	BB	BB	BB	BB	AA	AA	BB	BB	AA	BB	BB	-	AA
IWA6261	wsnp_JD_rep_c49381_33599909	[A/G]	AA	BB	BB	BB	BB	-	BB	BB	AA	BB	AA	BB	AA	AA	AA	AA	BB	BB	AA	AA	AA	AA	BB	BB	BB	-	BB	BB	BB	AA	BB	AA	BB	AA	AA	BB	AA	BB	BB	BB	AA	-	BB	AA	AA	BB	AA
IWA6383	wsnp_Ku_c10296_17072695	[T/C]	AA	BB	AA	AA	-	AA	BB	BB	-	AA	BB	AA	AA	AA	AA	BB	BB	BB	BB	BB	AA	AA	AA	BB	AA	BB	AA	AA	AA	BB	BB	AA	AA	AA	BB	BB	AA	BB	-	BB	BB	AA	BB	BB	AA	BB	BB
IWA6402	wsnp_Ku_c10586_17464696	[T/C]	AA	BB	AA	AA	AA	BB	BB	BB	AA	BB	BB	AA	AA	-	AA	BB	AA	BB	-	BB	AA	-	-	AA	BB	BB	AA	AA	AA	BB	BB	-	BB	AA	BB	BB	BB	BB	AA	AA	-	AA	-	BB	AA	BB	AA
IWA6411	wsnp_Ku_c10939_17975681	[T/C]	AA	BB	BB	-	AA	AA	BB	BB	AA	AA	BB	AA	BB	AA	BB	-	AA	BB	AA	BB	AA	AA	BB	BB	BB	BB	BB	AA	AA	AA	BB	AA	BB	BB	BB	AA	BB	AA	BB	BB	BB	AA	AA	BB	BB	BB	BB
IWA6429	wsnp_Ku_c11721_19085513	[A/G]	AA	BB	-	-	-	AA	BB	BB	BB	-	BB	AA	AA	AA	AA	BB	BB	BB	BB	BB	AA	AA	BB	BB	AA	BB	AA	AA	AA	BB	BB	AA	AA	AA	AA	BB	AA	BB	-	BB	BB	AA	BB	AA	AA	BB	-
IWA6468	wsnp_Ku_c12562_20256747	[T/C]	AA	BB	AA	AA	BB	AA	BB	BB	-	AA	BB	AA	AA	AA	AA	BB	BB	BB	BB	BB	AA	AA	AA	BB	AA	BB	AA	AA	AA	BB	BB	AA	AA	AA	BB	BB	AA	BB	BB	BB	BB	AA	BB	BB	AA	BB	BB
IWA6480	wsnp_Ku_c13052_20918857	[A/C]	AA	BB	AA	AA	BB	AA	AA	BB	AA	-	BB	AA	BB	BB	AA	BB	-	BB	AA	AA	BB	AA	AA	-	BB	BB	BB	AA	AA	BB	BB	BB	BB	BB	BB	-	AA	AA	AA	AA	BB	BB	AA	-	AA	BB	BB
IWA6518	wsnp_Ku_c14220_22456455	[A/G]	AA	BB	BB	AA	BB	BB	BB	AA	BB	AA	BB	BB	AA	BB	AA	BB	AA	AA	BB	BB	AA	BB	AA	BB	BB	AA	AA	BB	BB	AA	AA	BB	BB	AA	AA	AA	BB	BB	AA	AA	BB	BB	AA	AA	BB	BB	BB
IWA6519	wsnp_Ku_c14220_22456923	[T/C]	AA	BB	BB	AA	BB	BB	BB	AA	BB	AA	BB	BB	AA	BB	AA	BB	AA	AA	BB	BB	AA	BB	AA	BB	BB	AA	AA	BB	BB	AA	AA	BB	BB	AA	AA	AA	BB	BB	AA	AA	BB	BB	AA	AA	BB	BB	BB
IWA6532	wsnp_Ku_c1455_2890228	[A/G]	AA	BB	AA	-	BB	BB	AA	AA	AA	BB	BB	AA	BB	BB	BB	AA	AA	AA	AA	BB	AA	BB	BB	AA	BB	BB	AA	BB	AA	AA	AA	AA	AA	AA	BB	AA	BB	AA	BB	BB	AA	BB	BB	BB	AA	AA	AA
IWA6543	wsnp_Ku_c14920_23377027	[T/C]	AA	BB	BB	BB	AA	AA	BB	-	BB	BB	AA	BB	BB	AA	BB	AA	BB	BB	AA	BB	BB	AA	BB	BB	AA	BB	BB	BB	BB	BB	AA	AA	AA	BB	AA	BB	BB	AA	AA	BB	BB	-	BB	AA	BB	BB	AA
IWA6553	wsnp_Ku_c15214_23756800	[T/C]	AA	BB	BB	AA	AA	AA	BB	BB	AA	AA	BB	AA	AA	BB	AA	AA	AA	BB	BB	BB	-	-	-	AA	AA	BB	BB	AA	BB	BB	AA	-	-	BB	BB	BB	AA	AA	AA	-	BB	AA	AA	AA	AA	BB	AA
IWA6587	wsnp_Ku_c1629_3206989	[A/C]	AA	BB	AA	BB	BB	AA	BB	BB	AA	AA	AA	BB	AA	AA	BB	AA	BB	BB	AA	AA	BB	AA	AA	AA	AA	AA	BB	BB	AA	AA	AA	BB	AA	BB	AA	AA	AA	-	-	AA	AA	BB	BB	AA	AA	AA	BB
IWA6644	wsnp_Ku_c1818_3557408	[T/C]	AA	BB	BB	BB	AA	AA	AA	AA	AA	AA	BB	BB	AA	AA	AA	BB	-	AA	AA	BB	AA	BB	BB	BB	BB	AA	BB	AA	AA	BB	AA	BB	AA	BB	BB	AA	BB	BB	BB	BB	BB	AA	AA	AA	AA	AA	AA
IWA6655	wsnp_Ku_c18538_27857915	[A/G]	AA	BB	-	BB	BB	BB	BB	-	BB	-	BB	AA	-	BB	BB	-	AA	BB	BB	AA	BB	BB	BB	AA	AA	AA	AA	BB	BB	AA	AA	BB	AA	BB	BB	AA	BB	AA	AA	BB	BB	BB	BB	BB	AA	AA	AA
IWA6709	wsnp_Ku_c21356_31093507	[A/G]	AA	BB	BB	AA	AA	BB	BB	BB	AA	AA	-	-	AA	BB	AA	AA	AA	BB	BB	BB	-	-	AA	AA	AA	BB	BB	AA	BB	BB	AA	BB	BB	BB	BB	BB	AA	AA	AA	-	BB	AA	-	AA	AA	BB	AA
IWA6745	wsnp_Ku_c23598_33524490	[A/C]	AA	BB	BB	AA	AA	BB	BB	BB	-	BB	AA	BB	BB	-	AA	AA	BB	-	BB	AA	AA	BB	AA	BB	BB	BB	BB	-	AA	BB	BB	BB	AA	BB	BB	AA	BB	AA	AA	-	BB	AA	BB	AA	BB	AA	AA
IWA6759	wsnp_Ku_c24391_34351602	[T/C]	AA	BB	AA	BB	BB	AA	AA	BB	BB	AA	AA	AA	BB	BB	BB	AA	BB	AA	BB	BB	BB	AA	BB	BB	AA	AA	BB	BB	BB	-	AA	BB	BB	BB	AA	AA	BB	AA	AA	AA	-	BB	AA	BB	AA	AA	BB
IWA6793	wsnp_Ku_c26257_36216869	[T/C]	AA	BB	BB	BB	BB	BB	BB	BB	-	-	BB	BB	BB	BB	BB	-	AA	BB	BB	AA	BB	BB	BB	AA	AA	AA	AA	BB	BB	BB	AA	BB	AA	BB	BB	AA	BB	BB	AA	BB	BB	BB	BB	BB	AA	AA	AA
IWA6836	wsnp_Ku_c28164_38103270	[A/G]	AA	BB	BB	AA	AA	AA	BB	AA	BB	AA	AA	AA	AA	BB	AA	BB	BB	BB	BB	AA	AA	AA	BB	AA	AA	BB	BB	AA	-	BB	AA	BB	AA	BB	BB	AA	AA	AA	AA	AA	AA	BB	AA	BB	AA	BB	BB
IWA6866	wsnp_Ku_c2958_5561339	[T/C]	AA	BB	AA	BB	BB	AA	BB	-	AA	BB	BB	-	BB	AA	AA	AA	BB	AA	AA	AA	BB	AA	AA	BB	BB	-	BB	AA	BB	AA	BB	BB	BB	AA	AA	AA	BB	BB	AA	BB	AA	AA	BB	AA	BB	BB	AA
IWA6891	wsnp_Ku_c30982_40765341	[T/C]	AA	BB	AA	AA	AA	AA	-	AA	-	AA	AA	AA	AA	BB	BB	AA	BB	BB	-	AA	AA	BB	BB	AA	AA	BB	BB	BB	AA	AA	AA	BB	AA	BB	BB	AA	AA	BB	BB	AA	AA	AA	AA	BB	AA	AA	BB
IWA6944	wsnp_Ku_c34883_44172415	[A/C]	AA	BB	BB	AA	BB	BB	AA	BB	BB	BB	BB	AA	BB	AA	-	AA	BB	AA	AA	BB	BB	BB	AA	AA	AA	AA	AA	AA	AA	AA	AA	BB	BB	AA	AA	-	AA	BB	BB	AA	BB	AA	BB	AA	-	BB	BB
IWA7052	wsnp_Ku_c4296_7807837	[A/G]	AA	BB	AA	AA	BB	AA	AA	AA	AA	BB	AA	AA	AA	AA	AA	BB	AA	BB	AA	AA	BB	AA	BB	AA	BB	AA	BB	AA	BB	BB	BB	AA	BB	AA	BB	AA	-	AA	BB	AA	AA	-	-	AA	BB	AA	BB
IWA7070	wsnp_Ku_c4446_8062906	[T/C]	AA	BB	AA	BB	BB	AA	AA	-	BB	AA	AA	AA	BB	BB	BB	AA	-	AA	BB	BB	-	AA	-	BB	AA	AA	-	BB	BB	-	AA	BB	BB	BB	AA	AA	BB	AA	AA	AA	-	BB	AA	-	AA	AA	BB
IWA7087	wsnp_Ku_c458_954940	[T/C]	AA	BB	AA	BB	BB	BB	BB	-	BB	BB	BB	BB	BB	AA	BB	-	BB	BB	AA	AA	BB	-	BB	AA	BB	AA	BB	BB	BB	-	BB	BB	AA	BB	BB	AA	BB	AA	AA	BB	BB	BB	-	AA	AA	AA	AA
IWA7092	wsnp_Ku_c46057_52907637	[A/C]	AA	BB	BB	AA	BB	BB	AA	BB	BB	BB	BB	AA	-	AA	-	AA	BB	AA	AA	-	BB	BB	AA	AA	AA	AA	AA	AA	AA	AA	AA	BB	BB	AA	AA	-	AA	BB	BB	AA	BB	AA	BB	AA	-	BB	BB
IWA7133	wsnp_Ku_c50991_56423564	[T/G]	AA	BB	BB	AA	BB	BB	AA	BB	BB	BB	BB	AA	-	AA	-	AA	BB	AA	AA	-	BB	BB	AA	AA	AA	AA	AA	AA	AA	AA	AA	BB	BB	AA	AA	-	AA	BB	BB	AA	BB	AA	BB	AA	-	BB	BB
IWA7185	wsnp_Ku_c5693_10079343	[T/C]	AA	BB	BB	BB	AA	BB	BB	BB	BB	AA	AA	BB	-	AA	AA	AA	BB	-	AA	AA	BB	BB	BB	AA	AA	BB	BB	BB	BB	BB	BB	AA	AA	AA	AA	BB	AA	BB	AA	BB	AA	AA	BB	AA	BB	AA	BB
IWA7196	wsnp_Ku_c5874_10384659	[A/G]	AA	BB	BB	AA	BB	BB	BB	AA	AA	AA	BB	BB	AA	BB	AA	BB	AA	AA	BB	BB	AA	BB	AA	BB	BB	AA	AA	BB	BB	AA	AA	BB	BB	AA	AA	AA	BB	BB	AA	AA	AA	BB	AA	AA	BB	AA	BB
IWA7227	wsnp_Ku_c6464_11320381	[T/C]	AA	BB	-	-	-	AA	BB	BB	-	-	BB	AA	AA	AA	AA	BB	BB	BB	BB	BB	AA	AA	BB	BB	AA	BB	AA	AA	AA	BB	BB	AA	AA	AA	AA	BB	AA	BB	BB	BB	BB	AA	BB	AA	AA	BB	BB
IWA7316	wsnp_Ku_c816_1684613	[A/C]	AA	BB	BB	AA	AA	BB	AA	BB	BB	BB	BB	BB	BB	AA	BB	BB	AA	BB	BB	BB	BB	AA	BB	BB	AA	AA	AA	BB	BB	AA	BB	AA	BB	BB	BB	BB	BB	BB	AA	BB	BB	BB	BB	BB	BB	-	-
IWA7407	wsnp_Ku_rep_c103889_90513365	[A/G]	AA	BB	BB	BB	BB	AA	BB	BB	BB	BB	AA	BB	AA	AA	AA	AA	BB	BB	AA	AA	BB	AA	BB	BB	BB	-	BB	BB	BB	AA	BB	AA	BB	AA	AA	BB	AA	BB	BB	BB	AA	AA	BB	AA	AA	BB	AA
IWA7521	wsnp_Ku_rep_c76865_75281903	[A/G]	AA	BB	BB	AA	BB	BB	AA	BB	BB	BB	BB	AA	-	BB	AA	AA	BB	AA	AA	-	BB	BB	AA	BB	AA	AA	AA	AA	AA	AA	BB	BB	BB	AA	AA	-	BB	BB	BB	BB	BB	AA	-	AA	BB	BB	BB
IWA7540	wsnp_Ra_c10658_17500498	[A/G]	AA	BB	AA	AA	AA	AA	-	AA	BB	BB	AA	BB	BB	BB	AA	AA	AA	BB	AA	BB	BB	AA	BB	BB	AA	BB	AA	BB	AA	AA	AA	-	BB	AA	BB	AA	AA	BB	BB	AA	BB	AA	AA	-	BB	BB	AA
IWA7595	wsnp_Ra_c12935_20587578	[A/G]	AA	BB	-	BB	BB	BB	BB	-	-	-	BB	-	-	BB	BB	-	AA	BB	BB	AA	BB	BB	BB	AA	AA	AA	AA	BB	BB	BB	AA	BB	AA	BB	BB	AA	BB	BB	AA	BB	BB	BB	BB	BB	AA	AA	AA
IWA7597	wsnp_Ra_c13_24576	[T/G]	AA	BB	BB	AA	BB	BB	BB	-	BB	-	AA	AA	AA	BB	AA	BB	BB	BB	AA	AA	BB	AA	AA	AA	-	AA	AA	BB	AA	BB	AA	BB	AA	AA	AA	AA	BB	BB	-	BB	AA	AA	AA	BB	AA	AA	BB
IWA7602	wsnp_Ra_c132_291198	[A/G]	AA	BB	-	AA	AA	AA	AA	BB	BB	AA	AA	BB	BB	AA	BB	BB	AA	AA	AA	AA	AA	-	AA	AA	BB	BB	BB	BB	AA	BB	AA	BB	BB	AA	AA	AA	AA	AA	BB	AA	BB	BB	BB	BB	AA	AA	BB
IWA7647	wsnp_Ra_c16264_24873670	[T/C]	AA	BB	AA	BB	BB	BB	AA	BB	BB	AA	BB	BB	AA	-	BB	AA	AA	BB	AA	AA	BB	BB	AA	AA	AA	AA	-	BB	BB	AA	AA	BB	AA	BB	AA	AA	AA	AA	-	BB	-	BB	BB	AA	AA	-	BB
IWA7728	wsnp_Ra_c2063_4012957	[T/C]	AA	BB	-	BB	AA	-	BB	-	-	AA	AA	BB	-	AA	AA	AA	BB	AA	AA	AA	BB	BB	BB	AA	AA	BB	BB	BB	BB	AA	AA	AA	AA	AA	AA	BB	AA	BB	AA	BB	AA	AA	-	AA	-	AA	-
IWA7732	wsnp_Ra_c20970_30293078	[A/C]	AA	BB	BB	BB	AA	-	BB	AA	BB	BB	AA	BB	AA	BB	AA	BB	BB	BB	-	BB	BB	BB	AA	-	AA	AA	AA	BB	AA	AA	BB	BB	AA	AA	AA	BB	AA	AA	AA	BB	BB	BB	BB	AA	AA	BB	AA
IWA7733	wsnp_Ra_c20970_30293227	[A/C]	AA	BB	BB	BB	AA	-	BB	AA	BB	BB	AA	BB	AA	BB	AA	BB	BB	BB	-	BB	BB	BB	AA	AA	AA	AA	AA	BB	AA	AA	BB	BB	AA	AA	AA	BB	AA	AA	AA	BB	BB	BB	BB	AA	AA	BB	AA
IWA7752	wsnp_Ra_c22026_31453420	[A/G]	AA	BB	AA	AA	BB	AA	AA	BB	-	-	BB	AA	BB	BB	AA	BB	-	BB	AA	-	BB	AA	-	-	BB	BB	BB	BB	AA	BB	BB	BB	BB	BB	BB	-	AA	AA	AA	AA	BB	BB	AA	-	AA	BB	BB
IWA7898	wsnp_Ra_c37745_45806931	[A/C]	AA	BB	BB	AA	AA	AA	BB	BB	AA	AA	-	AA	AA	BB	AA	AA	AA	BB	BB	BB	-	AA	AA	AA	AA	BB	BB	AA	BB	BB	AA	BB	BB	BB	BB	BB	AA	AA	AA	-	BB	AA	-	AA	AA	BB	AA
IWA7900	wsnp_Ra_c3790_6990678	[A/C]	AA	BB	AA	AA	BB	AA	AA	BB	-	-	BB	AA	BB	BB	AA	BB	-	BB	AA	-	BB	AA	-	-	BB	BB	BB	BB	AA	BB	BB	BB	BB	BB	BB	-	AA	AA	AA	AA	BB	BB	AA	-	AA	BB	BB
IWA7918	wsnp_Ra_c41135_48426638	[T/C]	AA	BB	AA	BB	BB	AA	BB	BB	AA	AA	AA	BB	AA	AA	BB	AA	BB	BB	AA	AA	BB	AA	AA	AA	AA	AA	BB	BB	AA	AA	AA	BB	AA	BB	AA	AA	AA	-	-	AA	AA	BB	BB	AA	AA	AA	BB
IWA7978	wsnp_Ra_c5008_8947135	[A/C]	AA	BB	BB	AA	BB	BB	BB	AA	AA	AA	BB	BB	AA	BB	AA	BB	AA	AA	BB	BB	AA	BB	AA	BB	BB	AA	AA	BB	BB	AA	AA	BB	BB	AA	AA	AA	BB	BB	AA	AA	AA	BB	AA	AA	BB	AA	BB
IWA7989	wsnp_Ra_c5212_9291784	[A/G]	AA	BB	BB	BB	AA	-	BB	AA	BB	BB	AA	BB	AA	BB	AA	BB	BB	BB	-	BB	BB	BB	AA	AA	AA	AA	AA	BB	AA	AA	BB	BB	AA	AA	AA	BB	AA	AA	AA	BB	BB	BB	BB	AA	AA	BB	AA
IWA8019	wsnp_Ra_c59050_60525086	[T/C]	AA	BB	AA	AA	BB	AA	AA	BB	-	-	BB	AA	BB	BB	AA	BB	-	BB	AA	-	BB	AA	-	-	BB	BB	BB	AA	AA	BB	BB	BB	BB	BB	BB	-	AA	AA	AA	AA	BB	BB	AA	-	AA	BB	BB
IWA8067	wsnp_Ra_c7615_13070849	[T/C]	AA	BB	AA	-	BB	BB	-	-	BB	BB	BB	BB	BB	AA	BB	-	-	-	AA	AA	-	-	-	AA	-	AA	-	BB	-	-	-	BB	AA	BB	-	AA	-	AA	AA	-	-	BB	-	AA	AA	AA	AA
IWA8105	wsnp_Ra_c9738_16173810	[T/G]	AA	BB	BB	AA	-	AA	AA	AA	AA	AA	AA	AA	AA	AA	AA	AA	BB	AA	BB	BB	BB	-	BB	BB	BB	BB	AA	BB	AA	AA	AA	AA	BB	AA	AA	AA	BB	BB	BB	BB	BB	AA	AA	BB	BB	BB	BB
IWA8108	wsnp_Ra_c9755_16200944	[A/G]	AA	BB	AA	AA	BB	AA	BB	BB	AA	BB	-	BB	BB	AA	AA	AA	BB	BB	BB	BB	BB	BB	AA	-	BB	BB	-	AA	BB	AA	BB	AA	BB	-	-	AA	-	AA	AA	AA	BB	BB	AA	BB	BB	BB	AA
IWA8111	wsnp_Ra_rep_c101899_87126448	[T/G]	AA	BB	AA	AA	BB	AA	AA	AA	-	AA	AA	AA	AA	BB	BB	AA	BB	AA	BB	AA	AA	BB	AA	BB	AA	BB	BB	BB	BB	AA	AA	BB	AA	BB	BB	AA	AA	BB	-	AA	AA	BB	AA	BB	AA	AA	BB
IWA8113	wsnp_Ra_rep_c104968_88985755	[A/G]	AA	BB	AA	BB	BB	AA	BB	-	AA	BB	BB	AA	BB	AA	AA	AA	BB	AA	AA	AA	BB	AA	AA	BB	BB	-	BB	AA	BB	AA	BB	BB	BB	AA	AA	AA	BB	BB	AA	BB	AA	AA	BB	AA	BB	BB	AA
IWA8138	wsnp_Ra_rep_c108473_91741819	[A/G]	AA	BB	BB	-	BB	AA	AA	BB	AA	AA	AA	AA	AA	AA	BB	AA	AA	AA	AA	AA	AA	BB	BB	BB	AA	BB	BB	AA	BB	AA	BB	AA	BB	AA	BB	AA	BB	AA	BB	BB	BB	BB	AA	BB	BB	BB	BB
IWA8154	wsnp_Ra_rep_c69221_66574148	[T/G]	AA	BB	AA	AA	BB	BB	BB	AA	BB	AA	AA	AA	AA	BB	AA	BB	BB	BB	AA	BB	BB	AA	AA	AA	BB	AA	AA	BB	AA	BB	AA	BB	AA	BB	AA	AA	BB	BB	AA	BB	AA	AA	AA	BB	AA	AA	BB
IWA8375	wsnp_RFL_Contig2726_2441798	[A/G]	AA	BB	BB	BB	BB	AA	BB	AA	BB	BB	AA	BB	AA	BB	AA	BB	BB	BB	BB	BB	BB	BB	AA	-	AA	AA	AA	-	AA	AA	BB	BB	AA	AA	-	AA	AA	AA	AA	AA	BB	BB	BB	AA	AA	BB	BB
IWA8377	wsnp_RFL_Contig2729_2446041	[A/G]	AA	BB	AA	AA	AA	AA	BB	AA	BB	BB	AA	BB	BB	BB	AA	AA	AA	BB	AA	BB	BB	AA	BB	BB	AA	BB	-	AA	AA	AA	AA	AA	BB	AA	BB	AA	AA	BB	BB	AA	BB	-	AA	-	BB	BB	AA
IWA8416	wsnp_RFL_Contig3024_2910610	[T/C]	AA	BB	BB	AA	BB	BB	AA	BB	BB	BB	BB	AA	-	AA	AA	AA	BB	AA	AA	-	BB	BB	AA	AA	AA	AA	AA	AA	AA	AA	AA	BB	BB	AA	AA	-	AA	BB	BB	AA	BB	AA	-	AA	AA	BB	BB
IWA8559	wsnp_RFL_Contig4086_4599222	[A/G]	AA	BB	BB	BB	AA	BB	AA	AA	AA	AA	AA	AA	AA	AA	BB	BB	BB	AA	AA	AA	BB	AA	AA	AA	BB	BB	AA	BB	AA	AA	AA	BB	BB	BB	AA	AA	BB	BB	BB	BB	BB	AA	BB	BB	BB	AA	BB
IWA846	wsnp_CAP11_rep_c4138_1957291	[A/G]	BB	AA	BB	AA	BB	AA	AA	AA	AA	AA	AA	BB	BB	AA	BB	BB	AA	BB	AA	BB	AA	AA	BB	AA	BB	AA	AA	AA	BB	AA	BB	AA	BB	BB	AA	AA	BB	AA	BB	BB	BB	BB	AA	AA	AA	BB	AA
IWA1046	wsnp_CAP7_c1735_859744	[T/C]	BB	AA	AA	AA	AA	BB	AA	AA	AA	BB	AA	BB	BB	BB	AA	-	BB	BB	AA	AA	AA	AA	AA	AA	BB	AA	BB	AA	AA	BB	AA	BB	BB	AA	BB	AA	AA	BB	AA	BB	AA	BB	BB	BB	BB	AA	AA
IWA1079	wsnp_CAP7_c3386_1586636	[T/C]	BB	AA	AA	BB	-	BB	AA	AA	AA	-	AA	BB	BB	BB	BB	AA	AA	AA	AA	AA	BB	AA	AA	AA	BB	AA	BB	BB	BB	AA	AA	BB	BB	BB	BB	AA	BB	AA	AA	AA	AA	BB	AA	BB	BB	AA	AA
IWA1098	wsnp_CAP7_c5823_2616381	[A/G]	BB	AA	AA	AA	BB	BB	AA	BB	AA	AA	BB	AA	AA	BB	AA	BB	AA	AA	BB	AA	AA	BB	AA	AA	BB	AA	BB	AA	BB	BB	BB	BB	BB	AA	BB	AA	AA	BB	BB	AA	AA	BB	AA	BB	AA	AA	BB
IWA1148	wsnp_CAP8_c1419_836050	[A/G]	BB	AA	BB	AA	AA	AA	AA	AA	AA	AA	AA	AA	AA	AA	AA	BB	AA	AA	BB	BB	AA	AA	AA	BB	AA	BB	AA	AA	AA	AA	BB	AA	BB	AA	AA	BB	AA	AA	BB	AA	AA	AA	AA	AA	BB	BB	BB
IWA1395	wsnp_Ex_c10843_17638629	[T/C]	BB	AA	AA	BB	BB	AA	BB	AA	AA	AA	AA	AA	AA	BB	AA	AA	BB	AA	AA	AA	AA	BB	AA	AA	BB	BB	BB	AA	AA	BB	AA	BB	AA	AA	AA	AA	AA	AA	BB	BB	AA	AA	BB	AA	AA	BB	BB
IWA1415	wsnp_Ex_c1097_2104146	[A/G]	BB	AA	AA	AA	BB	AA	AA	AA	AA	BB	BB	AA	BB	AA	BB	BB	AA	BB	BB	BB	BB	AA	AA	BB	AA	-	AA	AA	AA	AA	BB	BB	AA	AA	-	AA	AA	AA	AA	AA	-	BB	AA	AA	AA	BB	AA
IWA1433	wsnp_Ex_c11070_17950604	[A/G]	BB	AA	AA	AA	BB	AA	AA	BB	BB	BB	AA	AA	BB	AA	AA	AA	AA	AA	BB	AA	AA	AA	BB	BB	BB	BB	BB	BB	BB	BB	AA	AA	BB	BB	BB	AA	BB	BB	BB	AA	AA	AA	AA	AA	BB	AA	BB
IWA1441	wsnp_Ex_c11131_18036595	[T/G]	BB	AA	AA	AA	BB	AA	AA	BB	BB	BB	BB	AA	BB	AA	BB	AA	AA	AA	BB	AA	AA	AA	BB	BB	BB	BB	BB	BB	BB	BB	AA	AA	BB	BB	BB	AA	BB	BB	BB	AA	AA	AA	AA	BB	BB	AA	BB
IWA1443	wsnp_Ex_c11131_18037020	[T/G]	BB	AA	AA	AA	BB	AA	AA	BB	BB	BB	BB	AA	BB	AA	BB	AA	AA	AA	BB	-	AA	AA	BB	BB	BB	BB	BB	BB	BB	BB	AA	AA	BB	BB	BB	AA	BB	BB	BB	AA	AA	AA	AA	BB	BB	AA	BB
IWA1481	wsnp_Ex_c1137_2183772	[T/C]	BB	AA	AA	AA	BB	BB	BB	BB	BB	BB	AA	AA	AA	BB	BB	AA	BB	BB	BB	AA	BB	BB	AA	BB	AA	AA	AA	BB	BB	AA	AA	BB	AA	AA	AA	AA	AA	AA	AA	AA	AA	BB	AA	BB	BB	BB	AA
IWA1492	wsnp_Ex_c1143_2194680	[T/C]	BB	AA	BB	AA	AA	BB	BB	BB	AA	BB	BB	BB	AA	AA	AA	BB	BB	BB	AA	AA	BB	BB	BB	AA	BB	BB	BB	AA	AA	BB	BB	AA	AA	AA	BB	BB	AA	BB	BB	BB	BB	AA	BB	BB	BB	BB	AA
IWA1557	wsnp_Ex_c11939_19147421	[A/G]	BB	AA	AA	BB	BB	AA	BB	AA	AA	BB	AA	AA	BB	BB	AA	AA	BB	AA	AA	AA	AA	BB	BB	AA	BB	BB	BB	AA	AA	BB	AA	BB	AA	AA	BB	BB	AA	AA	BB	AA	AA	AA	AA	AA	AA	AA	AA
IWA1589	wsnp_Ex_c12141_19415226	[T/C]	BB	AA	BB	BB	AA	BB	AA	BB	BB	AA	BB	BB	BB	AA	BB	AA	BB	AA	BB	BB	AA	BB	AA	BB	AA	BB	AA	AA	AA	AA	AA	BB	AA	BB	AA	BB	BB	BB	AA	BB	AA	BB	BB	BB	AA	AA	AA
IWA1591	wsnp_Ex_c12152_19429932	[T/C]	BB	AA	AA	AA	BB	AA	AA	BB	BB	BB	BB	AA	BB	AA	BB	AA	AA	AA	BB	-	AA	AA	BB	BB	BB	BB	BB	BB	BB	BB	AA	AA	BB	BB	BB	AA	BB	BB	BB	AA	AA	AA	AA	BB	BB	AA	BB
IWA1615	wsnp_Ex_c12362_19720178	[T/G]	BB	AA	AA	BB	BB	AA	AA	AA	BB	BB	BB	BB	BB	BB	BB	BB	BB	AA	AA	AA	BB	BB	BB	BB	BB	AA	AA	BB	AA	AA	BB	AA	AA	AA	AA	AA	BB	BB	BB	BB	AA	BB	BB	BB	BB	AA	BB
IWA1824	wsnp_Ex_c1387_2659020	[A/G]	BB	AA	AA	BB	AA	AA	BB	AA	AA	AA	AA	BB	BB	BB	BB	BB	AA	BB	BB	BB	AA	AA	BB	BB	BB	BB	BB	BB	BB	BB	BB	AA	AA	BB	BB	BB	BB	AA	AA	BB	AA	BB	BB	BB	BB	AA	AA
IWA1828	wsnp_Ex_c13908_21774935	[T/C]	BB	AA	AA	BB	AA	BB	BB	AA	BB	BB	AA	AA	AA	BB	-	BB	BB	BB	AA	AA	-	AA	BB	AA	BB	BB	BB	AA	-	AA	BB	AA	BB	BB	AA	BB	AA	AA	BB	BB	AA	BB	BB	BB	BB	AA	AA
IWA1868	wsnp_Ex_c14156_22088799	[A/G]	BB	AA	AA	AA	BB	BB	AA	-	-	AA	BB	AA	AA	BB	-	BB	AA	AA	BB	AA	AA	BB	AA	AA	BB	AA	AA	AA	AA	AA	BB	BB	BB	AA	BB	AA	AA	BB	BB	AA	AA	AA	AA	BB	AA	AA	BB
IWA1981	wsnp_Ex_c15089_23270614	[T/C]	BB	AA	AA	-	AA	BB	AA	AA	BB	BB	AA	AA	AA	BB	BB	BB	BB	AA	AA	AA	BB	AA	BB	AA	BB	AA	AA	AA	AA	AA	BB	AA	BB	BB	AA	BB	AA	AA	BB	AA	BB	BB	BB	BB	AA	AA	BB
IWA2009	wsnp_Ex_c15341_23591761	[T/C]	BB	AA	AA	AA	AA	BB	AA	AA	BB	AA	AA	BB	BB	BB	BB	BB	AA	BB	BB	BB	BB	BB	BB	AA	AA	BB	AA	AA	AA	BB	AA	BB	AA	BB	BB	AA	AA	AA	AA	AA	BB	BB	AA	BB	AA	AA	BB
IWA2081	wsnp_Ex_c15985_24399118	[A/G]	BB	AA	AA	-	AA	BB	AA	AA	BB	BB	AA	AA	AA	-	BB	BB	BB	AA	AA	AA	BB	AA	BB	AA	BB	AA	AA	AA	AA	AA	BB	AA	BB	BB	AA	BB	AA	AA	BB	AA	-	BB	BB	BB	AA	AA	BB
IWA2182	wsnp_Ex_c16963_25554867	[T/G]	BB	AA	BB	BB	-	BB	AA	AA	-	BB	AA	BB	BB	BB	BB	AA	AA	AA	AA	AA	BB	BB	BB	AA	BB	AA	BB	BB	BB	AA	AA	BB	BB	BB	BB	AA	BB	AA	-	AA	AA	BB	AA	AA	BB	AA	AA
IWA2287	wsnp_Ex_c18169_26977013	[T/G]	BB	AA	AA	BB	BB	AA	AA	AA	BB	BB	-	BB	-	BB	BB	BB	BB	AA	AA	AA	AA	BB	BB	BB	BB	AA	AA	BB	AA	AA	BB	BB	AA	AA	AA	AA	AA	BB	AA	AA	AA	BB	-	AA	BB	AA	BB
IWA2292	wsnp_Ex_c18229_27041048	[A/G]	BB	AA	AA	BB	AA	AA	BB	AA	AA	AA	AA	BB	-	BB	-	BB	AA	BB	BB	-	AA	AA	BB	BB	BB	BB	BB	BB	BB	BB	BB	AA	AA	BB	BB	-	BB	AA	AA	BB	AA	BB	AA	BB	-	AA	AA
IWA2317	wsnp_Ex_c18499_27344859	[A/G]	BB	AA	AA	BB	BB	AA	BB	AA	AA	BB	AA	AA	BB	BB	AA	AA	BB	AA	AA	AA	AA	BB	-	AA	BB	BB	BB	AA	AA	BB	AA	BB	AA	AA	BB	BB	AA	AA	BB	AA	AA	AA	AA	AA	AA	AA	AA
IWA2329	wsnp_Ex_c18624_27492167	[A/G]	BB	AA	BB	AA	AA	AA	AA	BB	BB	BB	AA	BB	BB	AA	AA	BB	BB	AA	AA	BB	AA	AA	AA	BB	BB	BB	BB	AA	AA	AA	BB	AA	BB	AA	AA	BB	AA	AA	BB	AA	AA	AA	AA	AA	BB	BB	BB
IWA2459	wsnp_Ex_c19772_28771627	[T/C]	BB	AA	AA	BB	AA	BB	BB	BB	BB	AA	BB	AA	BB	BB	BB	BB	BB	BB	BB	BB	BB	AA	-	BB	BB	AA	BB	BB	BB	BB	AA	BB	BB	BB	AA	BB	AA	AA	BB	AA	AA	-	AA	BB	AA	BB	BB
IWA2556	wsnp_Ex_c20786_29874875	[A/C]	BB	AA	AA	AA	AA	AA	AA	AA	AA	BB	BB	AA	AA	BB	AA	BB	AA	BB	BB	AA	AA	AA	AA	AA	BB	AA	AA	AA	AA	AA	-	BB	BB	BB	AA	BB	AA	AA	BB	AA	AA	BB	-	BB	AA	AA	BB
IWA2557	wsnp_Ex_c20786_29875033	[T/C]	BB	AA	AA	AA	AA	AA	AA	AA	AA	BB	BB	AA	AA	BB	AA	BB	AA	BB	BB	AA	AA	AA	AA	AA	BB	AA	AA	AA	AA	AA	BB	BB	BB	BB	AA	BB	AA	AA	BB	AA	AA	BB	BB	BB	AA	AA	BB
IWA2635	wsnp_Ex_c21633_30782312	[T/C]	BB	AA	AA	AA	BB	BB	BB	BB	AA	-	BB	BB	BB	-	BB	BB	BB	BB	BB	BB	AA	AA	BB	BB	AA	AA	BB	BB	BB	AA	-	AA	BB	BB	BB	BB	AA	-	BB	-	AA	BB	BB	BB	AA	AA	BB
IWA2642	wsnp_Ex_c2171_4072995	[T/G]	BB	AA	AA	BB	AA	BB	BB	BB	BB	BB	AA	AA	AA	BB	BB	BB	BB	BB	BB	BB	AA	BB	BB	AA	BB	BB	AA	BB	BB	BB	BB	BB	BB	AA	AA	BB	BB	AA	BB	AA	BB	BB	BB	AA	BB	AA	BB
IWA2781	wsnp_Ex_c23130_32358433	[A/G]	BB	AA	AA	BB	AA	AA	BB	AA	AA	AA	AA	BB	BB	BB	BB	BB	AA	BB	BB	BB	AA	AA	BB	BB	BB	BB	BB	BB	BB	BB	BB	AA	AA	BB	BB	BB	BB	AA	AA	BB	AA	BB	BB	BB	BB	AA	AA
IWA2819	wsnp_Ex_c23598_32827681	[A/G]	BB	AA	AA	BB	BB	AA	BB	AA	AA	AA	AA	AA	AA	BB	AA	AA	BB	AA	AA	AA	AA	BB	AA	AA	BB	BB	BB	AA	AA	BB	AA	BB	AA	AA	AA	AA	AA	AA	BB	BB	AA	AA	BB	AA	AA	BB	BB
IWA2861	wsnp_Ex_c23992_33235984	[A/G]	BB	AA	AA	BB	BB	BB	AA	AA	BB	BB	-	BB	BB	AA	BB	BB	BB	AA	AA	AA	AA	BB	BB	BB	BB	AA	AA	BB	AA	AA	BB	AA	AA	AA	AA	AA	BB	BB	BB	AA	AA	BB	BB	BB	BB	AA	BB
IWA2970	wsnp_Ex_c25405_34671802	[T/G]	BB	AA	AA	AA	BB	BB	AA	-	-	AA	BB	AA	AA	BB	-	BB	AA	AA	BB	AA	AA	BB	AA	AA	BB	AA	AA	AA	AA	AA	BB	BB	BB	AA	BB	AA	AA	BB	BB	AA	AA	AA	AA	BB	AA	AA	BB
IWA3088	wsnp_Ex_c27088_36309449	[T/G]	BB	AA	AA	BB	AA	AA	BB	AA	AA	AA	AA	BB	BB	BB	BB	BB	AA	BB	BB	BB	AA	AA	BB	BB	BB	BB	BB	BB	BB	BB	BB	AA	AA	BB	BB	BB	BB	AA	AA	BB	AA	BB	BB	BB	BB	AA	AA
IWA3190	wsnp_Ex_c28827_37918346	[A/G]	BB	AA	BB	BB	AA	AA	AA	BB	AA	BB	BB	BB	BB	AA	BB	AA	AA	AA	BB	AA	AA	BB	BB	BB	AA	BB	BB	AA	BB	AA	BB	AA	BB	AA	BB	BB	AA	AA	BB	AA	BB	BB	BB	AA	BB	BB	AA
IWA3245	wsnp_Ex_c29631_38640100	[A/C]	BB	AA	AA	AA	AA	AA	AA	-	AA	-	AA	AA	AA	AA	AA	-	BB	AA	BB	BB	AA	-	AA	BB	BB	BB	BB	AA	AA	AA	BB	AA	BB	AA	AA	BB	AA	AA	BB	AA	AA	AA	AA	AA	BB	BB	BB
IWA3326	wsnp_Ex_c31249_40066886	[A/G]	BB	AA	AA	BB	AA	AA	BB	AA	AA	AA	AA	BB	-	BB	BB	BB	AA	BB	BB	-	AA	AA	BB	BB	BB	BB	BB	BB	BB	BB	BB	AA	AA	BB	BB	BB	BB	AA	AA	BB	AA	BB	-	BB	BB	AA	AA
IWA3361	wsnp_Ex_c3178_5868813	[T/C]	BB	AA	AA	BB	AA	AA	BB	AA	AA	AA	AA	BB	-	BB	BB	BB	AA	BB	BB	AA	AA	AA	BB	BB	BB	BB	BB	BB	BB	BB	BB	AA	AA	BB	BB	BB	BB	AA	AA	BB	AA	BB	AA	BB	BB	AA	AA
IWA3383	wsnp_Ex_c3227_5948436	[A/G]	BB	AA	AA	AA	AA	AA	AA	AA	AA	AA	AA	AA	AA	AA	AA	AA	BB	AA	AA	BB	AA	AA	AA	BB	BB	BB	BB	AA	AA	AA	BB	AA	BB	AA	AA	BB	AA	AA	BB	AA	AA	AA	AA	AA	BB	BB	BB
IWA3392	wsnp_Ex_c32467_41117359	[A/G]	BB	AA	BB	BB	AA	BB	BB	AA	-	-	AA	BB	AA	AA	BB	AA	-	AA	BB	-	AA	BB	-	-	AA	AA	AA	BB	BB	AA	AA	AA	AA	AA	AA	-	BB	BB	BB	BB	AA	AA	BB	-	BB	AA	AA
IWA3406	wsnp_Ex_c32590_41222878	[T/C]	BB	AA	AA	BB	BB	-	AA	AA	BB	BB	AA	BB	BB	AA	BB	BB	BB	AA	AA	AA	BB	BB	BB	AA	BB	AA	AA	BB	AA	AA	BB	BB	BB	BB	AA	AA	BB	BB	BB	AA	AA	BB	BB	BB	BB	AA	BB
IWA3479	wsnp_Ex_c34474_42777857	[T/C]	BB	AA	AA	AA	AA	BB	AA	AA	AA	AA	BB	AA	BB	AA	BB	AA	AA	AA	AA	AA	AA	AA	BB	BB	BB	BB	BB	BB	BB	BB	AA	AA	BB	BB	BB	AA	BB	BB	BB	AA	AA	AA	AA	BB	BB	AA	BB
IWA3507	wsnp_Ex_c3501_6407678	[A/G]	BB	AA	AA	BB	AA	BB	BB	AA	BB	BB	BB	BB	BB	BB	AA	BB	BB	BB	BB	BB	BB	AA	AA	AA	BB	AA	AA	BB	AA	BB	AA	BB	AA	BB	AA	BB	AA	BB	AA	AA	AA	AA	BB	AA	AA	AA	AA
IWA3551	wsnp_Ex_c35910_43971560	[T/C]	BB	AA	BB	BB	AA	BB	BB	AA	BB	BB	AA	BB	AA	AA	BB	AA	-	AA	BB	AA	AA	BB	BB	-	AA	AA	AA	AA	BB	AA	AA	AA	AA	AA	AA	-	BB	BB	BB	BB	AA	AA	BB	BB	BB	AA	AA
IWA3556	wsnp_Ex_c36049_44083089	[A/G]	BB	AA	AA	BB	BB	AA	AA	AA	AA	AA	BB	AA	AA	AA	BB	BB	AA	AA	AA	BB	BB	AA	BB	AA	AA	AA	AA	AA	AA	AA	AA	AA	BB	AA	AA	BB	AA	BB	BB	AA	AA	BB	AA	BB	AA	BB	BB
IWA3565	wsnp_Ex_c36141_44153175	[A/G]	BB	AA	AA	BB	AA	AA	BB	AA	AA	AA	AA	BB	BB	BB	BB	BB	AA	BB	BB	BB	AA	AA	BB	BB	BB	BB	BB	BB	BB	BB	BB	AA	AA	BB	BB	BB	BB	AA	AA	BB	AA	BB	-	BB	BB	AA	AA
IWA3582	wsnp_Ex_c3666_6687919	[T/C]	BB	AA	AA	BB	AA	AA	BB	AA	AA	AA	AA	BB	AA	BB	BB	BB	AA	BB	BB	AA	AA	AA	BB	BB	BB	BB	BB	BB	BB	BB	BB	AA	AA	BB	BB	-	BB	AA	AA	BB	AA	BB	AA	BB	BB	AA	AA
IWA3654	wsnp_Ex_c38704_46166494	[A/G]	BB	AA	BB	AA	AA	BB	BB	BB	AA	BB	AA	AA	AA	AA	BB	AA	BB	BB	BB	AA	AA	BB	BB	AA	AA	AA	AA	AA	BB	BB	AA	AA	AA	AA	AA	BB	AA	AA	BB	BB	AA	AA	BB	BB	BB	AA	BB
IWA3662	wsnp_Ex_c38981_46383475	[T/C]	BB	AA	AA	AA	AA	BB	AA	AA	BB	AA	AA	-	BB	BB	BB	BB	AA	BB	BB	BB	AA	BB	BB	AA	AA	-	AA	BB	AA	BB	AA	BB	AA	BB	BB	AA	AA	AA	AA	AA	BB	BB	AA	BB	AA	AA	BB
IWA3665	wsnp_Ex_c3906_7086162	[T/C]	BB	AA	AA	BB	BB	AA	AA	AA	BB	BB	-	BB	BB	BB	BB	BB	BB	AA	AA	AA	AA	BB	BB	BB	BB	AA	AA	BB	AA	AA	BB	BB	AA	AA	AA	AA	AA	BB	AA	AA	AA	BB	BB	AA	BB	AA	BB
IWA3737	wsnp_Ex_c40862_47826928	[A/C]	BB	AA	AA	AA	BB	AA	BB	AA	AA	BB	AA	AA	BB	AA	BB	BB	AA	AA	-	BB	AA	BB	BB	AA	BB	AA	AA	BB	BB	BB	AA	BB	-	BB	BB	BB	-	AA	BB	BB	BB	AA	AA	BB	AA	AA	BB
IWA3806	wsnp_Ex_c41969_48673442	[A/G]	BB	AA	AA	BB	BB	AA	AA	AA	BB	BB	-	BB	-	BB	BB	BB	BB	AA	AA	AA	AA	BB	BB	BB	BB	AA	AA	BB	AA	AA	BB	BB	AA	AA	AA	AA	AA	BB	AA	AA	AA	BB	BB	AA	BB	AA	BB
IWA3939	wsnp_Ex_c4548_8166555	[T/C]	BB	AA	AA	BB	BB	BB	BB	BB	BB	BB	BB	BB	BB	BB	BB	BB	AA	BB	AA	AA	AA	AA	AA	AA	AA	AA	BB	AA	BB	BB	BB	BB	AA	BB	BB	BB	AA	AA	AA	AA	AA	BB	BB	AA	AA	AA	AA
IWA3957	wsnp_Ex_c4605_8241260	[T/G]	BB	AA	AA	BB	BB	AA	AA	AA	BB	BB	-	BB	-	BB	BB	BB	BB	AA	AA	AA	AA	BB	BB	BB	BB	AA	AA	BB	AA	AA	BB	BB	AA	AA	AA	AA	AA	BB	AA	AA	AA	BB	BB	AA	BB	AA	BB
IWA4063	wsnp_Ex_c4996_8885500	[T/C]	BB	AA	BB	AA	AA	BB	AA	-	BB	AA	AA	-	AA	BB	BB	BB	AA	BB	BB	BB	AA	BB	BB	AA	AA	AA	AA	BB	AA	BB	AA	AA	AA	BB	BB	BB	AA	AA	BB	AA	BB	BB	AA	BB	AA	AA	BB
IWA4066	wsnp_Ex_c50074_54480272	[T/C]	BB	AA	AA	BB	BB	BB	BB	BB	BB	BB	BB	BB	BB	BB	BB	BB	AA	BB	AA	AA	AA	BB	AA	AA	AA	AA	-	AA	BB	BB	BB	BB	-	BB	BB	BB	AA	AA	AA	AA	AA	BB	BB	AA	AA	AA	AA
IWA4092	wsnp_Ex_c51115_55167855	[T/C]	BB	AA	AA	BB	AA	BB	BB	AA	BB	BB	BB	BB	BB	BB	AA	BB	BB	BB	BB	BB	BB	AA	AA	AA	BB	AA	AA	BB	AA	BB	AA	BB	AA	BB	AA	BB	AA	BB	AA	AA	AA	AA	BB	AA	AA	AA	AA
IWA4116	wsnp_Ex_c5192_9203100	[T/C]	BB	AA	AA	BB	BB	BB	AA	AA	BB	BB	BB	BB	BB	AA	BB	BB	BB	AA	AA	AA	BB	BB	BB	BB	BB	AA	AA	BB	AA	AA	BB	AA	AA	AA	AA	AA	BB	BB	BB	BB	AA	BB	BB	BB	BB	AA	BB
IWA4130	wsnp_Ex_c52268_55928053	[A/G]	BB	AA	AA	BB	AA	BB	BB	BB	BB	AA	BB	AA	BB	BB	BB	BB	BB	BB	BB	BB	BB	AA	AA	BB	BB	AA	BB	BB	BB	BB	AA	BB	BB	BB	AA	BB	AA	AA	BB	AA	AA	BB	AA	BB	AA	BB	BB
IWA4150	wsnp_Ex_c5268_9320618	[T/C]	BB	AA	BB	AA	AA	BB	BB	BB	BB	AA	AA	BB	AA	AA	BB	BB	BB	BB	BB	AA	BB	AA	AA	AA	AA	AA	BB	AA	AA	BB	BB	BB	BB	BB	BB	BB	AA	BB	AA	AA	AA	AA	AA	AA	AA	BB	BB
IWA4165	wsnp_Ex_c53281_56571602	[T/C]	BB	AA	AA	AA	BB	BB	AA	BB	-	AA	BB	AA	AA	BB	BB	BB	AA	AA	BB	AA	AA	BB	AA	AA	BB	AA	BB	AA	AA	AA	BB	BB	BB	AA	BB	AA	AA	BB	BB	AA	AA	BB	AA	BB	AA	AA	BB
IWA4175	wsnp_Ex_c53387_56639949	[A/G]	BB	AA	AA	AA	BB	AA	AA	AA	AA	BB	BB	AA	-	BB	BB	BB	AA	BB	BB	BB	AA	AA	AA	BB	BB	AA	AA	AA	AA	BB	BB	BB	BB	BB	BB	AA	BB	AA	BB	AA	BB	BB	AA	BB	AA	BB	AA
IWA4204	wsnp_Ex_c53976_57027796	[A/G]	BB	AA	BB	BB	AA	BB	BB	BB	-	BB	-	BB	BB	AA	AA	BB	AA	AA	AA	BB	BB	AA	AA	BB	BB	AA	AA	AA	BB	BB	BB	AA	BB	AA	AA	BB	BB	AA	-	BB	BB	AA	BB	AA	BB	BB	AA
IWA4234	wsnp_Ex_c5448_9619922	[A/G]	BB	AA	AA	AA	AA	BB	AA	AA	BB	AA	AA	-	BB	BB	BB	BB	AA	BB	BB	BB	AA	BB	BB	AA	AA	-	AA	BB	AA	BB	AA	BB	AA	BB	BB	AA	AA	AA	AA	AA	BB	BB	AA	BB	AA	AA	BB
IWA4238	wsnp_Ex_c54655_57455110	[A/C]	BB	AA	AA	BB	AA	AA	BB	AA	BB	AA	BB	BB	BB	AA	BB	AA	BB	AA	BB	BB	AA	AA	AA	AA	AA	BB	AA	AA	BB	AA	BB	AA	BB	BB	BB	BB	AA	AA	BB	AA	AA	BB	AA	BB	BB	AA	AA
IWA4310	wsnp_Ex_c5657_9942445	[T/C]	BB	AA	AA	AA	AA	AA	AA	AA	AA	AA	AA	BB	AA	AA	AA	-	BB	-	AA	BB	AA	AA	AA	BB	BB	BB	AA	AA	AA	BB	BB	AA	BB	AA	AA	BB	AA	BB	BB	AA	AA	AA	AA	AA	BB	AA	BB
IWA4421	wsnp_Ex_c6099_10674508	[A/G]	BB	AA	BB	BB	AA	AA	AA	AA	AA	AA	BB	AA	AA	BB	-	BB	-	BB	BB	AA	AA	AA	AA	AA	BB	AA	AA	AA	-	BB	AA	BB	BB	BB	AA	BB	AA	AA	AA	AA	BB	BB	-	BB	AA	AA	BB
IWA4456	wsnp_Ex_c62404_62055681	[A/G]	BB	AA	AA	AA	AA	AA	AA	AA	AA	BB	BB	AA	AA	BB	AA	BB	AA	BB	BB	AA	AA	AA	AA	AA	BB	AA	AA	AA	AA	AA	BB	BB	BB	BB	AA	BB	AA	AA	BB	AA	AA	BB	BB	BB	AA	AA	BB
IWA4492	wsnp_Ex_c63909_62932669	[T/C]	BB	AA	AA	AA	AA	BB	AA	AA	AA	AA	BB	AA	AA	BB	AA	AA	BB	BB	AA	AA	BB	AA	BB	AA	-	AA	AA	BB	BB	BB	AA	AA	BB	AA	BB	AA	BB	BB	AA	AA	AA	AA	BB	AA	BB	BB	-
IWA4493	wsnp_Ex_c63909_62932893	[A/G]	BB	AA	AA	AA	AA	BB	AA	AA	AA	AA	BB	AA	AA	BB	AA	AA	BB	BB	AA	AA	BB	AA	BB	AA	-	AA	AA	BB	BB	BB	AA	AA	BB	AA	BB	AA	BB	BB	AA	AA	AA	AA	BB	AA	BB	BB	AA
IWA4500	wsnp_Ex_c6401_11124462	[A/C]	BB	AA	AA	AA	AA	AA	BB	AA	AA	AA	BB	AA	AA	AA	AA	AA	AA	BB	AA	AA	AA	AA	AA	AA	AA	BB	AA	AA	AA	AA	AA	AA	AA	AA	AA	AA	BB	AA	AA	AA	BB	AA	AA	AA	AA	AA	AA
IWA4522	wsnp_Ex_c64848_63486322	[A/G]	BB	AA	AA	BB	AA	BB	BB	BB	AA	AA	AA	BB	AA	AA	BB	BB	BB	BB	BB	AA	BB	BB	AA	AA	AA	AA	BB	BB	AA	AA	BB	BB	AA	BB	BB	BB	AA	AA	AA	AA	AA	AA	AA	AA	AA	BB	AA
IWA4524	wsnp_Ex_c64882_63506752	[T/C]	BB	AA	AA	AA	BB	BB	BB	BB	BB	BB	AA	AA	BB	BB	BB	AA	-	BB	BB	AA	BB	AA	AA	AA	AA	BB	AA	BB	BB	AA	BB	AA	BB	AA	AA	BB	AA	AA	AA	AA	AA	BB	BB	BB	BB	BB	BB
IWA4531	wsnp_Ex_c6537_11338763	[T/C]	BB	AA	AA	-	AA	AA	AA	AA	AA	BB	BB	AA	AA	BB	-	BB	-	BB	BB	AA	AA	AA	AA	AA	BB	AA	AA	AA	AA	AA	BB	BB	BB	BB	AA	BB	AA	AA	BB	AA	AA	BB	BB	BB	AA	AA	BB
IWA4595	wsnp_Ex_c6961_12000176	[A/G]	BB	AA	AA	AA	BB	AA	AA	AA	AA	BB	BB	AA	AA	BB	BB	BB	AA	-	BB	BB	AA	AA	AA	BB	BB	AA	AA	AA	AA	AA	AA	BB	BB	BB	BB	AA	BB	AA	BB	AA	BB	BB	AA	BB	AA	BB	AA
IWA4657	wsnp_Ex_c7335_12579818	[T/C]	BB	AA	AA	BB	AA	AA	BB	AA	AA	BB	AA	BB	-	BB	-	BB	AA	AA	BB	-	-	AA	BB	BB	BB	BB	BB	BB	BB	BB	BB	AA	AA	BB	BB	BB	BB	AA	BB	BB	AA	BB	BB	BB	AA	AA	AA
IWA4658	wsnp_Ex_c73454_71499715	[T/C]	BB	AA	AA	AA	AA	BB	BB	AA	BB	BB	AA	AA	AA	AA	BB	BB	BB	AA	BB	BB	BB	AA	AA	BB	BB	BB	AA	BB	AA	BB	AA	AA	BB	AA	BB	BB	BB	AA	BB	AA	BB	AA	AA	BB	BB	BB	BB
IWA4725	wsnp_Ex_c7780_13254349	[T/C]	BB	AA	BB	AA	AA	BB	AA	AA	BB	BB	BB	AA	BB	BB	AA	BB	AA	AA	BB	BB	AA	BB	BB	BB	BB	BB	AA	AA	BB	BB	BB	AA	BB	AA	BB	BB	BB	-	BB	BB	BB	AA	AA	BB	BB	BB	AA
IWA4755	wsnp_Ex_c7967_13522958	[A/G]	BB	AA	AA	AA	AA	AA	AA	AA	AA	AA	AA	BB	-	AA	AA	-	BB	-	AA	BB	AA	AA	AA	BB	BB	BB	AA	AA	AA	BB	BB	AA	BB	AA	AA	BB	AA	BB	BB	AA	AA	AA	AA	AA	BB	AA	BB
IWA4781	wsnp_Ex_c8240_13914674	[A/G]	BB	AA	AA	BB	BB	BB	BB	BB	BB	BB	BB	BB	AA	BB	BB	BB	AA	BB	AA	-	AA	-	AA	AA	AA	AA	BB	AA	BB	BB	BB	BB	AA	BB	BB	BB	AA	AA	AA	AA	AA	BB	BB	AA	BB	AA	AA
IWA4790	wsnp_Ex_c831_1625061	[A/C]	BB	AA	BB	BB	BB	AA	AA	AA	BB	AA	AA	BB	BB	AA	BB	AA	BB	AA	-	AA	BB	-	BB	BB	AA	AA	BB	BB	BB	AA	AA	-	AA	BB	AA	AA	AA	AA	BB	BB	-	BB	-	AA	BB	AA	BB
IWA4803	wsnp_Ex_c8400_14157318	[T/C]	BB	AA	BB	-	AA	BB	BB	BB	BB	AA	AA	BB	AA	AA	BB	BB	BB	BB	BB	AA	BB	AA	AA	AA	AA	AA	BB	AA	AA	BB	BB	BB	BB	BB	BB	BB	AA	BB	AA	AA	AA	AA	AA	AA	AA	BB	BB
IWA4905	wsnp_Ex_c9377_15572157	[T/C]	BB	AA	-	BB	BB	AA	BB	BB	BB	BB	BB	BB	AA	BB	AA	AA	BB	BB	BB	BB	BB	AA	BB	BB	AA	AA	AA	BB	BB	BB	BB	BB	AA	BB	BB	BB	BB	BB	AA	AA	AA	BB	AA	AA	BB	BB	BB
IWA4962	wsnp_Ex_c9779_16145653	[T/C]	BB	AA	AA	AA	AA	AA	AA	BB	AA	BB	BB	BB	AA	AA	AA	BB	-	BB	AA	AA	AA	BB	-	BB	AA	BB	AA	AA	AA	-	BB	AA	AA	AA	AA	AA	AA	BB	BB	BB	AA	BB	BB	AA	BB	BB	AA
IWA4966	wsnp_Ex_c9813_16193536	[T/C]	BB	AA	AA	-	AA	BB	BB	AA	BB	BB	BB	BB	BB	BB	AA	BB	BB	BB	BB	BB	BB	AA	AA	AA	BB	AA	AA	BB	AA	BB	AA	BB	AA	BB	AA	BB	AA	BB	AA	AA	AA	AA	BB	AA	AA	AA	AA
IWA5009	wsnp_Ex_rep_c101414_86780813	[T/C]	BB	AA	AA	BB	BB	AA	AA	AA	BB	BB	-	BB	-	BB	BB	BB	BB	AA	AA	AA	AA	BB	BB	BB	BB	AA	AA	BB	AA	AA	BB	BB	AA	AA	AA	AA	AA	BB	AA	AA	AA	BB	BB	AA	BB	AA	BB
IWA5010	wsnp_Ex_rep_c101414_86780996	[A/G]	BB	AA	AA	BB	BB	AA	AA	AA	BB	BB	-	BB	-	BB	BB	BB	BB	AA	AA	AA	AA	BB	BB	BB	BB	AA	AA	BB	AA	AA	BB	BB	AA	AA	AA	AA	AA	BB	AA	AA	AA	BB	BB	AA	BB	AA	BB
IWA5015	wsnp_Ex_rep_c101457_86818160	[A/G]	BB	AA	-	BB	BB	AA	BB	AA	BB	BB	BB	AA	AA	BB	AA	AA	BB	BB	BB	BB	BB	BB	BB	BB	AA	AA	AA	BB	BB	BB	BB	AA	AA	BB	BB	BB	BB	BB	-	BB	AA	BB	AA	AA	BB	BB	AA
IWA5069	wsnp_Ex_rep_c102623_87746777	[T/C]	BB	AA	AA	BB	AA	AA	BB	AA	AA	AA	AA	BB	-	BB	BB	BB	AA	BB	BB	-	AA	AA	BB	BB	BB	BB	BB	BB	BB	BB	BB	AA	AA	BB	BB	BB	BB	AA	AA	BB	AA	BB	-	BB	BB	AA	AA
IWA5114	wsnp_Ex_rep_c104327_89077792	[A/G]	BB	AA	AA	BB	AA	AA	BB	AA	AA	AA	AA	AA	AA	BB	AA	AA	-	BB	AA	-	BB	-	BB	BB	BB	AA	BB	AA	BB	AA	BB	AA	BB	AA	BB	BB	BB	BB	AA	BB	BB	AA	BB	AA	AA	AA	-
IWA5141	wsnp_Ex_rep_c105551_89940311	[T/C]	BB	AA	AA	-	AA	BB	BB	AA	BB	BB	AA	AA	AA	BB	AA	BB	-	BB	AA	AA	-	AA	-	AA	BB	BB	BB	AA	AA	AA	BB	AA	BB	BB	AA	BB	AA	AA	BB	BB	AA	BB	BB	BB	BB	AA	AA
IWA5158	wsnp_Ex_rep_c107796_91279476	[A/G]	BB	AA	AA	BB	AA	BB	BB	AA	BB	BB	AA	BB	AA	BB	AA	BB	BB	BB	BB	BB	BB	AA	AA	AA	BB	AA	AA	BB	AA	BB	AA	BB	AA	AA	AA	BB	AA	BB	AA	AA	AA	BB	BB	AA	AA	AA	AA
IWA5279	wsnp_Ex_rep_c66651_64962429	[T/C]	BB	AA	BB	BB	-	BB	AA	AA	BB	BB	AA	BB	BB	BB	BB	AA	AA	AA	AA	AA	BB	BB	AA	AA	BB	AA	BB	BB	BB	AA	AA	BB	BB	BB	BB	AA	BB	AA	-	AA	AA	BB	AA	BB	BB	AA	-
IWA5289	wsnp_Ex_rep_c66696_65023462	[T/G]	BB	AA	BB	BB	BB	BB	AA	AA	BB	BB	AA	BB	BB	BB	BB	AA	AA	AA	AA	AA	BB	BB	AA	AA	BB	AA	BB	BB	BB	AA	AA	BB	BB	BB	BB	AA	BB	AA	BB	AA	AA	BB	AA	BB	BB	AA	-
IWA5309	wsnp_Ex_rep_c66839_65233112	[T/G]	BB	AA	AA	BB	AA	AA	BB	AA	AA	AA	AA	BB	-	BB	BB	BB	AA	BB	BB	-	AA	AA	BB	BB	BB	BB	BB	BB	BB	BB	BB	AA	AA	BB	BB	BB	BB	AA	AA	BB	AA	BB	AA	BB	BB	AA	AA
IWA5341	wsnp_Ex_rep_c66982_65424063	[T/C]	BB	AA	AA	BB	BB	AA	AA	AA	-	AA	BB	AA	AA	-	BB	BB	AA	-	AA	BB	BB	AA	BB	AA	AA	AA	AA	-	BB	AA	AA	AA	BB	AA	-	BB	AA	BB	BB	-	AA	BB	AA	BB	AA	BB	BB
IWA5370	wsnp_Ex_rep_c67198_65702998	[T/G]	BB	AA	AA	BB	BB	BB	-	BB	AA	BB	BB	BB	BB	AA	BB	AA	AA	AA	AA	BB	BB	BB	AA	BB	BB	AA	AA	BB	BB	AA	BB	AA	BB	AA	AA	BB	BB	BB	BB	BB	BB	AA	BB	AA	BB	AA	AA
IWA5506	wsnp_Ex_rep_c68173_66946365	[T/G]	BB	AA	AA	BB	AA	BB	BB	BB	BB	BB	AA	AA	AA	BB	-	BB	AA	BB	AA	BB	-	AA	BB	AA	BB	BB	BB	AA	BB	AA	-	AA	BB	BB	AA	BB	AA	AA	BB	BB	-	BB	BB	BB	BB	AA	AA
IWA5527	wsnp_Ex_rep_c68405_67220388	[T/C]	BB	AA	AA	AA	AA	BB	AA	AA	BB	AA	AA	-	BB	BB	BB	BB	AA	BB	BB	BB	AA	BB	BB	AA	AA	-	AA	BB	AA	BB	AA	BB	AA	BB	BB	AA	AA	AA	AA	AA	BB	BB	AA	BB	AA	AA	BB
IWA5560	wsnp_Ex_rep_c68704_67559626	[T/C]	BB	AA	AA	AA	AA	AA	AA	AA	AA	BB	BB	AA	AA	BB	AA	BB	AA	BB	BB	AA	AA	AA	AA	AA	BB	AA	AA	AA	AA	AA	-	BB	BB	BB	AA	BB	AA	AA	BB	AA	AA	BB	-	BB	AA	AA	BB
IWA5565	wsnp_Ex_rep_c68815_67687712	[A/G]	BB	AA	AA	-	AA	BB	BB	AA	BB	BB	BB	BB	BB	BB	AA	BB	BB	BB	BB	BB	BB	AA	AA	AA	BB	AA	AA	BB	AA	BB	AA	BB	AA	BB	AA	BB	AA	BB	AA	AA	AA	AA	BB	AA	AA	AA	AA
IWA5566	wsnp_Ex_rep_c68815_67688157	[A/G]	BB	AA	AA	-	AA	BB	BB	AA	BB	BB	BB	BB	BB	BB	AA	BB	BB	BB	BB	BB	BB	AA	AA	AA	BB	AA	AA	BB	AA	BB	AA	BB	AA	BB	AA	BB	AA	BB	AA	AA	AA	AA	BB	AA	AA	AA	AA
IWA5650	wsnp_Ex_rep_c69864_68824236	[T/C]	BB	AA	AA	BB	AA	AA	BB	AA	AA	BB	AA	AA	AA	BB	AA	AA	BB	BB	BB	BB	BB	BB	BB	AA	BB	AA	BB	AA	BB	BB	AA	AA	BB	AA	AA	BB	AA	AA	AA	BB	BB	-	BB	BB	-	AA	AA
IWA5688	wsnp_Ex_rep_c70343_69286072	[A/C]	BB	AA	AA	BB	AA	AA	AA	BB	AA	BB	BB	BB	BB	AA	BB	AA	AA	AA	BB	BB	AA	BB	BB	BB	BB	BB	BB	AA	BB	AA	BB	AA	BB	BB	BB	BB	AA	AA	BB	AA	BB	BB	BB	AA	BB	BB	AA
IWA5689	wsnp_Ex_rep_c70343_69286263	[T/C]	BB	AA	AA	BB	AA	AA	AA	BB	AA	BB	BB	BB	BB	AA	BB	AA	AA	AA	BB	BB	AA	BB	BB	BB	BB	BB	BB	AA	BB	AA	BB	AA	BB	BB	BB	BB	AA	AA	BB	AA	BB	BB	BB	AA	BB	BB	AA
IWA5770	wsnp_JD_c10233_10936535	[A/C]	BB	AA	AA	AA	AA	AA	AA	-	AA	-	AA	BB	-	AA	AA	-	BB	AA	AA	BB	AA	AA	AA	BB	BB	BB	BB	AA	AA	BB	BB	AA	BB	AA	AA	BB	AA	BB	BB	AA	AA	AA	AA	AA	BB	BB	BB
IWA5873	wsnp_JD_c1635_2290177	[A/C]	BB	AA	AA	AA	BB	AA	AA	AA	AA	BB	BB	AA	AA	BB	BB	BB	AA	-	AA	BB	AA	-	AA	BB	BB	AA	AA	AA	AA	BB	BB	BB	BB	BB	BB	AA	BB	AA	BB	AA	BB	BB	AA	BB	AA	BB	AA
IWA5893	wsnp_JD_c18695_17091254	[T/C]	BB	AA	BB	BB	AA	AA	AA	BB	AA	BB	BB	BB	BB	BB	AA	AA	BB	AA	BB	AA	AA	BB	AA	AA	AA	AA	BB	BB	BB	AA	BB	BB	AA	BB	BB	BB	AA	AA	AA	BB	AA	BB	AA	AA	AA	AA	BB
IWA5910	wsnp_JD_c20553_18260620	[A/G]	BB	AA	AA	BB	BB	AA	BB	AA	AA	BB	BB	AA	BB	BB	AA	AA	BB	AA	AA	BB	AA	BB	AA	AA	BB	AA	AA	BB	AA	AA	AA	BB	AA	AA	BB	AA	-	AA	BB	BB	AA	BB	AA	AA	BB	BB	BB
IWA5959	wsnp_JD_c2578_3489735	[A/G]	BB	AA	AA	BB	BB	AA	BB	BB	AA	AA	BB	AA	AA	AA	AA	BB	BB	AA	BB	AA	AA	AA	AA	BB	BB	BB	BB	BB	BB	BB	AA	AA	BB	BB	AA	BB	BB	BB	AA	-	AA	AA	AA	AA	BB	AA	AA
IWA5981	wsnp_JD_c29019_23208158	[A/G]	BB	AA	-	BB	BB	BB	BB	AA	AA	BB	BB	AA	AA	BB	AA	AA	BB	BB	BB	BB	BB	BB	BB	BB	AA	AA	AA	AA	BB	AA	BB	AA	AA	BB	BB	BB	BB	BB	AA	BB	AA	AA	AA	AA	BB	BB	AA
IWA6024	wsnp_JD_c37023_27225840	[T/C]	BB	AA	AA	AA	AA	-	AA	AA	AA	AA	BB	AA	BB	AA	BB	AA	AA	AA	AA	AA	AA	AA	BB	BB	BB	BB	BB	-	BB	BB	AA	AA	BB	BB	-	AA	BB	BB	BB	AA	AA	AA	AA	BB	BB	AA	BB
IWA6037	wsnp_JD_c3951_5018046	[T/C]	BB	AA	AA	AA	BB	-	BB	AA	-	BB	AA	-	BB	AA	BB	BB	AA	AA	-	BB	AA	BB	BB	AA	BB	AA	AA	BB	BB	BB	AA	BB	-	BB	BB	BB	-	AA	BB	BB	BB	AA	AA	BB	AA	AA	BB
IWA6053	wsnp_JD_c4372_5494161	[A/G]	BB	AA	AA	AA	BB	BB	AA	BB	BB	BB	AA	AA	BB	AA	AA	AA	AA	AA	BB	AA	AA	BB	BB	AA	AA	BB	BB	AA	BB	BB	AA	AA	BB	BB	BB	AA	BB	BB	BB	AA	AA	AA	AA	AA	BB	AA	BB
IWA6123	wsnp_JD_c6047_7211052	[T/C]	BB	AA	AA	BB	AA	AA	AA	BB	AA	BB	BB	BB	BB	AA	BB	AA	AA	AA	BB	BB	AA	BB	BB	BB	BB	BB	BB	AA	BB	AA	BB	AA	BB	BB	BB	BB	AA	AA	BB	AA	BB	BB	BB	AA	BB	BB	AA
IWA6148	wsnp_JD_c6562_7716133	[T/C]	BB	AA	-	AA	BB	AA	AA	BB	BB	BB	AA	AA	BB	AA	AA	AA	AA	AA	BB	-	AA	AA	BB	BB	BB	BB	BB	BB	BB	BB	AA	AA	BB	BB	BB	AA	BB	BB	BB	AA	AA	AA	AA	AA	BB	AA	BB
IWA6165	wsnp_JD_c7325_8422075	[A/G]	BB	AA	-	AA	AA	AA	AA	-	AA	-	AA	BB	-	AA	AA	-	BB	-	AA	BB	AA	AA	AA	BB	BB	BB	AA	AA	AA	BB	BB	AA	BB	AA	AA	BB	AA	BB	BB	AA	AA	AA	AA	AA	BB	AA	BB
IWA6217	wsnp_JD_c9290_10155594	[A/G]	BB	AA	AA	BB	BB	AA	BB	-	BB	BB	AA	BB	BB	BB	BB	BB	BB	AA	AA	AA	BB	AA	BB	BB	-	-	AA	BB	BB	AA	BB	BB	AA	AA	AA	AA	AA	AA	AA	BB	AA	BB	AA	AA	BB	AA	AA
IWA6263	wsnp_JD_rep_c49438_33652663	[A/G]	BB	AA	AA	AA	AA	BB	AA	BB	BB	BB	BB	BB	AA	BB	AA	AA	BB	BB	AA	AA	AA	AA	AA	BB	AA	AA	BB	BB	AA	AA	AA	-	AA	AA	AA	AA	BB	BB	BB	BB	AA	AA	BB	AA	BB	AA	BB
IWA6287	wsnp_JD_rep_c61843_39601402	[T/G]	BB	AA	BB	BB	AA	AA	AA	BB	AA	BB	BB	BB	BB	AA	BB	AA	AA	AA	BB	AA	AA	BB	BB	BB	AA	BB	BB	AA	BB	AA	BB	AA	BB	AA	BB	BB	AA	AA	BB	AA	BB	BB	BB	AA	BB	BB	AA
IWA6378	wsnp_Ku_c10239_16988077	[A/G]	BB	AA	AA	BB	BB	AA	AA	AA	BB	BB	-	BB	BB	BB	BB	BB	BB	AA	AA	AA	AA	BB	BB	BB	BB	AA	AA	BB	AA	AA	BB	AA	AA	AA	AA	AA	BB	BB	BB	AA	AA	BB	-	BB	BB	AA	BB
IWA6391	wsnp_Ku_c10418_17237935	[T/C]	BB	AA	AA	BB	BB	AA	AA	AA	-	AA	BB	AA	AA	-	BB	BB	AA	AA	AA	BB	BB	AA	BB	AA	AA	AA	AA	AA	BB	AA	AA	AA	BB	AA	AA	BB	AA	BB	BB	AA	AA	BB	AA	BB	AA	BB	BB
IWA6396	wsnp_Ku_c10468_17301216	[A/C]	BB	AA	AA	BB	BB	AA	BB	AA	BB	BB	BB	AA	AA	BB	AA	AA	BB	BB	BB	BB	BB	BB	BB	BB	AA	AA	AA	BB	BB	BB	BB	AA	AA	BB	BB	BB	BB	BB	AA	BB	AA	BB	AA	AA	BB	BB	AA
IWA6401	wsnp_Ku_c10572_17445600	[T/C]	BB	AA	BB	-	BB	BB	AA	AA	BB	AA	AA	BB	AA	BB	AA	-	BB	AA	BB	AA	BB	BB	AA	BB	AA	AA	AA	AA	BB	BB	-	AA	AA	BB	AA	BB	AA	BB	AA	AA	AA	BB	BB	AA	BB	AA	AA
IWA6465	wsnp_Ku_c12557_20249122	[T/C]	BB	AA	BB	AA	AA	BB	BB	BB	AA	BB	AA	AA	AA	AA	BB	AA	BB	BB	BB	AA	AA	BB	BB	AA	AA	AA	AA	AA	BB	BB	AA	AA	AA	AA	AA	BB	AA	-	BB	BB	AA	AA	BB	BB	BB	AA	BB
IWA6494	wsnp_Ku_c13325_21275440	[A/C]	BB	AA	AA	AA	AA	AA	BB	BB	AA	BB	BB	BB	AA	AA	AA	BB	AA	BB	AA	BB	AA	AA	AA	AA	AA	BB	AA	AA	AA	AA	AA	BB	AA	AA	AA	AA	BB	AA	BB	AA	BB	AA	BB	AA	BB	AA	AA
IWA6521	wsnp_Ku_c14252_22506286	[T/C]	BB	AA	BB	BB	BB	BB	AA	AA	AA	BB	AA	BB	BB	BB	BB	AA	AA	AA	AA	AA	BB	AA	AA	AA	BB	AA	BB	BB	BB	AA	AA	BB	BB	BB	BB	AA	BB	AA	BB	AA	AA	BB	AA	BB	BB	AA	-
IWA6589	wsnp_Ku_c16295_25149034	[T/G]	BB	AA	BB	AA	BB	BB	AA	AA	BB	AA	AA	BB	AA	AA	AA	BB	AA	AA	BB	AA	BB	AA	AA	BB	AA	AA	AA	AA	BB	BB	-	BB	AA	AA	BB	BB	AA	BB	AA	BB	AA	AA	AA	AA	BB	BB	AA
IWA6668	wsnp_Ku_c19112_28546731	[T/C]	BB	AA	BB	BB	AA	AA	AA	BB	BB	AA	BB	AA	BB	BB	AA	AA	AA	BB	BB	AA	AA	BB	BB	AA	AA	BB	AA	AA	BB	AA	BB	AA	AA	AA	AA	AA	AA	AA	AA	BB	BB	AA	AA	AA	BB	AA	-
IWA6671	wsnp_Ku_c19334_28808006	[A/G]	BB	AA	AA	AA	AA	BB	AA	AA	AA	AA	BB	AA	BB	AA	BB	AA	AA	AA	AA	AA	AA	AA	BB	BB	BB	BB	BB	-	BB	BB	AA	AA	BB	BB	BB	AA	BB	BB	BB	AA	AA	AA	AA	BB	BB	AA	BB
IWA6677	wsnp_Ku_c19631_29148397	[A/G]	BB	AA	-	AA	AA	AA	AA	-	-	-	AA	AA	-	AA	AA	-	BB	AA	AA	BB	AA	AA	AA	BB	BB	BB	BB	AA	AA	AA	BB	AA	BB	AA	AA	BB	AA	AA	BB	AA	AA	AA	AA	AA	BB	BB	BB
IWA6693	wsnp_Ku_c20866_30535750	[A/G]	BB	AA	AA	BB	BB	AA	AA	AA	AA	BB	AA	BB	BB	BB	BB	AA	-	AA	BB	BB	AA	AA	AA	BB	-	BB	AA	BB	BB	AA	-	AA	BB	BB	BB	BB	BB	-	BB	BB	AA	BB	BB	BB	AA	AA	BB
IWA6696	wsnp_Ku_c20949_30631810	[T/C]	BB	AA	AA	AA	BB	AA	AA	AA	AA	BB	BB	AA	BB	AA	BB	BB	AA	BB	BB	BB	BB	AA	AA	BB	AA	BB	AA	AA	AA	AA	BB	BB	AA	AA	-	AA	AA	-	AA	AA	AA	BB	AA	AA	AA	BB	AA
IWA6798	wsnp_Ku_c26323_36285697	[T/C]	BB	AA	AA	BB	BB	AA	-	BB	AA	BB	BB	-	AA	BB	AA	BB	BB	BB	BB	AA	BB	AA	AA	BB	BB	BB	BB	BB	BB	AA	AA	AA	BB	AA	BB	BB	BB	BB	AA	AA	AA	AA	BB	AA	BB	AA	AA
IWA6835	wsnp_Ku_c2815_5317230	[A/G]	BB	AA	AA	BB	BB	AA	AA	AA	BB	BB	-	BB	BB	BB	BB	BB	BB	AA	AA	AA	-	-	BB	BB	BB	AA	AA	BB	AA	AA	BB	AA	AA	AA	AA	AA	BB	BB	BB	-	AA	BB	-	BB	BB	AA	BB
IWA6837	wsnp_Ku_c28245_38183393	[A/G]	BB	AA	-	BB	BB	BB	AA	AA	BB	BB	AA	BB	BB	BB	BB	AA	AA	AA	AA	AA	BB	BB	AA	AA	BB	AA	BB	BB	BB	AA	AA	BB	BB	BB	BB	AA	BB	AA	-	AA	AA	BB	AA	BB	BB	AA	AA
IWA6838	wsnp_Ku_c28266_38201643	[A/G]	BB	AA	AA	AA	AA	BB	AA	AA	AA	BB	BB	AA	AA	BB	AA	BB	AA	BB	BB	AA	BB	AA	AA	AA	BB	AA	AA	AA	AA	AA	-	BB	BB	BB	AA	BB	AA	AA	BB	AA	AA	BB	-	BB	AA	AA	BB
IWA6869	wsnp_Ku_c3000_5638635	[A/G]	BB	AA	AA	-	AA	BB	BB	AA	BB	BB	AA	AA	AA	BB	-	BB	-	BB	AA	AA	-	AA	-	AA	BB	BB	BB	AA	AA	AA	BB	AA	BB	BB	AA	BB	AA	AA	BB	AA	-	BB	BB	BB	BB	AA	AA
IWA6901	wsnp_Ku_c31419_41152151	[A/G]	BB	AA	AA	-	AA	BB	BB	AA	BB	BB	BB	BB	BB	BB	AA	BB	BB	BB	BB	BB	BB	AA	AA	AA	BB	AA	AA	BB	AA	BB	AA	BB	AA	BB	AA	BB	AA	BB	AA	AA	AA	AA	BB	AA	AA	AA	AA
IWA6917	wsnp_Ku_c33028_42580216	[A/G]	BB	AA	BB	BB	AA	BB	BB	BB	BB	BB	BB	BB	BB	AA	AA	BB	AA	AA	AA	BB	BB	AA	AA	BB	BB	AA	AA	AA	BB	BB	BB	AA	BB	AA	AA	BB	BB	AA	BB	BB	BB	AA	BB	AA	BB	BB	AA
IWA6963	wsnp_Ku_c3688_6797159	[T/C]	BB	AA	AA	AA	AA	BB	AA	AA	AA	AA	BB	AA	AA	BB	AA	AA	BB	BB	AA	AA	BB	AA	BB	AA	-	AA	AA	BB	BB	BB	AA	AA	BB	AA	BB	AA	BB	BB	AA	AA	AA	AA	-	AA	BB	BB	AA
IWA6992	wsnp_Ku_c3869_7094615	[T/G]	BB	AA	-	BB	-	BB	AA	AA	BB	-	AA	BB	BB	BB	BB	AA	AA	AA	AA	AA	BB	BB	AA	AA	BB	AA	BB	BB	BB	AA	AA	BB	BB	BB	BB	AA	BB	AA	-	AA	AA	BB	AA	BB	BB	AA	AA
IWA7014	wsnp_Ku_c3973_7261765	[A/G]	BB	AA	AA	AA	BB	AA	BB	AA	BB	AA	BB	BB	BB	-	AA	AA	AA	AA	BB	BB	AA	AA	-	AA	AA	AA	BB	AA	BB	AA	BB	AA	BB	BB	BB	AA	BB	AA	BB	AA	AA	BB	BB	BB	BB	AA	AA
IWA7051	wsnp_Ku_c42925_50551343	[T/C]	BB	AA	AA	BB	BB	BB	BB	BB	AA	BB	BB	BB	BB	AA	BB	AA	AA	AA	AA	BB	BB	BB	AA	BB	BB	AA	AA	BB	BB	AA	BB	AA	BB	AA	AA	BB	BB	BB	BB	BB	BB	AA	BB	AA	BB	AA	AA
IWA7105	wsnp_Ku_c47983_54292296	[T/C]	BB	AA	AA	AA	BB	BB	AA	AA	BB	BB	AA	BB	AA	BB	AA	AA	BB	AA	BB	AA	BB	BB	AA	AA	AA	AA	AA	BB	BB	BB	AA	BB	AA	AA	AA	BB	AA	BB	AA	AA	AA	BB	BB	AA	AA	AA	AA
IWA7109	wsnp_Ku_c48254_54492007	[T/C]	BB	AA	-	BB	-	BB	AA	AA	AA	-	AA	BB	BB	BB	BB	AA	AA	AA	AA	AA	BB	AA	AA	AA	BB	AA	BB	BB	BB	AA	AA	BB	BB	BB	BB	AA	BB	AA	AA	AA	AA	BB	AA	BB	BB	AA	AA
IWA7126	wsnp_Ku_c5033_8989455	[T/C]	BB	AA	AA	AA	BB	AA	AA	AA	AA	BB	BB	AA	BB	AA	BB	BB	AA	BB	BB	BB	BB	AA	AA	BB	AA	-	AA	AA	AA	AA	BB	BB	AA	AA	AA	AA	AA	AA	AA	AA	-	BB	AA	AA	AA	BB	AA
IWA7221	wsnp_Ku_c6387_11197393	[T/C]	BB	AA	BB	AA	AA	AA	AA	BB	AA	AA	AA	AA	AA	BB	AA	BB	AA	AA	BB	BB	AA	-	AA	BB	AA	BB	AA	AA	AA	-	AA	AA	BB	AA	AA	BB	AA	BB	BB	AA	AA	AA	-	BB	BB	BB	BB
IWA7246	wsnp_Ku_c6800_11820558	[A/G]	BB	AA	BB	BB	AA	AA	AA	AA	AA	AA	AA	AA	BB	AA	BB	AA	BB	BB	AA	AA	AA	AA	BB	AA	AA	BB	BB	AA	BB	BB	AA	BB	AA	BB	BB	BB	BB	AA	BB	BB	BB	AA	AA	BB	AA	AA	AA
IWA7282	wsnp_Ku_c7413_12771109	[A/G]	BB	AA	AA	AA	BB	-	BB	AA	-	BB	AA	-	BB	AA	BB	BB	AA	AA	-	BB	AA	BB	BB	AA	BB	AA	AA	BB	BB	BB	AA	BB	-	BB	BB	BB	-	AA	BB	BB	BB	AA	AA	BB	AA	AA	BB
IWA7297	wsnp_Ku_c7811_13387117	[T/C]	BB	AA	AA	BB	BB	AA	BB	-	BB	BB	BB	BB	AA	BB	AA	AA	BB	BB	BB	-	BB	AA	BB	BB	AA	AA	AA	BB	BB	BB	BB	BB	AA	BB	BB	BB	BB	BB	AA	AA	AA	BB	AA	AA	BB	BB	BB
IWA7315	wsnp_Ku_c816_1684354	[T/C]	BB	AA	AA	BB	BB	AA	BB	AA	AA	AA	AA	AA	AA	BB	AA	AA	BB	AA	AA	AA	AA	BB	AA	AA	BB	BB	BB	AA	AA	BB	AA	BB	AA	AA	AA	AA	AA	AA	BB	AA	AA	AA	AA	AA	AA	-	BB
IWA7494	wsnp_Ku_rep_c71565_71299655	[T/C]	BB	AA	AA	AA	BB	AA	AA	BB	BB	BB	AA	AA	BB	AA	AA	AA	AA	AA	-	AA	AA	AA	BB	-	BB	BB	BB	BB	BB	BB	AA	AA	BB	BB	BB	AA	BB	BB	BB	AA	AA	AA	AA	AA	BB	AA	BB
IWA7522	wsnp_Ku_rep_c77171_75478137	[A/G]	BB	AA	AA	BB	AA	AA	BB	AA	AA	AA	AA	BB	AA	BB	-	BB	AA	BB	BB	AA	AA	AA	BB	BB	BB	BB	BB	BB	BB	BB	BB	AA	AA	BB	BB	-	BB	AA	AA	BB	AA	BB	AA	BB	-	AA	AA
IWA7539	wsnp_Ra_c10658_17500389	[T/C]	BB	AA	BB	BB	BB	BB	-	BB	AA	AA	BB	AA	AA	AA	BB	BB	BB	AA	BB	AA	AA	BB	AA	AA	BB	AA	BB	AA	BB	BB	BB	-	AA	BB	AA	BB	BB	AA	AA	BB	AA	BB	BB	-	AA	AA	BB
IWA7621	wsnp_Ra_c13998_21994095	[A/G]	BB	AA	AA	AA	BB	BB	AA	BB	-	AA	BB	AA	AA	BB	BB	BB	AA	AA	BB	AA	AA	BB	AA	AA	BB	AA	AA	AA	AA	AA	BB	BB	BB	AA	BB	AA	AA	BB	BB	AA	AA	-	AA	BB	AA	AA	BB
IWA7630	wsnp_Ra_c14711_22960624	[T/C]	BB	AA	AA	AA	AA	BB	BB	AA	BB	BB	AA	AA	AA	AA	BB	BB	BB	AA	BB	BB	BB	AA	AA	BB	BB	BB	AA	BB	AA	BB	AA	AA	BB	AA	AA	BB	BB	AA	BB	AA	BB	AA	AA	BB	BB	BB	BB
IWA7703	wsnp_Ra_c19335_28504388	[T/G]	BB	AA	AA	BB	BB	BB	BB	BB	-	BB	BB	BB	BB	AA	BB	BB	AA	AA	-	BB	BB	BB	AA	BB	BB	AA	AA	AA	BB	BB	BB	AA	BB	AA	AA	AA	BB	AA	AA	BB	BB	AA	BB	AA	BB	AA	AA
IWA7766	wsnp_Ra_c22777_32275954	[A/G]	BB	AA	BB	AA	AA	BB	BB	BB	AA	BB	BB	AA	AA	AA	AA	AA	BB	BB	-	AA	AA	BB	BB	AA	AA	AA	BB	AA	BB	BB	AA	AA	AA	AA	AA	BB	AA	AA	BB	AA	AA	AA	BB	BB	-	AA	AA
IWA7788	wsnp_Ra_c25590_35157004	[A/G]	BB	AA	BB	BB	AA	BB	BB	BB	-	BB	-	BB	BB	AA	AA	BB	AA	AA	AA	BB	BB	AA	AA	AA	BB	AA	AA	AA	BB	BB	BB	AA	BB	AA	AA	BB	BB	AA	-	BB	BB	AA	BB	AA	BB	BB	AA
IWA7795	wsnp_Ra_c26091_35652620	[T/C]	BB	AA	BB	BB	AA	BB	AA	AA	-	BB	AA	BB	BB	BB	BB	AA	AA	AA	AA	AA	BB	BB	BB	AA	BB	AA	BB	BB	BB	AA	AA	BB	BB	BB	AA	AA	BB	AA	-	AA	AA	BB	AA	AA	BB	AA	AA
IWA7805	wsnp_Ra_c2711_5148302	[T/C]	BB	AA	BB	BB	AA	BB	BB	AA	-	-	AA	BB	AA	AA	BB	AA	-	AA	BB	-	AA	BB	-	-	AA	AA	AA	BB	BB	AA	AA	AA	AA	AA	AA	-	BB	BB	BB	BB	AA	AA	BB	-	BB	AA	AA
IWA7857	wsnp_Ra_c31894_40964279	[T/G]	BB	AA	-	-	-	BB	AA	AA	AA	-	AA	BB	BB	BB	BB	AA	AA	AA	AA	AA	BB	BB	AA	AA	BB	AA	BB	BB	BB	AA	AA	BB	BB	BB	BB	AA	BB	AA	-	AA	AA	BB	AA	BB	BB	AA	AA
IWA7860	wsnp_Ra_c32055_41111615	[A/G]	BB	AA	AA	AA	AA	AA	AA	-	AA	-	AA	BB	-	AA	AA	-	BB	-	AA	BB	AA	AA	AA	BB	BB	BB	AA	AA	AA	BB	BB	AA	BB	AA	AA	BB	AA	BB	BB	AA	AA	AA	AA	AA	BB	AA	BB
IWA7880	wsnp_Ra_c34269_43004949	[T/G]	BB	AA	AA	BB	AA	BB	AA	BB	BB	AA	AA	AA	AA	BB	BB	BB	BB	AA	BB	AA	AA	BB	BB	AA	BB	AA	AA	BB	BB	AA	BB	BB	BB	AA	AA	BB	AA	AA	BB	AA	BB	BB	BB	AA	AA	AA	BB
IWA7916	wsnp_Ra_c407_862316	[T/C]	BB	AA	BB	BB	AA	AA	AA	AA	AA	AA	BB	AA	AA	BB	BB	BB	AA	BB	BB	AA	AA	AA	AA	AA	BB	AA	AA	AA	AA	BB	AA	BB	BB	BB	AA	BB	AA	AA	AA	AA	AA	BB	-	BB	AA	AA	BB
IWA7955	wsnp_Ra_c4660_8405634	[T/G]	BB	AA	AA	BB	AA	BB	BB	BB	BB	AA	BB	AA	BB	BB	BB	BB	BB	BB	BB	BB	BB	AA	-	-	BB	AA	BB	BB	BB	BB	AA	BB	BB	BB	AA	BB	AA	AA	BB	AA	-	-	AA	BB	AA	BB	BB
IWA7982	wsnp_Ra_c5088_9081927	[T/C]	BB	AA	BB	BB	AA	BB	BB	BB	-	BB	-	BB	BB	AA	AA	BB	AA	AA	AA	BB	BB	AA	AA	BB	BB	AA	AA	AA	BB	BB	BB	AA	BB	AA	AA	BB	BB	AA	-	BB	BB	AA	BB	AA	BB	BB	AA
IWA8030	wsnp_Ra_c6251_10944998	[T/C]	BB	AA	BB	-	BB	BB	AA	AA	BB	AA	AA	BB	AA	BB	AA	-	AA	AA	BB	AA	BB	AA	AA	BB	AA	AA	AA	AA	BB	BB	-	AA	AA	BB	AA	BB	AA	BB	AA	AA	AA	BB	BB	AA	BB	BB	AA
IWA8063	wsnp_Ra_c744_1535534	[T/C]	BB	AA	AA	BB	AA	AA	BB	AA	AA	BB	AA	AA	AA	BB	AA	AA	BB	BB	BB	BB	BB	BB	BB	AA	BB	AA	BB	AA	BB	BB	AA	AA	BB	AA	AA	BB	AA	AA	AA	BB	BB	-	BB	BB	-	AA	AA
IWA8077	wsnp_Ra_c8394_14242442	[T/G]	BB	AA	AA	AA	AA	BB	AA	AA	BB	AA	BB	-	BB	BB	BB	BB	AA	BB	BB	BB	BB	BB	BB	AA	AA	BB	AA	AA	AA	BB	AA	BB	AA	BB	BB	AA	BB	AA	AA	AA	BB	BB	AA	BB	AA	AA	BB
IWA8083	wsnp_Ra_c8489_14382125	[T/C]	BB	AA	-	BB	AA	AA	AA	AA	AA	AA	BB	AA	AA	BB	-	BB	-	BB	BB	AA	AA	AA	AA	AA	BB	AA	AA	AA	-	BB	AA	BB	BB	BB	AA	BB	AA	AA	AA	AA	BB	BB	-	BB	AA	AA	BB
IWA8099	wsnp_Ra_c9185_15386027	[T/C]	BB	AA	BB	AA	AA	BB	AA	AA	BB	BB	BB	AA	BB	BB	AA	BB	BB	AA	BB	BB	AA	AA	BB	BB	BB	BB	AA	AA	AA	BB	BB	AA	BB	AA	BB	BB	BB	BB	BB	BB	BB	AA	AA	BB	BB	BB	AA
IWA8140	wsnp_Ra_rep_c109424_92389329	[A/C]	BB	AA	BB	BB	BB	BB	AA	AA	BB	AA	AA	-	-	AA	BB	BB	BB	AA	BB	AA	AA	BB	AA	BB	AA	AA	AA	BB	AA	AA	BB	BB	BB	AA	AA	BB	AA	BB	BB	BB	BB	BB	BB	BB	BB	BB	AA
IWA8155	wsnp_Ra_rep_c69221_66574260	[T/G]	BB	AA	BB	BB	AA	AA	AA	BB	AA	BB	BB	BB	BB	AA	BB	AA	AA	AA	BB	AA	AA	BB	BB	BB	AA	BB	BB	AA	BB	AA	BB	AA	BB	AA	BB	BB	AA	AA	BB	AA	BB	BB	BB	AA	BB	BB	AA
IWA8165	wsnp_Ra_rep_c69821_67403173	[T/C]	BB	AA	AA	AA	AA	AA	BB	AA	AA	AA	AA	AA	AA	AA	AA	AA	AA	BB	AA	AA	AA	AA	AA	AA	AA	-	AA	AA	AA	AA	AA	AA	AA	AA	AA	AA	BB	AA	AA	AA	BB	AA	AA	AA	-	AA	AA
IWA8204	wsnp_Ra_rep_c76185_73456819	[A/G]	BB	AA	BB	AA	AA	BB	BB	BB	BB	AA	AA	BB	AA	AA	BB	BB	BB	BB	BB	AA	BB	AA	AA	AA	AA	AA	BB	AA	AA	BB	BB	BB	BB	BB	BB	BB	AA	BB	AA	AA	AA	AA	AA	AA	AA	BB	BB
IWA8261	wsnp_RFL_Contig1836_982013	[T/C]	BB	AA	AA	-	AA	BB	BB	AA	BB	BB	AA	AA	AA	BB	AA	BB	-	BB	AA	AA	-	AA	-	AA	BB	BB	BB	AA	AA	AA	BB	AA	BB	BB	AA	BB	AA	AA	BB	BB	AA	BB	BB	BB	BB	AA	AA
IWA8303	wsnp_RFL_Contig2177_1500201	[T/C]	BB	AA	BB	AA	AA	-	BB	AA	AA	BB	AA	AA	-	BB	AA	BB	BB	AA	BB	BB	AA	AA	BB	BB	BB	BB	BB	AA	AA	BB	BB	AA	BB	AA	BB	BB	BB	BB	-	AA	BB	AA	AA	AA	BB	BB	AA
IWA8326	wsnp_RFL_Contig2338_1839077	[A/G]	BB	AA	-	AA	AA	AA	AA	-	AA	-	AA	BB	-	AA	AA	-	BB	-	AA	BB	AA	AA	AA	BB	BB	BB	AA	AA	AA	BB	BB	AA	BB	AA	AA	BB	AA	BB	BB	AA	AA	AA	AA	AA	BB	AA	BB
IWA8354	wsnp_RFL_Contig2569_2199100	[T/C]	BB	AA	BB	-	AA	AA	AA	-	AA	AA	AA	AA	-	BB	AA	AA	AA	AA	BB	BB	-	BB	AA	BB	-	AA	AA	BB	AA	BB	BB	AA	BB	BB	BB	BB	AA	AA	BB	AA	BB	AA	BB	BB	BB	BB	BB
IWA8356	wsnp_RFL_Contig259_2235190	[A/G]	BB	AA	BB	BB	AA	BB	AA	BB	BB	BB	AA	BB	AA	AA	BB	BB	AA	AA	BB	BB	AA	AA	AA	BB	BB	BB	AA	AA	BB	BB	BB	BB	BB	AA	BB	BB	-	AA	BB	BB	BB	BB	AA	AA	BB	BB	BB
IWA8395	wsnp_RFL_Contig2809_2587619	[T/C]	BB	AA	AA	AA	BB	-	AA	AA	AA	AA	BB	AA	BB	AA	BB	AA	AA	AA	BB	AA	AA	AA	BB	BB	BB	BB	BB	-	BB	BB	AA	AA	BB	BB	BB	AA	BB	BB	BB	AA	BB	AA	AA	BB	BB	AA	BB
IWA8423	wsnp_RFL_Contig308_2996797	[T/C]	BB	AA	AA	BB	AA	AA	AA	BB	AA	BB	AA	AA	BB	AA	BB	AA	BB	BB	AA	AA	BB	AA	BB	AA	AA	BB	BB	AA	AA	BB	BB	AA	AA	BB	BB	BB	AA	AA	BB	BB	AA	AA	BB	BB	AA	AA	AA
IWA8587	wsnp_RFL_Contig4398_5146811	[A/G]	BB	AA	AA	BB	-	BB	BB	BB	-	BB	BB	BB	BB	BB	BB	BB	AA	BB	AA	AA	AA	-	AA	AA	AA	AA	-	AA	BB	BB	BB	BB	-	BB	BB	BB	AA	AA	AA	AA	AA	BB	BB	AA	AA	AA	AA
IWA50	wsnp_BE404601B_Ta_2_1	[T/G]	BB	AA	AA	-	AA	BB	AA	AA	BB	BB	AA	AA	AA	BB	-	BB	-	BB	BB	AA	BB	AA	AA	AA	BB	AA	AA	AA	-	AA	-	AA	BB	BB	AA	BB	AA	AA	BB	BB	AA	BB	BB	BB	AA	AA	BB
IWA115	wsnp_BE442961A_Ta_2_1	[T/G]	BB	AA	AA	BB	AA	AA	BB	AA	AA	AA	AA	BB	-	BB	BB	BB	AA	BB	BB	-	AA	AA	BB	BB	BB	BB	BB	BB	BB	BB	BB	AA	AA	BB	BB	BB	BB	AA	AA	BB	AA	BB	AA	BB	BB	AA	AA
IWA135	wsnp_BE443588A_Ta_2_1	[T/G]	BB	AA	AA	BB	BB	AA	BB	AA	AA	BB	BB	BB	BB	BB	AA	AA	BB	AA	AA	AA	AA	BB	AA	AA	BB	-	BB	BB	AA	AA	AA	AA	AA	AA	BB	AA	BB	BB	BB	BB	AA	BB	AA	AA	AA	BB	AA
IWA136	wsnp_BE443588A_Ta_2_2	[T/G]	BB	AA	AA	BB	BB	AA	BB	AA	AA	BB	BB	BB	BB	BB	AA	AA	BB	AA	AA	AA	AA	BB	AA	AA	BB	AA	BB	BB	AA	AA	AA	AA	AA	AA	BB	AA	BB	BB	BB	BB	AA	BB	AA	AA	AA	BB	AA
IWA188	wsnp_BE446240B_Ta_2_1	[A/G]	BB	AA	BB	BB	BB	BB	BB	BB	-	BB	BB	BB	BB	AA	AA	BB	AA	AA	-	BB	BB	AA	AA	BB	BB	AA	AA	AA	BB	BB	BB	AA	BB	AA	AA	BB	BB	AA	BB	BB	BB	BB	BB	AA	BB	BB	AA
IWA332	wsnp_BE499835B_Ta_2_5	[T/G]	BB	AA	BB	AA	BB	AA	AA	AA	AA	AA	AA	BB	AA	-	BB	AA	BB	AA	AA	AA	BB	AA	AA	BB	-	AA	BB	BB	AA	AA	AA	BB	AA	BB	AA	AA	AA	AA	BB	BB	AA	BB	AA	BB	AA	AA	BB
IWA372	wsnp_BE591243A_Td_2_2	[T/C]	BB	AA	BB	BB	AA	BB	AA	BB	AA	BB	BB	AA	BB	BB	BB	BB	BB	AA	BB	AA	AA	BB	AA	AA	BB	AA	AA	BB	BB	AA	BB	BB	AA	AA	AA	BB	BB	AA	AA	BB	AA	-	BB	AA	BB	BB	BB
IWA400	wsnp_BE636872A_Ta_2_6	[T/C]	BB	AA	AA	AA	AA	BB	AA	AA	AA	BB	AA	BB	BB	BB	AA	AA	BB	BB	AA	AA	AA	AA	AA	AA	BB	AA	BB	AA	AA	BB	AA	BB	BB	AA	BB	AA	AA	BB	AA	BB	AA	BB	BB	BB	BB	AA	AA
IWA446	wsnp_BF292987B_Td_2_1	[A/G]	BB	AA	BB	AA	BB	BB	AA	AA	BB	AA	AA	BB	AA	BB	AA	-	AA	AA	BB	AA	BB	AA	AA	BB	AA	AA	AA	AA	BB	BB	-	BB	AA	AA	BB	BB	AA	BB	AA	BB	AA	AA	AA	AA	BB	BB	AA
IWA500	wsnp_BF482960B_Ta_1_4	[T/G]	BB	AA	BB	BB	AA	BB	BB	AA	BB	BB	AA	AA	AA	AA	BB	AA	AA	AA	BB	-	AA	-	AA	BB	AA	AA	AA	BB	BB	-	AA	AA	AA	AA	AA	BB	BB	BB	BB	AA	AA	AA	BB	BB	BB	AA	BB
IWA616	wsnp_BQ160970A_Ta_2_7	[A/G]	BB	AA	-	BB	BB	BB	BB	AA	AA	BB	BB	AA	AA	BB	AA	AA	BB	BB	BB	BB	BB	BB	BB	BB	AA	AA	AA	AA	BB	AA	BB	AA	AA	BB	BB	BB	BB	BB	AA	BB	AA	AA	AA	AA	BB	BB	AA
IWA894	wsnp_CAP11_rep_c8668_3741698	[T/C]	BB	AA	-	BB	BB	BB	AA	AA	AA	BB	AA	BB	BB	BB	BB	AA	AA	AA	AA	AA	BB	BB	AA	AA	BB	AA	BB	BB	BB	AA	AA	BB	BB	BB	BB	AA	BB	AA	-	AA	AA	BB	AA	BB	BB	AA	-
IWA967	wsnp_CAP12_c475_258416	[A/G]	BB	AA	BB	BB	AA	AA	BB	AA	AA	AA	BB	BB	AA	AA	AA	AA	AA	BB	AA	-	AA	AA	AA	AA	AA	BB	AA	AA	AA	BB	AA	AA	BB	BB	AA	AA	BB	BB	AA	BB	AA	BB	AA	AA	AA	BB	BB
IWA1076	wsnp_CAP7_c317_172502	[T/C]	BB	AA	AA	BB	AA	BB	BB	BB	BB	AA	BB	AA	BB	BB	BB	BB	BB	BB	BB	BB	BB	AA	-	-	BB	AA	BB	BB	BB	BB	AA	BB	BB	BB	AA	BB	AA	AA	BB	AA	-	BB	AA	BB	AA	BB	BB
IWA1196	wsnp_CAP8_c4989_2410261	[T/C]	BB	AA	BB	AA	AA	AA	AA	BB	AA	AA	AA	AA	AA	AA	AA	BB	AA	AA	BB	BB	AA	AA	AA	BB	AA	BB	BB	AA	AA	AA	BB	AA	BB	AA	AA	BB	AA	AA	BB	AA	AA	AA	AA	AA	BB	BB	BB
IWA1315	wsnp_Ex_c10342_16938528	[T/C]	BB	AA	AA	BB	AA	BB	BB	AA	BB	BB	BB	BB	BB	BB	AA	BB	BB	BB	BB	BB	BB	AA	AA	AA	BB	AA	AA	BB	AA	BB	AA	BB	AA	BB	AA	BB	AA	BB	AA	AA	AA	AA	BB	AA	AA	AA	AA
IWA1344	wsnp_Ex_c10548_17228697	[T/C]	BB	AA	BB	BB	AA	BB	BB	AA	-	-	AA	BB	AA	AA	BB	AA	-	AA	BB	-	AA	BB	-	-	AA	AA	AA	BB	BB	AA	AA	AA	AA	AA	AA	-	BB	BB	BB	BB	AA	AA	BB	-	BB	AA	AA
IWA1559	wsnp_Ex_c11939_19147602	[T/C]	BB	AA	AA	BB	BB	AA	BB	AA	AA	BB	AA	AA	BB	BB	AA	AA	BB	AA	AA	AA	AA	BB	BB	AA	BB	BB	BB	AA	AA	BB	AA	BB	AA	AA	BB	BB	AA	AA	BB	AA	AA	AA	AA	AA	AA	-	AA
IWA1686	wsnp_Ex_c1279_2451699	[A/G]	BB	AA	AA	AA	BB	AA	BB	BB	BB	BB	BB	BB	BB	BB	AA	AA	AA	BB	BB	BB	AA	BB	BB	BB	AA	AA	BB	AA	BB	BB	BB	AA	AA	AA	BB	BB	-	AA	AA	AA	-	BB	AA	AA	AA	BB	AA
IWA1903	wsnp_Ex_c14502_22512364	[T/C]	BB	AA	BB	BB	AA	BB	AA	BB	BB	AA	BB	BB	BB	AA	BB	AA	BB	AA	BB	BB	AA	BB	AA	BB	AA	BB	AA	AA	AA	AA	AA	BB	AA	BB	AA	BB	BB	BB	AA	BB	AA	BB	BB	BB	AA	AA	AA
IWA2307	wsnp_Ex_c18382_27210656	[T/C]	BB	AA	AA	-	AA	AA	BB	BB	AA	AA	AA	BB	AA	AA	AA	AA	AA	BB	AA	BB	AA	AA	AA	AA	AA	BB	AA	AA	AA	AA	AA	BB	AA	AA	AA	AA	BB	AA	AA	AA	BB	AA	BB	AA	BB	AA	AA
IWA2624	wsnp_Ex_c2153_4043746	[T/C]	BB	AA	AA	AA	AA	BB	AA	AA	AA	BB	BB	AA	AA	BB	AA	BB	-	BB	BB	AA	BB	AA	AA	AA	BB	AA	AA	AA	AA	AA	BB	BB	BB	BB	AA	BB	AA	AA	BB	AA	AA	BB	-	BB	AA	AA	BB
IWA2644	wsnp_Ex_c2171_4073629	[T/C]	BB	AA	AA	BB	AA	BB	BB	BB	BB	BB	AA	AA	AA	BB	BB	BB	BB	-	BB	BB	AA	BB	BB	AA	BB	BB	AA	BB	BB	BB	BB	BB	BB	AA	AA	BB	BB	AA	BB	AA	BB	BB	BB	AA	BB	AA	BB
IWA2673	wsnp_Ex_c22018_31192778	[T/G]	BB	AA	AA	-	AA	BB	AA	AA	BB	BB	AA	AA	AA	BB	-	BB	-	BB	BB	AA	BB	AA	AA	AA	BB	AA	AA	AA	-	AA	-	AA	BB	BB	AA	BB	AA	AA	BB	BB	AA	BB	BB	BB	AA	AA	BB
IWA2832	wsnp_Ex_c23755_32994701	[A/G]	BB	AA	AA	BB	AA	BB	BB	AA	BB	BB	BB	BB	BB	BB	AA	BB	BB	BB	BB	BB	BB	AA	AA	AA	BB	AA	AA	BB	AA	BB	AA	BB	AA	BB	AA	BB	AA	BB	AA	AA	AA	AA	BB	AA	AA	AA	AA
IWA3019	wsnp_Ex_c26098_35349418	[T/C]	BB	AA	BB	BB	AA	BB	BB	BB	BB	AA	BB	BB	BB	BB	BB	AA	BB	AA	BB	BB	AA	BB	AA	BB	AA	BB	AA	BB	AA	AA	AA	BB	AA	BB	AA	BB	BB	BB	AA	BB	BB	-	BB	BB	AA	BB	AA
IWA3046	wsnp_Ex_c2639_4899517	[A/G]	BB	AA	BB	AA	AA	AA	AA	-	AA	AA	AA	AA	AA	BB	AA	BB	AA	AA	BB	BB	AA	-	AA	BB	AA	BB	AA	AA	AA	-	AA	AA	BB	AA	AA	BB	AA	BB	BB	AA	AA	AA	-	BB	BB	BB	BB
IWA506	wsnp_BF483640B_Ta_2_2	[A/G]	BB	AA	BB	BB	AA	BB	AA	AA	BB	AA	BB	AA	AA	AA	BB	BB	AA	AA	AA	AA	AA	AA	BB	BB	AA	AA	BB	BB	AA	BB	AA	BB	AA	BB	BB	BB	AA	BB	BB	BB	BB	BB	BB	AA	AA	AA	BB
IWA1269	wsnp_Ex_c10014_16476905	[A/C]	BB	AA	AA	BB	BB	AA	BB	BB	AA	AA	AA	BB	BB	BB	BB	-	AA	BB	AA	AA	AA	AA	AA	AA	AA	AA	BB	AA	AA	BB	BB	BB	BB	BB	BB	BB	BB	BB	BB	AA	AA	AA	AA	AA	AA	AA	BB
IWA1312	wsnp_Ex_c1032_1972861	[A/C]	BB	AA	BB	AA	AA	BB	BB	BB	BB	AA	AA	BB	AA	AA	BB	BB	BB	BB	BB	AA	BB	AA	AA	AA	AA	AA	BB	AA	AA	BB	BB	BB	BB	BB	BB	BB	AA	AA	AA	AA	AA	AA	AA	AA	AA	BB	BB
IWA1646	wsnp_Ex_c12556_19991276	[A/G]	BB	AA	AA	BB	AA	AA	BB	BB	AA	BB	AA	BB	AA	AA	BB	BB	BB	BB	AA	AA	BB	BB	BB	AA	AA	AA	BB	BB	AA	AA	BB	BB	AA	BB	BB	BB	AA	AA	AA	AA	AA	AA	AA	AA	AA	BB	AA
IWA1666	wsnp_Ex_c12674_20142989	[A/C]	BB	AA	BB	AA	AA	AA	BB	AA	AA	AA	BB	BB	AA	AA	AA	AA	AA	BB	AA	AA	AA	AA	AA	AA	AA	AA	AA	AA	AA	BB	AA	BB	BB	BB	AA	AA	BB	BB	AA	BB	AA	BB	AA	AA	BB	BB	BB
IWA1678	wsnp_Ex_c12750_20243224	[T/C]	BB	AA	AA	BB	AA	AA	BB	AA	AA	BB	AA	AA	AA	BB	AA	AA	BB	BB	BB	BB	BB	BB	BB	AA	BB	AA	BB	AA	BB	BB	AA	AA	BB	AA	AA	BB	AA	AA	AA	BB	BB	AA	BB	BB	AA	AA	AA
IWA1780	wsnp_Ex_c13485_21225504	[A/G]	BB	AA	AA	AA	AA	AA	AA	AA	AA	AA	BB	AA	BB	AA	BB	AA	AA	AA	AA	AA	AA	AA	BB	BB	BB	BB	BB	AA	BB	BB	AA	AA	BB	BB	AA	AA	BB	BB	BB	AA	AA	AA	AA	BB	BB	AA	BB
IWA1799	wsnp_Ex_c13686_21480826	[A/G]	BB	AA	BB	AA	AA	BB	AA	BB	AA	BB	BB	BB	AA	AA	AA	BB	BB	BB	AA	AA	AA	BB	BB	BB	AA	AA	AA	BB	AA	AA	AA	AA	AA	AA	AA	AA	BB	BB	BB	BB	AA	AA	BB	AA	BB	AA	BB
IWA1802	wsnp_Ex_c13721_21532196	[A/G]	BB	AA	BB	AA	AA	BB	AA	AA	BB	AA	AA	AA	AA	BB	BB	BB	AA	BB	BB	BB	AA	BB	BB	AA	AA	AA	AA	BB	AA	BB	AA	AA	AA	BB	BB	BB	AA	AA	BB	AA	BB	BB	AA	BB	AA	AA	BB
IWA1881	wsnp_Ex_c14248_22204549	[T/C]	BB	AA	AA	BB	BB	BB	AA	AA	BB	BB	AA	BB	AA	BB	AA	BB	BB	AA	BB	AA	BB	BB	AA	AA	AA	AA	AA	BB	BB	BB	AA	BB	AA	AA	AA	BB	AA	BB	AA	AA	AA	BB	BB	AA	AA	AA	AA
IWA1921	wsnp_Ex_c14654_22713620	[T/C]	BB	AA	AA	BB	AA	AA	AA	BB	BB	BB	AA	AA	BB	AA	BB	AA	BB	BB	AA	AA	BB	AA	BB	AA	AA	BB	BB	AA	AA	BB	BB	AA	AA	BB	BB	BB	AA	AA	BB	BB	BB	AA	BB	BB	AA	BB	AA
IWA1980	wsnp_Ex_c15089_23270403	[T/C]	BB	AA	AA	AA	AA	BB	AA	AA	BB	BB	AA	AA	AA	BB	BB	BB	BB	AA	AA	AA	BB	AA	-	AA	BB	AA	AA	AA	AA	AA	BB	AA	BB	BB	AA	BB	AA	AA	BB	AA	BB	BB	BB	BB	AA	AA	BB
IWA2101	wsnp_Ex_c16127_24561453	[A/G]	BB	AA	AA	BB	AA	AA	BB	BB	AA	BB	BB	BB	BB	BB	BB	AA	AA	AA	BB	BB	AA	BB	BB	BB	AA	BB	BB	AA	BB	AA	BB	AA	BB	AA	BB	BB	AA	AA	BB	AA	BB	BB	AA	AA	AA	BB	AA
IWA2196	wsnp_Ex_c17230_25883590	[T/C]	BB	AA	AA	BB	AA	AA	AA	BB	BB	BB	AA	AA	BB	AA	BB	AA	BB	BB	AA	AA	BB	AA	BB	AA	AA	BB	BB	AA	AA	BB	BB	AA	AA	BB	BB	BB	AA	AA	BB	BB	BB	AA	BB	BB	AA	BB	AA
IWA2375	wsnp_Ex_c19082_27999258	[A/G]	BB	AA	AA	AA	AA	AA	BB	BB	AA	BB	BB	BB	AA	AA	AA	BB	AA	BB	AA	BB	AA	AA	AA	AA	AA	BB	AA	AA	AA	AA	AA	BB	AA	AA	AA	AA	BB	BB	BB	BB	BB	AA	BB	AA	BB	AA	AA
IWA2425	wsnp_Ex_c19516_28481857	[A/G]	BB	AA	AA	BB	BB	AA	AA	AA	-	AA	BB	AA	AA	-	BB	BB	AA	-	AA	BB	BB	AA	BB	AA	AA	AA	AA	-	BB	AA	AA	AA	BB	AA	-	BB	AA	BB	BB	-	AA	BB	AA	BB	AA	BB	BB
IWA2509	wsnp_Ex_c20155_29202599	[T/C]	BB	AA	AA	AA	AA	BB	BB	AA	BB	BB	AA	AA	AA	AA	BB	BB	BB	AA	BB	BB	BB	AA	AA	BB	BB	BB	AA	BB	AA	BB	AA	AA	BB	AA	BB	BB	BB	AA	BB	AA	BB	AA	AA	BB	BB	BB	BB
IWA2527	wsnp_Ex_c20352_29416468	[A/G]	BB	AA	AA	AA	BB	BB	AA	-	AA	AA	BB	AA	AA	BB	AA	BB	AA	AA	BB	AA	AA	BB	AA	AA	BB	AA	BB	AA	AA	BB	BB	BB	BB	AA	BB	AA	AA	BB	BB	AA	AA	BB	AA	BB	AA	AA	BB
IWA2565	wsnp_Ex_c210_411604	[A/C]	BB	AA	AA	AA	AA	AA	AA	AA	AA	AA	BB	AA	BB	AA	BB	AA	AA	AA	AA	AA	AA	AA	BB	-	BB	BB	BB	AA	BB	BB	AA	AA	BB	BB	AA	AA	BB	BB	BB	AA	AA	AA	AA	BB	BB	AA	BB
IWA2603	wsnp_Ex_c21374_30504135	[T/C]	BB	AA	AA	AA	BB	BB	AA	-	AA	AA	BB	AA	AA	BB	-	BB	AA	AA	BB	AA	AA	BB	AA	AA	BB	AA	BB	AA	AA	BB	BB	BB	BB	AA	BB	AA	AA	BB	BB	AA	AA	BB	AA	BB	AA	AA	BB
IWA2643	wsnp_Ex_c2171_4073472	[A/G]	BB	AA	AA	BB	AA	BB	BB	BB	BB	BB	AA	AA	AA	BB	BB	BB	BB	-	BB	BB	AA	BB	BB	AA	BB	BB	AA	BB	BB	BB	BB	BB	BB	AA	AA	BB	BB	AA	BB	AA	BB	BB	BB	AA	BB	AA	BB
IWA2661	wsnp_Ex_c21924_31095740	[T/C]	BB	AA	BB	AA	AA	AA	AA	-	AA	AA	AA	AA	AA	BB	AA	BB	AA	AA	BB	BB	AA	-	AA	BB	AA	BB	AA	AA	AA	-	AA	AA	BB	AA	AA	BB	AA	BB	BB	AA	AA	AA	-	BB	BB	BB	BB
IWA2780	wsnp_Ex_c23122_32350412	[T/C]	BB	AA	AA	AA	AA	AA	BB	AA	AA	AA	AA	AA	AA	AA	AA	AA	AA	BB	AA	AA	AA	AA	AA	AA	AA	-	AA	AA	AA	AA	AA	AA	AA	AA	AA	AA	BB	AA	AA	AA	BB	AA	AA	AA	AA	AA	AA
IWA2868	wsnp_Ex_c24053_33299143	[A/G]	BB	AA	BB	BB	AA	BB	AA	BB	BB	BB	BB	BB	BB	BB	BB	AA	BB	AA	BB	BB	AA	BB	AA	BB	AA	BB	AA	AA	AA	AA	AA	BB	AA	BB	AA	BB	BB	BB	AA	BB	AA	BB	BB	BB	AA	AA	AA
IWA2887	wsnp_Ex_c2430_4546479	[A/G]	BB	AA	AA	AA	AA	AA	AA	AA	AA	BB	BB	AA	AA	BB	AA	BB	AA	BB	BB	AA	AA	AA	AA	AA	BB	AA	AA	AA	AA	AA	-	-	BB	BB	AA	BB	AA	AA	BB	AA	AA	BB	AA	BB	AA	AA	BB
IWA2894	wsnp_Ex_c24376_33619527	[T/G]	BB	AA	AA	AA	AA	BB	BB	AA	BB	BB	BB	BB	BB	BB	AA	BB	BB	BB	BB	BB	BB	AA	AA	AA	BB	AA	AA	BB	AA	BB	AA	BB	AA	BB	AA	BB	AA	AA	AA	AA	AA	AA	BB	AA	AA	AA	AA
IWA2895	wsnp_Ex_c24379_33621872	[A/G]	BB	AA	BB	BB	AA	BB	BB	BB	BB	AA	BB	BB	BB	BB	BB	AA	BB	AA	BB	BB	AA	BB	AA	BB	AA	BB	AA	BB	AA	AA	AA	BB	AA	BB	AA	BB	-	BB	AA	BB	BB	-	BB	BB	AA	BB	AA
IWA2905	wsnp_Ex_c24486_33732900	[T/C]	BB	AA	AA	AA	BB	AA	AA	AA	AA	BB	BB	AA	AA	BB	BB	BB	AA	AA	BB	BB	AA	AA	AA	BB	BB	AA	AA	AA	AA	AA	AA	BB	BB	BB	BB	AA	BB	AA	BB	AA	BB	BB	AA	BB	AA	BB	AA
IWA2946	wsnp_Ex_c25043_34305764	[A/G]	BB	AA	AA	AA	AA	BB	BB	AA	BB	BB	AA	AA	AA	AA	BB	BB	BB	AA	AA	BB	BB	AA	AA	BB	BB	BB	AA	BB	AA	BB	AA	AA	BB	AA	-	BB	BB	AA	BB	AA	BB	AA	AA	BB	BB	BB	BB
IWA3021	wsnp_Ex_c26128_35374652	[A/G]	BB	AA	BB	AA	AA	AA	AA	BB	AA	BB	AA	BB	BB	AA	AA	BB	BB	AA	AA	BB	AA	AA	AA	BB	BB	BB	BB	AA	AA	BB	BB	AA	BB	AA	AA	BB	AA	AA	BB	AA	AA	AA	AA	AA	BB	BB	BB
IWA3063	wsnp_Ex_c26747_35974837	[T/C]	BB	AA	AA	BB	BB	BB	AA	AA	BB	BB	AA	BB	AA	BB	AA	BB	BB	AA	BB	AA	BB	BB	AA	AA	AA	AA	AA	BB	BB	BB	AA	BB	AA	AA	AA	BB	AA	BB	AA	AA	AA	BB	BB	AA	AA	AA	AA
IWA3193	wsnp_Ex_c2887_5330426	[T/C]	BB	AA	BB	BB	AA	AA	AA	BB	AA	BB	BB	BB	BB	BB	AA	AA	BB	AA	BB	AA	AA	BB	-	AA	AA	AA	BB	BB	BB	AA	BB	BB	AA	BB	BB	BB	AA	AA	AA	BB	AA	BB	AA	AA	AA	AA	BB
IWA3214	wsnp_Ex_c29130_38196906	[A/G]	BB	AA	AA	AA	BB	AA	AA	BB	BB	BB	AA	AA	BB	AA	BB	AA	BB	AA	BB	BB	AA	BB	AA	AA	BB	BB	BB	BB	BB	BB	AA	AA	BB	BB	BB	AA	BB	BB	BB	AA	AA	AA	AA	AA	BB	AA	BB
IWA3272	wsnp_Ex_c30368_39293223	[T/G]	BB	AA	BB	AA	AA	BB	AA	AA	BB	BB	BB	AA	BB	BB	AA	BB	AA	AA	BB	BB	AA	BB	BB	BB	BB	BB	AA	AA	BB	BB	BB	AA	BB	AA	BB	BB	BB	-	-	BB	BB	AA	AA	BB	BB	BB	AA
IWA3415	wsnp_Ex_c32905_41484291	[A/G]	BB	AA	AA	BB	AA	AA	BB	BB	AA	BB	AA	BB	AA	AA	BB	BB	BB	BB	AA	AA	BB	BB	BB	AA	AA	AA	BB	BB	AA	AA	BB	BB	AA	BB	BB	BB	AA	AA	AA	AA	AA	AA	AA	AA	AA	BB	AA
IWA3416	wsnp_Ex_c32905_41484359	[T/C]	BB	AA	AA	BB	AA	AA	BB	BB	AA	BB	AA	BB	AA	AA	BB	BB	BB	BB	AA	AA	BB	BB	BB	AA	AA	AA	BB	BB	AA	AA	BB	BB	AA	BB	BB	BB	AA	AA	AA	AA	AA	AA	AA	-	AA	BB	AA
IWA3492	wsnp_Ex_c34694_42959047	[T/C]	BB	AA	BB	BB	BB	AA	BB	BB	AA	BB	AA	AA	BB	AA	AA	AA	BB	AA	AA	AA	AA	BB	BB	AA	BB	BB	BB	BB	AA	BB	AA	BB	AA	AA	BB	AA	AA	AA	BB	AA	AA	AA	BB	AA	AA	-	AA
IWA3581	wsnp_Ex_c3666_6687275	[A/G]	BB	AA	AA	BB	AA	AA	BB	AA	AA	AA	AA	BB	-	BB	BB	BB	AA	BB	BB	-	AA	AA	BB	BB	BB	BB	BB	BB	BB	BB	BB	AA	AA	BB	BB	-	BB	AA	AA	BB	AA	BB	AA	BB	BB	AA	AA
IWA3583	wsnp_Ex_c3670_6694480	[T/C]	BB	AA	BB	AA	BB	AA	BB	BB	BB	BB	AA	BB	BB	BB	AA	AA	BB	BB	AA	AA	AA	BB	AA	BB	AA	AA	BB	AA	BB	AA	BB	AA	BB	AA	BB	BB	-	AA	AA	AA	BB	AA	AA	AA	AA	BB	AA
IWA3699	wsnp_Ex_c3990_7223090	[T/C]	BB	AA	BB	BB	AA	AA	BB	AA	AA	AA	BB	AA	AA	AA	AA	AA	AA	BB	AA	AA	AA	AA	AA	AA	AA	BB	AA	AA	AA	AA	AA	-	AA	AA	AA	AA	BB	BB	AA	BB	BB	BB	AA	AA	AA	AA	AA
IWA3783	wsnp_Ex_c41553_48351921	[T/C]	BB	AA	AA	BB	BB	AA	BB	AA	AA	AA	AA	AA	AA	BB	AA	AA	BB	AA	AA	AA	AA	BB	AA	AA	BB	BB	BB	AA	AA	BB	AA	BB	AA	AA	AA	AA	AA	AA	BB	AA	AA	AA	AA	AA	AA	BB	BB
IWA3864	wsnp_Ex_c4331_7808746	[A/G]	BB	AA	AA	AA	BB	AA	AA	AA	AA	BB	BB	AA	BB	BB	BB	BB	AA	BB	BB	BB	BB	AA	AA	BB	BB	BB	AA	AA	AA	AA	BB	BB	AA	AA	-	AA	AA	-	AA	AA	AA	BB	AA	AA	AA	BB	AA
IWA3945	wsnp_Ex_c4561_8184576	[A/G]	BB	AA	BB	BB	AA	BB	BB	BB	BB	BB	-	BB	BB	AA	AA	BB	AA	AA	AA	BB	BB	AA	AA	BB	BB	AA	AA	AA	BB	BB	BB	AA	BB	AA	AA	BB	BB	AA	-	BB	BB	AA	BB	AA	BB	BB	AA
IWA3958	wsnp_Ex_c46061_51675763	[A/G]	BB	AA	AA	-	AA	BB	BB	AA	BB	BB	BB	BB	BB	BB	AA	BB	BB	BB	BB	BB	BB	AA	AA	AA	BB	AA	AA	BB	AA	BB	AA	BB	AA	BB	AA	BB	AA	BB	AA	AA	AA	AA	BB	AA	AA	AA	AA
IWA3959	wsnp_Ex_c46061_51675853	[A/G]	BB	AA	AA	-	AA	BB	BB	AA	BB	BB	BB	BB	BB	BB	AA	BB	BB	BB	BB	BB	BB	AA	AA	AA	BB	AA	AA	BB	AA	BB	AA	BB	AA	BB	AA	BB	AA	BB	AA	AA	AA	AA	BB	AA	AA	AA	AA
IWA4169	wsnp_Ex_c5334_9427658	[T/G]	BB	AA	AA	-	AA	AA	BB	AA	AA	AA	AA	AA	AA	AA	AA	AA	AA	BB	AA	AA	AA	AA	AA	AA	AA	BB	AA	AA	AA	BB	AA	-	AA	AA	AA	AA	BB	AA	AA	AA	BB	AA	AA	AA	BB	AA	AA
IWA4179	wsnp_Ex_c534_1058778	[A/C]	BB	AA	AA	BB	BB	AA	AA	AA	BB	BB	AA	-	BB	BB	BB	BB	BB	AA	AA	AA	AA	-	BB	BB	BB	AA	AA	BB	AA	AA	BB	AA	AA	AA	AA	AA	BB	BB	BB	AA	AA	BB	AA	BB	BB	AA	BB
IWA4196	wsnp_Ex_c53843_56941644	[A/G]	BB	AA	AA	AA	AA	-	AA	AA	BB	AA	BB	AA	BB	BB	BB	BB	AA	AA	BB	BB	BB	BB	AA	AA	AA	-	AA	AA	AA	BB	AA	BB	AA	BB	BB	AA	BB	AA	AA	AA	BB	BB	AA	BB	BB	AA	BB
IWA4226	wsnp_Ex_c54357_57265797	[T/C]	BB	AA	AA	AA	AA	AA	AA	AA	AA	-	AA	BB	-	AA	AA	-	BB	-	AA	BB	AA	AA	AA	BB	BB	BB	AA	AA	AA	BB	BB	AA	BB	AA	AA	BB	AA	BB	BB	AA	AA	AA	AA	AA	BB	AA	BB
IWA4287	wsnp_Ex_c56035_58313520	[T/C]	BB	AA	AA	AA	AA	AA	BB	AA	AA	AA	AA	AA	AA	AA	AA	AA	AA	BB	AA	AA	AA	AA	AA	AA	AA	AA	AA	AA	AA	AA	AA	AA	AA	AA	AA	AA	BB	AA	AA	AA	BB	AA	AA	AA	AA	AA	AA
IWA4288	wsnp_Ex_c5608_9867710	[A/G]	BB	AA	AA	AA	AA	BB	AA	AA	BB	AA	AA	-	BB	BB	BB	BB	AA	BB	BB	BB	BB	BB	BB	AA	AA	-	AA	AA	AA	BB	AA	BB	AA	BB	BB	AA	AA	AA	AA	AA	BB	BB	AA	BB	AA	AA	BB
IWA4452	wsnp_Ex_c6223_10857649	[A/G]	BB	AA	-	AA	AA	AA	AA	-	BB	-	AA	-	-	AA	AA	BB	BB	AA	AA	BB	AA	AA	AA	BB	BB	BB	BB	AA	AA	AA	BB	AA	BB	AA	AA	BB	AA	AA	BB	AA	AA	AA	AA	AA	BB	BB	BB
IWA4557	wsnp_Ex_c6611_11452297	[A/G]	BB	AA	BB	BB	AA	BB	BB	BB	AA	BB	-	BB	BB	AA	AA	BB	AA	AA	AA	BB	BB	AA	AA	BB	BB	AA	AA	AA	BB	BB	BB	AA	BB	AA	AA	BB	BB	AA	-	BB	BB	AA	BB	AA	BB	BB	AA
IWA4620	wsnp_Ex_c7071_12171222	[T/C]	BB	AA	AA	AA	AA	BB	AA	AA	AA	AA	BB	AA	BB	BB	BB	BB	AA	AA	BB	BB	AA	BB	AA	AA	AA	-	AA	AA	AA	BB	AA	BB	AA	BB	BB	AA	BB	AA	AA	AA	BB	BB	AA	BB	BB	AA	BB
IWA4675	wsnp_Ex_c742_1458033	[T/G]	BB	AA	AA	BB	AA	BB	BB	AA	-	BB	AA	AA	AA	AA	AA	AA	BB	BB	AA	BB	AA	BB	BB	AA	BB	AA	BB	AA	BB	BB	BB	AA	BB	BB	BB	-	AA	AA	AA	BB	BB	BB	BB	BB	BB	AA	AA
IWA4701	wsnp_Ex_c758_1488368	[T/C]	BB	AA	BB	AA	BB	BB	AA	AA	BB	AA	AA	BB	AA	BB	AA	-	AA	AA	BB	AA	BB	AA	AA	BB	AA	AA	AA	AA	BB	BB	-	BB	AA	AA	BB	BB	AA	BB	AA	BB	AA	AA	AA	AA	BB	BB	AA
IWA4715	wsnp_Ex_c7705_13139890	[A/G]	BB	AA	AA	BB	BB	BB	AA	BB	AA	BB	BB	BB	BB	AA	BB	AA	AA	AA	AA	BB	BB	BB	AA	BB	BB	AA	AA	BB	-	AA	BB	AA	BB	AA	AA	BB	BB	BB	BB	BB	BB	AA	BB	AA	BB	AA	AA
IWA4720	wsnp_Ex_c7738_13195349	[A/G]	BB	AA	AA	-	AA	AA	AA	AA	AA	BB	BB	AA	AA	BB	-	BB	-	BB	BB	AA	AA	AA	AA	AA	BB	AA	AA	AA	AA	AA	-	BB	BB	BB	AA	BB	AA	AA	BB	AA	AA	BB	-	BB	AA	AA	BB
IWA4817	wsnp_Ex_c8614_14453388	[T/C]	BB	AA	AA	AA	AA	BB	AA	AA	BB	AA	AA	-	BB	BB	BB	BB	AA	BB	BB	BB	AA	BB	BB	AA	AA	-	AA	BB	AA	BB	AA	BB	AA	BB	BB	AA	AA	AA	AA	AA	BB	BB	AA	BB	AA	AA	BB
IWA4890	wsnp_Ex_c922_1775246	[A/G]	BB	AA	AA	BB	AA	BB	BB	BB	BB	BB	BB	AA	AA	BB	BB	BB	BB	BB	BB	BB	BB	AA	BB	BB	BB	BB	BB	AA	BB	BB	-	AA	BB	BB	AA	BB	AA	AA	BB	BB	-	BB	BB	BB	BB	AA	AA
IWA4924	wsnp_Ex_c9470_15701734	[A/G]	BB	AA	AA	-	AA	AA	BB	AA	AA	AA	AA	AA	AA	AA	AA	AA	AA	BB	AA	AA	AA	AA	AA	AA	AA	BB	AA	AA	AA	-	AA	-	AA	AA	AA	AA	BB	AA	AA	AA	BB	AA	AA	AA	-	AA	AA
IWA4952	wsnp_Ex_c9656_15963185	[T/C]	BB	AA	-	AA	AA	-	AA	-	AA	-	BB	BB	AA	-	AA	AA	-	-	AA	AA	AA	-	-	-	AA	AA	-	-	AA	AA	AA	AA	AA	AA	AA	BB	-	BB	BB	-	AA	-	-	BB	BB	AA	-
IWA4978	wsnp_Ex_c9918_16332583	[A/C]	BB	AA	AA	BB	BB	AA	BB	AA	AA	BB	AA	AA	BB	BB	AA	AA	BB	AA	AA	AA	AA	BB	BB	AA	BB	BB	BB	AA	AA	BB	AA	BB	AA	AA	BB	BB	AA	AA	BB	AA	AA	AA	AA	AA	AA	-	AA
IWA4996	wsnp_Ex_c9982_16429661	[A/G]	BB	AA	AA	AA	AA	BB	AA	AA	BB	AA	AA	BB	BB	BB	BB	BB	AA	BB	BB	BB	AA	BB	BB	AA	AA	BB	AA	BB	AA	BB	AA	BB	AA	BB	BB	BB	AA	AA	AA	AA	BB	BB	AA	BB	AA	AA	BB
IWA5029	wsnp_Ex_rep_c101703_87021883	[A/G]	BB	AA	AA	-	AA	AA	BB	AA	AA	AA	AA	AA	AA	AA	AA	AA	AA	BB	AA	AA	AA	AA	AA	AA	AA	BB	AA	AA	AA	-	AA	-	AA	AA	AA	AA	BB	AA	AA	AA	BB	AA	AA	AA	-	AA	AA
IWA5050	wsnp_Ex_rep_c102110_87348288	[A/C]	BB	AA	AA	BB	BB	BB	BB	BB	BB	BB	BB	BB	AA	BB	BB	BB	AA	BB	AA	-	AA	-	AA	AA	AA	AA	BB	AA	BB	BB	BB	BB	AA	BB	BB	BB	AA	AA	AA	AA	AA	BB	BB	AA	BB	AA	AA
IWA5064	wsnp_Ex_rep_c102385_87568304	[T/C]	BB	AA	BB	BB	BB	BB	AA	BB	AA	AA	BB	AA	AA	AA	BB	BB	BB	AA	BB	AA	AA	BB	AA	AA	BB	AA	AA	BB	BB	BB	BB	BB	AA	BB	AA	BB	BB	AA	AA	BB	AA	-	BB	-	AA	AA	BB
IWA5107	wsnp_Ex_rep_c103972_88799335	[A/G]	BB	AA	AA	AA	AA	AA	AA	-	AA	BB	BB	BB	BB	BB	BB	AA	AA	AA	BB	BB	AA	BB	BB	BB	BB	BB	BB	AA	BB	AA	BB	AA	BB	BB	BB	BB	AA	AA	-	AA	BB	BB	BB	AA	BB	BB	AA
IWA5148	wsnp_Ex_rep_c106072_90285324	[T/C]	BB	AA	BB	BB	AA	AA	BB	AA	AA	AA	BB	AA	AA	AA	AA	AA	AA	BB	AA	AA	AA	AA	AA	AA	AA	-	AA	AA	AA	AA	AA	AA	AA	AA	AA	AA	BB	BB	AA	BB	BB	BB	AA	AA	AA	AA	AA
IWA5169	wsnp_Ex_rep_c108951_91954190	[A/G]	BB	AA	AA	BB	BB	BB	AA	AA	BB	BB	AA	BB	BB	AA	BB	BB	BB	AA	AA	AA	-	BB	-	BB	BB	AA	AA	BB	AA	AA	BB	BB	-	AA	AA	AA	BB	BB	BB	-	AA	BB	BB	BB	BB	AA	BB
IWA5211	wsnp_Ex_rep_c66356_64538896	[A/G]	BB	AA	AA	AA	AA	BB	-	AA	-	-	BB	AA	AA	BB	-	-	BB	BB	AA	-	BB	AA	BB	-	-	-	AA	BB	-	BB	AA	AA	BB	AA	BB	-	BB	BB	-	AA	-	AA	-	-	BB	BB	-
IWA5215	wsnp_Ex_rep_c66358_64543218	[A/G]	BB	AA	BB	BB	BB	BB	BB	BB	AA	AA	BB	AA	AA	AA	BB	BB	BB	AA	BB	AA	AA	BB	AA	AA	BB	AA	BB	AA	BB	BB	BB	BB	AA	BB	AA	BB	BB	AA	AA	BB	AA	BB	BB	-	AA	AA	BB
IWA5239	wsnp_Ex_rep_c66433_64662690	[T/C]	BB	AA	BB	BB	AA	BB	AA	BB	BB	AA	BB	BB	BB	AA	BB	AA	-	AA	BB	BB	AA	BB	AA	BB	AA	BB	AA	AA	AA	AA	AA	BB	AA	BB	AA	BB	BB	BB	AA	BB	AA	BB	-	BB	AA	AA	AA
IWA5274	wsnp_Ex_rep_c66622_64925813	[A/G]	BB	AA	AA	AA	BB	BB	BB	BB	AA	-	BB	BB	BB	-	BB	BB	-	BB	BB	BB	AA	AA	BB	BB	AA	AA	BB	BB	BB	AA	-	AA	BB	BB	BB	BB	AA	-	BB	-	AA	BB	BB	BB	AA	AA	BB
IWA5528	wsnp_Ex_rep_c68441_67261679	[T/C]	BB	AA	AA	-	AA	AA	BB	BB	AA	BB	BB	BB	BB	BB	BB	AA	AA	AA	BB	BB	AA	BB	BB	BB	AA	BB	BB	AA	BB	AA	BB	AA	BB	BB	BB	BB	AA	AA	BB	AA	BB	BB	BB	AA	BB	BB	AA
IWA5538	wsnp_Ex_rep_c68515_67349716	[T/C]	BB	AA	AA	BB	AA	AA	AA	-	AA	BB	BB	BB	BB	AA	BB	AA	AA	AA	BB	BB	AA	BB	BB	BB	BB	BB	BB	AA	BB	AA	BB	AA	BB	BB	BB	BB	AA	AA	-	AA	BB	BB	BB	AA	BB	BB	AA
IWA5651	wsnp_Ex_rep_c69864_68824319	[T/C]	BB	AA	AA	BB	AA	AA	BB	AA	AA	BB	AA	AA	AA	BB	AA	AA	BB	BB	BB	BB	BB	BB	BB	AA	BB	AA	BB	AA	BB	BB	AA	AA	BB	AA	AA	BB	AA	AA	AA	BB	BB	-	BB	BB	-	AA	AA
IWA5749	wsnp_Ex_rep_c78209_74462664	[T/C]	BB	AA	AA	BB	AA	BB	AA	AA	AA	AA	AA	BB	BB	-	AA	BB	BB	BB	BB	BB	AA	BB	-	AA	BB	AA	AA	AA	BB	-	BB	AA	-	AA	AA	AA	BB	AA	BB	BB	AA	BB	AA	AA	BB	BB	AA
IWA5779	wsnp_JD_c11014_11565501	[T/C]	BB	AA	BB	BB	AA	BB	BB	BB	BB	BB	BB	BB	BB	AA	AA	BB	AA	AA	AA	BB	BB	AA	AA	AA	BB	AA	AA	AA	AA	BB	BB	AA	BB	AA	AA	BB	BB	AA	BB	BB	BB	AA	BB	AA	BB	BB	AA
IWA5865	wsnp_JD_c15643_15039462	[A/G]	BB	AA	AA	BB	AA	AA	BB	AA	AA	AA	AA	BB	AA	BB	-	BB	AA	BB	BB	AA	AA	AA	BB	BB	BB	BB	BB	BB	BB	BB	BB	AA	AA	BB	BB	-	BB	AA	AA	BB	AA	BB	AA	BB	-	AA	AA
IWA5874	wsnp_JD_c16562_15675482	[A/G]	BB	AA	BB	AA	AA	AA	AA	AA	AA	AA	AA	AA	AA	BB	AA	AA	AA	AA	BB	BB	AA	BB	AA	BB	AA	AA	AA	BB	AA	BB	BB	AA	BB	BB	BB	BB	AA	AA	BB	AA	BB	AA	BB	BB	BB	BB	BB
IWA5925	wsnp_JD_c2146_2955972	[T/G]	BB	AA	-	AA	AA	AA	AA	-	AA	-	AA	BB	-	AA	AA	-	BB	BB	AA	BB	AA	AA	AA	BB	BB	BB	AA	AA	AA	BB	BB	AA	BB	AA	AA	BB	AA	BB	BB	AA	AA	AA	AA	AA	BB	AA	BB
IWA5964	wsnp_JD_c26552_21868492	[T/C]	BB	AA	AA	AA	BB	BB	AA	BB	AA	AA	BB	AA	AA	BB	BB	BB	AA	AA	BB	-	AA	BB	BB	AA	BB	AA	BB	AA	BB	BB	BB	BB	BB	AA	BB	AA	AA	BB	BB	AA	AA	BB	AA	BB	BB	AA	AA
IWA5975	wsnp_JD_c27944_22630918	[T/C]	BB	AA	AA	BB	AA	AA	BB	AA	AA	AA	AA	BB	-	BB	BB	BB	AA	BB	BB	-	AA	AA	BB	BB	BB	BB	BB	BB	BB	BB	BB	AA	AA	BB	BB	-	BB	AA	AA	BB	AA	BB	-	BB	BB	AA	AA
IWA5976	wsnp_JD_c2805_3748370	[T/C]	BB	AA	AA	BB	BB	BB	BB	BB	-	BB	BB	BB	BB	AA	BB	AA	AA	AA	AA	BB	BB	BB	AA	BB	BB	AA	AA	BB	BB	AA	BB	AA	BB	AA	AA	BB	BB	BB	BB	BB	BB	AA	BB	AA	BB	AA	AA
IWA6036	wsnp_JD_c3867_4934646	[T/C]	BB	AA	AA	-	AA	AA	BB	BB	AA	-	BB	BB	BB	BB	BB	AA	AA	AA	BB	BB	AA	BB	BB	BB	AA	BB	BB	AA	BB	AA	BB	AA	BB	AA	BB	BB	AA	AA	-	AA	BB	BB	AA	AA	AA	BB	AA
IWA6057	wsnp_JD_c4413_5541607	[T/G]	BB	AA	BB	-	AA	AA	AA	-	AA	AA	AA	AA	-	BB	AA	AA	AA	AA	BB	BB	-	BB	AA	BB	-	AA	AA	BB	AA	BB	BB	AA	BB	BB	BB	BB	AA	AA	BB	AA	BB	AA	BB	BB	BB	BB	BB
IWA6082	wsnp_JD_c493_749195	[T/C]	BB	AA	AA	BB	AA	BB	BB	BB	BB	BB	AA	AA	AA	BB	BB	BB	BB	-	BB	BB	AA	BB	BB	AA	BB	BB	AA	BB	BB	BB	BB	BB	BB	AA	AA	BB	BB	AA	BB	AA	BB	BB	BB	AA	BB	AA	BB
IWA6092	wsnp_JD_c5170_6293946	[A/G]	BB	AA	BB	AA	AA	BB	AA	AA	BB	BB	BB	AA	BB	BB	AA	BB	AA	AA	BB	BB	AA	BB	BB	BB	BB	BB	AA	AA	BB	BB	BB	AA	BB	AA	BB	BB	BB	-	-	BB	BB	AA	AA	BB	BB	BB	AA
IWA6101	wsnp_JD_c5591_6743599	[A/C]	BB	AA	AA	-	AA	AA	BB	AA	AA	AA	AA	AA	AA	AA	AA	AA	AA	BB	AA	AA	AA	AA	AA	AA	AA	BB	AA	AA	AA	-	AA	-	AA	AA	AA	AA	BB	AA	AA	AA	BB	AA	AA	AA	-	AA	AA
IWA6200	wsnp_JD_c8629_9593896	[A/G]	BB	AA	-	AA	AA	AA	AA	BB	AA	BB	AA	BB	BB	AA	AA	BB	BB	BB	AA	BB	AA	AA	AA	BB	BB	BB	AA	AA	AA	BB	BB	AA	BB	AA	AA	BB	AA	BB	BB	AA	AA	AA	AA	AA	BB	AA	BB
IWA6238	wsnp_JD_c9805_10591233	[A/G]	BB	AA	-	AA	AA	-	AA	BB	AA	BB	BB	BB	BB	AA	AA	BB	BB	BB	AA	BB	AA	AA	AA	BB	BB	BB	AA	AA	AA	BB	BB	AA	BB	AA	AA	BB	AA	BB	BB	AA	AA	AA	AA	AA	BB	AA	AA
IWA6288	wsnp_JD_rep_c62949_40140212	[A/C]	BB	AA	BB	BB	AA	BB	BB	BB	BB	AA	BB	BB	BB	BB	BB	AA	BB	AA	BB	BB	AA	BB	AA	BB	AA	BB	AA	BB	AA	AA	AA	BB	AA	BB	AA	BB	-	BB	AA	BB	BB	-	-	BB	AA	BB	AA
IWA6341	wsnp_JG_c3720_1558699	[A/G]	BB	AA	AA	BB	BB	AA	BB	AA	BB	BB	BB	AA	BB	BB	BB	BB	BB	BB	-	BB	BB	AA	AA	BB	AA	-	BB	BB	BB	BB	BB	-	AA	BB	BB	AA	BB	BB	BB	-	AA	BB	AA	AA	BB	BB	BB
IWA6377	wsnp_Ku_c10224_16965872	[T/G]	BB	AA	AA	BB	AA	AA	BB	AA	AA	AA	AA	BB	-	BB	BB	BB	AA	BB	BB	-	AA	AA	BB	BB	BB	BB	BB	BB	BB	BB	BB	AA	AA	BB	BB	BB	BB	AA	AA	BB	AA	BB	-	BB	BB	AA	AA
IWA6395	wsnp_Ku_c10468_17301042	[A/C]	BB	AA	AA	BB	BB	AA	BB	AA	BB	BB	BB	AA	AA	BB	AA	AA	BB	BB	BB	BB	BB	BB	BB	BB	AA	AA	AA	BB	BB	BB	BB	AA	AA	BB	BB	BB	BB	BB	AA	BB	AA	BB	AA	AA	BB	BB	AA
IWA6495	wsnp_Ku_c13381_21349778	[T/C]	BB	AA	BB	BB	AA	BB	BB	AA	-	-	AA	BB	AA	AA	BB	AA	-	AA	BB	-	AA	BB	-	-	AA	AA	AA	BB	BB	AA	AA	AA	AA	AA	AA	-	BB	BB	BB	BB	AA	AA	BB	-	BB	AA	AA
IWA6540	wsnp_Ku_c14803_23225628	[T/C]	BB	AA	AA	BB	AA	AA	BB	AA	AA	AA	AA	BB	-	BB	BB	BB	AA	BB	BB	-	AA	AA	BB	BB	BB	BB	BB	BB	BB	BB	BB	AA	AA	BB	BB	BB	BB	AA	AA	BB	AA	BB	-	BB	BB	AA	AA
IWA6542	wsnp_Ku_c14875_23320708	[A/G]	BB	AA	BB	AA	AA	AA	AA	BB	AA	AA	AA	AA	AA	BB	AA	AA	AA	AA	BB	BB	AA	BB	AA	BB	BB	BB	AA	BB	AA	BB	AA	AA	BB	AA	AA	BB	AA	AA	BB	AA	AA	AA	BB	BB	BB	BB	BB
IWA6547	wsnp_Ku_c15057_23554067	[A/G]	BB	AA	AA	AA	AA	BB	AA	AA	BB	BB	AA	AA	AA	BB	-	BB	-	BB	BB	AA	BB	AA	AA	AA	BB	AA	AA	AA	AA	AA	-	AA	BB	BB	AA	BB	AA	AA	BB	BB	AA	BB	BB	BB	AA	AA	BB
IWA6670	wsnp_Ku_c19251_28705893	[A/G]	BB	AA	AA	AA	BB	BB	AA	AA	AA	AA	BB	AA	BB	BB	BB	BB	AA	AA	BB	BB	AA	BB	BB	BB	BB	BB	AA	AA	AA	AA	AA	BB	AA	BB	BB	AA	BB	AA	AA	AA	BB	BB	AA	BB	BB	BB	BB
IWA6684	wsnp_Ku_c20139_29729256	[T/C]	BB	AA	BB	BB	BB	BB	BB	BB	-	BB	BB	BB	BB	AA	AA	BB	AA	AA	-	BB	BB	AA	AA	BB	BB	AA	AA	AA	BB	BB	BB	AA	BB	AA	AA	BB	BB	AA	BB	BB	BB	BB	BB	AA	BB	BB	AA
IWA6692	wsnp_Ku_c20866_30535489	[A/G]	BB	AA	AA	BB	BB	AA	AA	AA	AA	BB	AA	BB	BB	BB	BB	AA	BB	AA	BB	BB	AA	AA	AA	BB	-	BB	AA	BB	BB	AA	-	AA	BB	BB	BB	BB	BB	-	BB	BB	AA	BB	BB	BB	AA	AA	BB
IWA6716	wsnp_Ku_c217_430915	[T/C]	BB	AA	AA	BB	BB	AA	BB	AA	BB	-	BB	AA	BB	BB	BB	BB	BB	BB	AA	BB	BB	AA	AA	BB	AA	AA	BB	BB	BB	BB	BB	AA	AA	BB	BB	-	BB	BB	BB	BB	AA	BB	AA	AA	BB	BB	BB
IWA6801	wsnp_Ku_c2648_5028958	[T/C]	BB	AA	AA	BB	AA	AA	BB	BB	AA	AA	AA	BB	AA	AA	BB	BB	BB	BB	AA	AA	BB	BB	AA	AA	AA	AA	BB	BB	AA	AA	BB	BB	AA	BB	BB	BB	AA	AA	AA	AA	AA	AA	AA	AA	AA	BB	AA
IWA6816	wsnp_Ku_c27243_37190781	[T/C]	BB	AA	-	BB	-	BB	AA	AA	AA	-	AA	BB	BB	BB	BB	AA	AA	AA	AA	AA	BB	AA	AA	AA	BB	AA	BB	BB	BB	AA	AA	BB	BB	BB	BB	AA	BB	AA	-	AA	AA	BB	AA	BB	BB	AA	-
IWA6845	wsnp_Ku_c28467_38394907	[T/C]	BB	AA	BB	BB	BB	BB	BB	BB	AA	AA	BB	AA	AA	AA	BB	BB	BB	AA	BB	AA	AA	BB	AA	AA	BB	AA	BB	AA	BB	BB	BB	BB	AA	BB	AA	BB	BB	AA	AA	BB	AA	BB	BB	-	AA	AA	BB
IWA7285	wsnp_Ku_c7454_12836140	[A/G]	BB	AA	-	AA	AA	AA	AA	-	AA	-	AA	BB	-	AA	AA	-	BB	-	AA	BB	AA	AA	AA	BB	BB	BB	AA	AA	AA	BB	BB	AA	BB	AA	AA	BB	AA	BB	BB	AA	AA	AA	AA	AA	BB	AA	BB
IWA7310	wsnp_Ku_c8059_13763683	[T/C]	BB	AA	BB	AA	BB	AA	AA	AA	BB	BB	BB	BB	-	AA	BB	BB	AA	BB	AA	-	BB	AA	AA	-	AA	AA	BB	BB	BB	BB	AA	BB	BB	AA	BB	AA	AA	BB	BB	BB	BB	BB	AA	BB	BB	BB	BB
IWA7406	wsnp_Ku_rep_c103889_90513052	[T/C]	BB	AA	AA	AA	AA	BB	AA	AA	AA	AA	BB	AA	BB	BB	BB	BB	AA	AA	BB	BB	AA	BB	AA	AA	AA	-	AA	AA	AA	BB	AA	BB	AA	BB	BB	AA	BB	AA	AA	AA	BB	BB	AA	BB	BB	AA	BB
IWA7409	wsnp_Ku_rep_c104159_90704469	[T/C]	BB	AA	AA	AA	AA	-	AA	AA	BB	AA	BB	AA	BB	BB	BB	BB	AA	AA	BB	BB	BB	BB	AA	AA	AA	-	AA	AA	AA	BB	AA	BB	AA	BB	BB	AA	BB	AA	AA	AA	BB	BB	AA	BB	BB	AA	BB
IWA7495	wsnp_Ku_rep_c71567_71302010	[A/G]	BB	AA	AA	AA	BB	BB	AA	BB	BB	AA	BB	AA	AA	BB	BB	BB	AA	AA	BB	AA	AA	BB	AA	AA	BB	AA	AA	AA	AA	AA	BB	BB	BB	AA	BB	AA	AA	BB	BB	AA	AA	-	AA	BB	AA	AA	BB
IWA7496	wsnp_Ku_rep_c71567_71302046	[T/C]	BB	AA	AA	AA	BB	BB	AA	-	-	AA	BB	AA	AA	BB	-	BB	AA	AA	BB	AA	AA	BB	AA	AA	BB	AA	AA	AA	AA	AA	BB	BB	BB	AA	BB	AA	AA	BB	BB	AA	AA	-	AA	BB	AA	AA	BB
IWA7502	wsnp_Ku_rep_c71785_71517370	[A/G]	BB	AA	AA	BB	BB	AA	AA	AA	AA	BB	-	BB	BB	BB	BB	AA	-	AA	BB	BB	AA	AA	AA	BB	-	BB	AA	BB	BB	AA	-	AA	BB	BB	BB	BB	BB	-	BB	BB	AA	BB	BB	BB	-	-	BB
IWA7520	wsnp_Ku_rep_c73313_72887199	[T/C]	BB	AA	AA	AA	AA	BB	AA	AA	BB	BB	AA	AA	AA	BB	-	BB	BB	AA	AA	AA	BB	AA	-	AA	BB	AA	AA	AA	AA	AA	-	AA	BB	BB	AA	BB	AA	AA	BB	AA	BB	BB	-	BB	AA	AA	BB
IWA7529	wsnp_Ku_rep_c97730_86360387	[A/G]	BB	AA	AA	AA	BB	AA	BB	BB	BB	BB	AA	BB	BB	BB	AA	AA	BB	BB	BB	AA	AA	BB	BB	BB	AA	AA	BB	AA	BB	BB	BB	AA	BB	AA	BB	BB	-	AA	AA	AA	BB	AA	AA	AA	AA	BB	AA
IWA7537	wsnp_Ra_c10536_17322563	[A/G]	BB	AA	BB	BB	AA	BB	BB	AA	BB	BB	AA	BB	AA	AA	BB	AA	BB	AA	BB	AA	AA	BB	AA	-	AA	AA	AA	BB	BB	AA	AA	AA	AA	AA	AA	AA	BB	BB	BB	BB	AA	AA	BB	AA	BB	AA	AA
IWA7560	wsnp_Ra_c11232_18256748	[A/C]	BB	AA	BB	BB	AA	BB	BB	BB	BB	BB	-	BB	BB	AA	AA	BB	AA	AA	AA	BB	BB	AA	AA	BB	BB	AA	AA	AA	BB	BB	BB	AA	BB	AA	AA	BB	BB	AA	-	BB	BB	AA	BB	AA	BB	BB	AA
IWA7657	wsnp_Ra_c16634_25331368	[A/G]	BB	AA	AA	BB	AA	AA	BB	AA	AA	AA	AA	BB	-	BB	BB	BB	AA	BB	BB	-	AA	AA	BB	BB	BB	BB	BB	BB	BB	BB	BB	AA	AA	BB	BB	-	BB	AA	AA	BB	AA	BB	-	BB	BB	AA	AA
IWA7717	wsnp_Ra_c20167_29417876	[T/C]	BB	AA	BB	-	AA	BB	BB	BB	BB	AA	AA	BB	AA	AA	BB	BB	BB	BB	BB	AA	BB	AA	AA	BB	AA	AA	BB	AA	AA	BB	BB	BB	BB	BB	BB	BB	AA	BB	AA	AA	AA	AA	AA	AA	AA	BB	BB
IWA7968	wsnp_Ra_c48124_53475145	[A/G]	BB	AA	AA	AA	BB	BB	BB	BB	BB	BB	AA	AA	AA	BB	BB	AA	-	BB	-	AA	BB	AA	AA	-	AA	BB	AA	BB	BB	AA	AA	BB	BB	AA	AA	BB	AA	AA	AA	AA	AA	BB	BB	BB	BB	BB	BB
IWA8046	wsnp_Ra_c67199_65253620	[T/C]	BB	AA	AA	AA	AA	AA	AA	AA	AA	BB	BB	AA	AA	BB	AA	BB	AA	BB	BB	AA	AA	AA	AA	AA	BB	AA	AA	AA	AA	AA	-	BB	BB	BB	AA	BB	AA	AA	BB	AA	AA	BB	-	BB	AA	AA	BB
IWA8076	wsnp_Ra_c8394_14242358	[T/C]	BB	AA	AA	AA	AA	BB	AA	AA	BB	AA	BB	-	BB	BB	BB	BB	AA	BB	BB	BB	BB	BB	BB	AA	AA	-	AA	AA	AA	BB	AA	BB	AA	BB	BB	AA	BB	AA	AA	AA	BB	BB	AA	BB	AA	AA	BB
IWA8080	wsnp_Ra_c8465_14340896	[A/G]	BB	AA	BB	BB	AA	BB	AA	BB	AA	AA	BB	AA	BB	AA	BB	AA	AA	AA	BB	AA	BB	AA	BB	-	BB	BB	BB	-	BB	BB	AA	AA	BB	BB	-	AA	BB	AA	BB	BB	AA	BB	AA	BB	BB	AA	AA
IWA8091	wsnp_Ra_c8771_14786376	[T/C]	BB	AA	AA	BB	BB	AA	AA	AA	-	AA	BB	BB	AA	-	BB	BB	AA	AA	AA	BB	BB	AA	AA	AA	AA	AA	AA	AA	BB	AA	AA	AA	BB	AA	AA	BB	AA	BB	BB	-	BB	BB	AA	BB	BB	BB	AA
IWA8157	wsnp_Ra_rep_c69398_66825550	[A/G]	BB	AA	BB	BB	BB	BB	BB	BB	AA	AA	BB	AA	AA	AA	BB	BB	BB	AA	BB	AA	AA	AA	AA	AA	BB	BB	BB	AA	BB	BB	BB	-	AA	BB	AA	BB	BB	AA	AA	BB	AA	BB	BB	AA	AA	AA	BB
IWA8208	wsnp_Ra_rep_c79566_75592262	[T/C]	BB	AA	AA	BB	BB	AA	AA	AA	AA	BB	AA	BB	BB	BB	BB	AA	BB	AA	BB	BB	AA	AA	AA	BB	-	BB	AA	BB	BB	AA	-	AA	BB	BB	BB	BB	BB	-	BB	BB	AA	BB	BB	BB	AA	AA	BB
IWA8242	wsnp_RFL_Contig1358_475609	[T/G]	BB	AA	AA	BB	AA	AA	AA	BB	AA	BB	AA	AA	BB	AA	BB	AA	BB	BB	AA	AA	BB	AA	BB	AA	AA	BB	BB	AA	AA	BB	BB	AA	AA	BB	BB	BB	AA	AA	BB	BB	AA	AA	BB	BB	AA	AA	AA
IWA8244	wsnp_RFL_Contig1418_565105	[T/C]	BB	AA	AA	AA	AA	BB	AA	AA	BB	BB	AA	AA	AA	BB	BB	BB	BB	AA	AA	AA	BB	AA	BB	AA	BB	AA	AA	AA	AA	AA	BB	AA	BB	BB	AA	BB	AA	AA	BB	AA	BB	BB	BB	BB	AA	AA	BB
IWA8341	wsnp_RFL_Contig25_2082245	[T/C]	BB	AA	AA	BB	AA	AA	BB	AA	AA	AA	AA	BB	AA	BB	BB	BB	AA	AA	BB	AA	AA	AA	BB	BB	BB	BB	BB	BB	BB	BB	BB	AA	AA	BB	BB	-	BB	AA	AA	BB	AA	BB	BB	BB	AA	AA	AA
IWA8390	wsnp_RFL_Contig2789_2553657	[T/C]	BB	AA	AA	BB	BB	AA	AA	-	AA	BB	AA	BB	BB	AA	BB	BB	BB	AA	BB	BB	AA	AA	BB	BB	BB	AA	BB	BB	BB	BB	AA	BB	-	BB	BB	BB	-	AA	AA	BB	AA	BB	BB	BB	AA	AA	BB
IWA8420	wsnp_RFL_Contig3060_2967139	[T/C]	BB	AA	BB	BB	AA	AA	AA	BB	AA	BB	BB	BB	BB	BB	-	AA	BB	-	BB	AA	AA	BB	-	AA	AA	AA	BB	BB	BB	AA	BB	BB	AA	BB	BB	BB	AA	AA	AA	BB	AA	BB	AA	AA	AA	AA	BB
IWA8461	wsnp_RFL_Contig3352_3456277	[T/C]	BB	AA	BB	BB	BB	AA	AA	AA	AA	AA	AA	BB	BB	AA	BB	BB	-	BB	AA	BB	AA	AA	AA	-	BB	AA	-	-	BB	AA	BB	AA	BB	BB	AA	AA	BB	AA	BB	BB	BB	BB	AA	AA	AA	BB	AA
IWA8480	wsnp_RFL_Contig3529_3696847	[A/G]	BB	AA	AA	AA	AA	AA	AA	-	AA	-	AA	BB	-	AA	AA	-	BB	AA	AA	BB	AA	AA	AA	BB	BB	BB	BB	AA	AA	BB	BB	AA	BB	AA	AA	BB	AA	AA	BB	AA	AA	AA	AA	AA	BB	BB	BB
IWA58	wsnp_BE405519B_Ta_1_1	[T/C]	BB	AA	BB	BB	AA	AA	BB	AA	-	BB	AA	BB	AA	AA	BB	AA	AA	AA	BB	-	AA	BB	-	BB	AA	AA	AA	BB	BB	AA	AA	AA	BB	AA	AA	-	BB	BB	BB	AA	AA	AA	BB	-	BB	AA	AA
IWA186	wsnp_BE446087B_Ta_2_1	[T/C]	BB	AA	-	AA	AA	AA	AA	-	AA	-	AA	BB	-	AA	AA	-	BB	-	AA	BB	AA	AA	AA	BB	BB	BB	AA	AA	AA	BB	BB	AA	BB	AA	AA	BB	AA	BB	BB	AA	AA	AA	AA	AA	BB	AA	BB
IWA501	wsnp_BF483039A_Ta_2_1	[T/C]	BB	AA	AA	AA	BB	AA	AA	AA	AA	BB	BB	AA	-	BB	BB	BB	AA	-	AA	BB	BB	-	AA	BB	BB	AA	AA	AA	AA	-	BB	BB	BB	BB	BB	AA	BB	AA	BB	AA	BB	BB	AA	BB	AA	BB	AA
IWA571	wsnp_BG605258B_Ta_2_7	[T/C]	BB	AA	AA	BB	BB	AA	BB	BB	AA	BB	BB	AA	AA	BB	AA	BB	BB	BB	BB	AA	AA	AA	AA	BB	BB	BB	BB	BB	BB	AA	-	AA	BB	AA	BB	BB	BB	BB	AA	AA	AA	AA	BB	AA	BB	AA	AA
IWA649	wsnp_CAP11_c1116_654975	[A/G]	BB	AA	AA	AA	AA	BB	AA	AA	BB	AA	AA	AA	AA	BB	BB	AA	BB	AA	BB	-	AA	BB	BB	AA	AA	AA	AA	AA	BB	AA	BB	AA	BB	AA	AA	BB	AA	AA	BB	AA	BB	BB	BB	AA	BB	AA	BB
IWA744	wsnp_CAP11_c32_70127	[A/G]	BB	AA	AA	-	AA	BB	AA	AA	BB	BB	AA	BB	AA	BB	AA	-	BB	AA	BB	AA	BB	AA	AA	AA	AA	AA	AA	BB	BB	BB	AA	BB	AA	AA	AA	BB	AA	BB	AA	AA	AA	BB	BB	AA	AA	AA	AA
IWA860	wsnp_CAP11_rep_c4297_2028653	[A/G]	BB	AA	BB	AA	AA	BB	BB	-	AA	AA	BB	BB	AA	AA	AA	BB	-	BB	AA	AA	-	BB	-	AA	BB	BB	BB	AA	AA	BB	BB	AA	AA	AA	BB	BB	AA	BB	BB	BB	BB	AA	BB	BB	BB	BB	AA
IWA970	wsnp_CAP12_c510_276361	[A/G]	BB	AA	BB	BB	BB	BB	BB	BB	AA	AA	BB	AA	AA	AA	BB	BB	BB	AA	BB	AA	AA	AA	AA	AA	BB	BB	BB	AA	BB	BB	BB	BB	AA	BB	AA	BB	BB	AA	AA	BB	AA	BB	BB	AA	AA	AA	BB
IWA1018	wsnp_CAP12_rep_c8723_3660715	[T/C]	BB	AA	BB	BB	-	BB	AA	AA	-	BB	AA	BB	BB	BB	BB	AA	AA	AA	AA	AA	BB	BB	BB	AA	BB	AA	BB	BB	BB	AA	AA	BB	BB	BB	AA	AA	BB	AA	-	AA	AA	BB	AA	AA	BB	AA	AA
IWA1276	wsnp_Ex_c10087_16579529	[A/G]	BB	AA	BB	BB	AA	BB	AA	BB	BB	AA	BB	BB	BB	AA	BB	AA	-	AA	BB	BB	AA	BB	AA	BB	AA	BB	AA	AA	AA	AA	AA	BB	AA	BB	AA	BB	BB	BB	AA	BB	AA	BB	-	BB	AA	AA	AA
IWA1376	wsnp_Ex_c10657_17376448	[A/C]	BB	AA	AA	AA	BB	BB	BB	BB	BB	BB	AA	AA	BB	BB	BB	AA	BB	BB	BB	AA	BB	AA	AA	AA	AA	BB	AA	BB	BB	AA	BB	AA	BB	AA	AA	BB	AA	AA	AA	AA	AA	BB	BB	BB	BB	BB	BB
IWA1380	wsnp_Ex_c10674_17400603	[T/C]	BB	AA	BB	BB	AA	BB	AA	AA	-	BB	AA	BB	BB	BB	BB	AA	AA	AA	AA	AA	BB	BB	BB	AA	BB	AA	BB	BB	BB	AA	AA	BB	BB	BB	BB	AA	BB	AA	AA	AA	AA	BB	AA	AA	BB	AA	AA
IWA1577	wsnp_Ex_c12048_19288999	[T/C]	BB	AA	AA	AA	BB	-	AA	BB	AA	AA	BB	AA	BB	AA	BB	AA	AA	AA	-	AA	AA	AA	BB	BB	BB	BB	BB	AA	BB	BB	AA	AA	BB	BB	BB	AA	BB	BB	BB	AA	AA	AA	AA	BB	BB	AA	BB
IWA2318	wsnp_Ex_c18503_27349536	[T/C]	BB	AA	AA	BB	AA	BB	BB	BB	BB	BB	BB	AA	AA	BB	-	BB	-	BB	BB	BB	-	AA	BB	BB	BB	BB	BB	AA	BB	BB	-	AA	BB	BB	AA	BB	AA	AA	BB	BB	-	BB	BB	BB	BB	AA	AA
IWA3504	wsnp_Ex_c34975_43204180	[T/C]	BB	AA	-	AA	AA	AA	AA	-	-	-	AA	-	-	AA	AA	-	BB	AA	AA	BB	AA	AA	AA	BB	BB	BB	BB	AA	AA	BB	BB	AA	BB	AA	AA	BB	AA	AA	BB	AA	AA	AA	AA	AA	BB	BB	BB
IWA4959	wsnp_Ex_c9750_16105678	[T/C]	BB	AA	BB	BB	AA	AA	BB	AA	AA	AA	BB	AA	AA	AA	AA	AA	AA	BB	AA	AA	AA	AA	AA	AA	AA	-	AA	AA	AA	AA	AA	-	AA	AA	AA	AA	BB	BB	AA	BB	BB	BB	AA	AA	AA	AA	AA
IWA71	wsnp_BE406351A_Ta_2_3	[T/C]	BB	AA	BB	BB	AA	BB	AA	BB	AA	BB	BB	BB	BB	BB	-	AA	BB	AA	BB	AA	AA	BB	AA	AA	AA	AA	BB	AA	BB	AA	BB	BB	AA	AA	BB	BB	AA	AA	BB	AA	AA	-	BB	AA	AA	BB	BB
IWA94	wsnp_BE426418A_Ta_2_1	[T/C]	BB	AA	-	BB	BB	AA	BB	AA	BB	BB	BB	BB	BB	BB	BB	BB	BB	BB	AA	-	BB	AA	BB	BB	AA	AA	-	BB	BB	BB	BB	-	AA	BB	BB	AA	BB	BB	AA	BB	AA	BB	AA	AA	BB	BB	BB
IWA164	wsnp_BE445121A_Ta_1_8	[A/C]	BB	AA	BB	BB	BB	-	AA	AA	BB	BB	-	BB	-	BB	BB	BB	BB	AA	AA	AA	AA	AA	BB	BB	BB	AA	AA	BB	AA	AA	BB	BB	AA	AA	AA	AA	AA	-	AA	AA	AA	BB	-	AA	BB	AA	BB
IWA187	wsnp_BE446161B_Td_2_2	[A/G]	BB	AA	BB	BB	AA	BB	BB	AA	-	-	AA	BB	AA	AA	BB	AA	-	AA	BB	AA	AA	BB	-	-	AA	AA	AA	AA	BB	AA	AA	AA	AA	AA	AA	-	BB	BB	BB	BB	AA	AA	BB	-	BB	AA	AA
IWA265	wsnp_BE495277B_Ta_2_5	[T/C]	BB	AA	BB	BB	AA	BB	AA	AA	-	BB	AA	BB	BB	BB	BB	AA	AA	AA	AA	AA	BB	BB	BB	AA	BB	AA	BB	BB	BB	AA	AA	BB	BB	BB	AA	AA	BB	AA	-	AA	AA	BB	AA	AA	BB	AA	AA
IWA427	wsnp_BF201830B_Ta_1_2	[T/C]	BB	AA	AA	-	AA	BB	BB	AA	BB	BB	AA	AA	AA	BB	AA	BB	-	BB	AA	AA	-	AA	-	AA	BB	BB	BB	AA	AA	AA	BB	AA	BB	BB	AA	BB	AA	AA	BB	AA	-	BB	BB	BB	BB	AA	AA
IWA449	wsnp_BF293181B_Ta_2_1	[A/G]	BB	AA	BB	-	BB	BB	AA	AA	BB	AA	AA	BB	AA	BB	AA	-	BB	AA	BB	AA	BB	BB	AA	BB	AA	AA	AA	AA	BB	BB	-	AA	AA	BB	AA	BB	AA	BB	AA	AA	AA	BB	BB	AA	BB	AA	AA
IWA466	wsnp_BF473056D_Ta_2_1	[A/G]	BB	AA	AA	BB	BB	BB	BB	BB	-	AA	BB	BB	BB	AA	BB	AA	AA	AA	-	BB	BB	BB	AA	BB	BB	AA	AA	AA	BB	BB	BB	AA	BB	AA	AA	BB	BB	-	AA	BB	BB	AA	BB	AA	BB	AA	AA
IWA471	wsnp_BF473825A_Ta_1_4	[A/G]	BB	AA	BB	AA	BB	AA	BB	BB	BB	AA	AA	-	BB	AA	BB	BB	AA	AA	-	BB	AA	BB	BB	AA	BB	AA	AA	BB	BB	BB	AA	BB	-	BB	BB	BB	AA	AA	BB	BB	BB	BB	AA	BB	AA	AA	BB
IWA502	wsnp_BF483039A_Ta_2_3	[T/C]	BB	AA	AA	AA	BB	AA	AA	AA	AA	BB	BB	AA	-	BB	BB	BB	AA	-	AA	BB	BB	-	AA	BB	BB	AA	AA	AA	AA	BB	BB	BB	BB	BB	BB	AA	BB	AA	BB	AA	BB	BB	AA	BB	AA	BB	AA
IWA518	wsnp_BF485380B_Ta_2_1	[A/G]	BB	AA	AA	-	AA	BB	BB	AA	BB	BB	BB	BB	BB	BB	AA	-	BB	BB	BB	BB	BB	AA	AA	AA	BB	AA	AA	BB	AA	BB	AA	BB	AA	BB	AA	BB	AA	BB	AA	AA	AA	AA	BB	AA	AA	AA	AA
IWA664	wsnp_CAP11_c1244_714229	[A/G]	BB	AA	BB	BB	AA	BB	BB	BB	BB	AA	BB	BB	BB	BB	BB	AA	BB	AA	BB	BB	AA	BB	AA	BB	AA	BB	AA	BB	AA	AA	AA	BB	AA	BB	AA	BB	-	BB	AA	BB	BB	-	BB	BB	AA	BB	AA
IWA697	wsnp_CAP11_c1956_1045077	[A/G]	BB	AA	AA	-	AA	BB	AA	AA	BB	BB	AA	AA	AA	-	-	BB	BB	AA	AA	AA	BB	AA	-	AA	BB	AA	AA	AA	AA	AA	BB	AA	BB	BB	AA	BB	AA	AA	BB	AA	-	BB	BB	BB	AA	AA	BB
IWA865	wsnp_CAP11_rep_c4346_2050918	[A/G]	BB	AA	AA	AA	BB	AA	AA	AA	AA	BB	BB	AA	-	BB	BB	BB	AA	-	BB	BB	AA	AA	AA	BB	BB	AA	AA	AA	AA	AA	AA	BB	BB	BB	BB	AA	BB	AA	BB	AA	BB	BB	AA	BB	AA	BB	AA
IWA919	wsnp_CAP12_c1337_682282	[T/C]	BB	AA	BB	BB	BB	AA	AA	AA	AA	AA	AA	BB	BB	AA	BB	BB	-	BB	AA	BB	AA	AA	AA	-	BB	AA	-	-	BB	AA	BB	AA	BB	BB	AA	AA	BB	AA	BB	BB	BB	BB	AA	AA	AA	BB	AA
IWA1032	wsnp_CAP7_c1321_664480	[T/C]	BB	AA	AA	AA	AA	BB	AA	AA	BB	AA	BB	AA	BB	BB	BB	BB	AA	AA	BB	BB	AA	BB	AA	AA	AA	-	AA	AA	AA	BB	AA	BB	AA	BB	BB	AA	BB	AA	AA	AA	BB	BB	AA	BB	BB	AA	BB
IWA1176	wsnp_CAP8_c2693_1401039	[A/G]	BB	AA	-	BB	-	BB	AA	AA	AA	-	AA	BB	BB	BB	BB	AA	AA	AA	AA	AA	BB	AA	AA	AA	BB	AA	BB	BB	BB	AA	AA	BB	BB	BB	BB	AA	BB	AA	-	AA	AA	BB	AA	BB	BB	AA	-
IWA1182	wsnp_CAP8_c3593_1773371	[T/C]	BB	AA	AA	-	AA	BB	AA	AA	BB	BB	AA	BB	AA	BB	AA	-	BB	AA	BB	AA	BB	AA	AA	AA	AA	AA	AA	BB	BB	BB	AA	BB	AA	AA	AA	BB	AA	BB	AA	AA	AA	BB	BB	AA	AA	AA	AA
IWA5	wsnp_be352570B_Ta_2_2	[T/C]	BB	AA	AA	-	AA	BB	AA	AA	BB	BB	AA	BB	AA	BB	AA	-	BB	AA	BB	AA	BB	AA	AA	AA	AA	AA	AA	BB	BB	BB	AA	BB	AA	AA	AA	BB	AA	BB	AA	AA	AA	BB	BB	AA	AA	AA	AA
IWA568	wsnp_BG604678A_Ta_1_2	[A/C]	BB	AA	AA	BB	AA	AA	BB	AA	AA	-	AA	BB	-	BB	-	BB	AA	AA	BB	-	-	AA	BB	BB	BB	BB	BB	BB	BB	BB	BB	AA	AA	BB	BB	BB	BB	AA	BB	BB	AA	BB	BB	BB	AA	AA	AA
IWA610	wsnp_BQ159467B_Ta_2_1	[T/C]	BB	AA	-	AA	AA	AA	AA	-	-	-	AA	-	-	AA	AA	-	BB	AA	BB	BB	AA	AA	AA	BB	BB	BB	BB	AA	AA	AA	BB	AA	BB	AA	AA	BB	AA	AA	BB	AA	AA	AA	AA	AA	BB	BB	BB
IWA611	wsnp_BQ159467B_Ta_2_2	[T/C]	BB	AA	-	AA	AA	AA	AA	-	BB	-	AA	-	-	AA	AA	BB	BB	AA	BB	BB	AA	AA	AA	BB	BB	BB	BB	AA	AA	AA	BB	AA	BB	AA	AA	BB	AA	AA	BB	AA	AA	AA	AA	AA	BB	BB	BB
IWA735	wsnp_CAP11_c29_68486	[T/G]	BB	AA	AA	BB	BB	AA	BB	AA	AA	BB	BB	BB	BB	BB	AA	AA	BB	AA	AA	BB	AA	BB	AA	AA	BB	-	AA	BB	AA	AA	AA	AA	AA	AA	BB	AA	BB	BB	BB	BB	AA	BB	AA	AA	BB	BB	BB
IWA1036	wsnp_CAP7_c1453_728076	[A/G]	BB	AA	AA	-	AA	BB	BB	AA	BB	BB	AA	AA	AA	-	-	BB	-	BB	AA	AA	-	AA	-	AA	BB	BB	BB	AA	AA	AA	BB	AA	BB	BB	AA	BB	AA	AA	BB	AA	-	BB	-	BB	BB	AA	BB
IWA1097	wsnp_CAP7_c5487_2464864	[A/C]	BB	AA	AA	AA	BB	BB	AA	-	-	AA	BB	AA	AA	BB	-	BB	AA	AA	BB	AA	AA	BB	AA	AA	BB	AA	AA	AA	AA	AA	BB	BB	BB	AA	BB	AA	AA	BB	BB	AA	AA	-	AA	BB	AA	AA	BB
IWA1137	wsnp_CAP8_c1013_646748	[A/G]	BB	AA	AA	BB	AA	AA	BB	BB	AA	BB	AA	BB	BB	AA	BB	BB	AA	BB	AA	AA	AA	AA	BB	BB	BB	BB	BB	BB	BB	BB	AA	AA	AA	BB	BB	BB	AA	AA	BB	AA	AA	BB	BB	BB	AA	AA	AA
IWA1187	wsnp_CAP8_c432_354498	[T/C]	BB	AA	BB	AA	AA	AA	BB	AA	AA	BB	AA	AA	BB	BB	AA	BB	BB	AA	BB	BB	AA	AA	BB	BB	BB	BB	BB	AA	AA	BB	BB	AA	BB	AA	BB	BB	BB	BB	BB	AA	BB	AA	AA	AA	BB	BB	AA
IWA1270	wsnp_Ex_c10014_16477392	[A/C]	BB	AA	AA	BB	BB	AA	BB	BB	AA	AA	AA	BB	BB	BB	BB	-	AA	BB	AA	AA	AA	AA	AA	AA	AA	AA	BB	AA	AA	BB	BB	BB	BB	BB	BB	BB	BB	BB	BB	AA	AA	AA	AA	AA	AA	AA	BB
IWA1339	wsnp_Ex_c10500_17163855	[A/G]	BB	AA	BB	AA	BB	BB	AA	AA	BB	AA	AA	BB	AA	AA	AA	BB	AA	AA	BB	AA	BB	AA	AA	BB	AA	AA	AA	AA	BB	BB	-	BB	AA	AA	BB	BB	AA	BB	AA	BB	AA	AA	AA	AA	BB	BB	AA
IWA1341	wsnp_Ex_c10527_17198865	[T/G]	BB	AA	AA	BB	AA	AA	BB	AA	AA	AA	AA	BB	-	BB	BB	BB	AA	BB	BB	-	AA	AA	BB	BB	BB	BB	BB	BB	BB	BB	BB	AA	AA	BB	BB	-	BB	AA	AA	BB	AA	BB	AA	BB	BB	AA	AA
IWA1374	wsnp_Ex_c10644_17356566	[A/C]	BB	AA	BB	BB	AA	BB	AA	AA	-	BB	AA	BB	BB	BB	BB	AA	AA	AA	AA	AA	BB	BB	BB	AA	BB	AA	BB	BB	BB	AA	AA	BB	BB	BB	AA	AA	BB	AA	-	AA	AA	BB	AA	AA	BB	AA	AA
IWA1390	wsnp_Ex_c10818_17605541	[T/C]	BB	AA	BB	AA	BB	AA	AA	AA	BB	BB	BB	BB	BB	AA	BB	BB	AA	BB	AA	BB	BB	AA	AA	-	AA	AA	BB	BB	BB	BB	AA	BB	BB	AA	BB	AA	AA	BB	BB	BB	BB	BB	AA	BB	BB	BB	BB
IWA1424	wsnp_Ex_c11047_17915103	[T/C]	BB	AA	AA	AA	AA	-	AA	AA	BB	AA	BB	AA	BB	BB	BB	BB	AA	AA	BB	BB	BB	BB	AA	AA	AA	AA	AA	AA	AA	BB	AA	BB	AA	BB	BB	AA	BB	AA	AA	AA	BB	-	AA	BB	BB	AA	BB
IWA1425	wsnp_Ex_c11047_17915225	[T/C]	BB	AA	AA	AA	AA	-	AA	AA	BB	AA	BB	AA	BB	BB	BB	BB	AA	AA	BB	BB	BB	BB	AA	AA	AA	AA	AA	AA	AA	BB	AA	BB	AA	BB	BB	AA	BB	AA	AA	AA	BB	-	AA	BB	BB	AA	BB
IWA1457	wsnp_Ex_c11229_18163892	[T/C]	BB	AA	AA	BB	BB	AA	BB	AA	BB	BB	BB	AA	BB	BB	BB	BB	AA	AA	AA	BB	BB	AA	AA	BB	AA	AA	BB	BB	BB	BB	BB	AA	AA	BB	BB	BB	BB	BB	BB	-	AA	BB	AA	AA	BB	BB	BB
IWA1495	wsnp_Ex_c1143_2196102	[A/G]	BB	AA	BB	AA	AA	BB	BB	-	AA	BB	BB	BB	AA	AA	AA	BB	AA	BB	AA	AA	AA	BB	AA	AA	BB	BB	BB	AA	AA	BB	BB	AA	AA	AA	BB	BB	AA	BB	BB	BB	BB	AA	BB	-	BB	BB	AA
IWA1511	wsnp_Ex_c11560_18632698	[A/G]	BB	AA	AA	BB	BB	AA	AA	AA	-	AA	BB	AA	AA	BB	BB	BB	AA	-	AA	BB	BB	AA	BB	AA	AA	AA	AA	-	BB	AA	AA	AA	BB	AA	-	BB	AA	BB	BB	-	AA	BB	AA	BB	AA	BB	BB
IWA1560	wsnp_Ex_c11939_19147790	[T/C]	BB	AA	AA	BB	BB	AA	BB	AA	AA	BB	AA	AA	BB	BB	AA	AA	BB	AA	AA	AA	AA	BB	BB	AA	BB	BB	BB	AA	AA	BB	AA	BB	AA	AA	BB	BB	AA	AA	BB	AA	AA	AA	AA	AA	AA	-	AA
IWA1584	wsnp_Ex_c12119_19382764	[T/C]	BB	AA	-	BB	-	BB	AA	AA	BB	-	AA	BB	BB	BB	BB	AA	AA	AA	AA	AA	BB	BB	AA	AA	BB	AA	BB	BB	BB	AA	AA	BB	BB	BB	BB	AA	BB	AA	-	AA	AA	BB	AA	BB	BB	AA	-
IWA1642	wsnp_Ex_c12535_19963035	[A/G]	BB	AA	AA	BB	BB	BB	AA	AA	BB	BB	AA	BB	AA	BB	AA	BB	BB	AA	BB	AA	BB	BB	AA	AA	AA	AA	AA	BB	BB	BB	AA	BB	AA	AA	AA	BB	AA	BB	AA	AA	AA	BB	BB	AA	AA	AA	AA
IWA1726	wsnp_Ex_c1309_2503198	[A/G]	BB	AA	AA	AA	AA	-	AA	AA	BB	AA	BB	AA	BB	BB	BB	BB	AA	AA	BB	BB	BB	BB	AA	AA	AA	-	AA	AA	AA	BB	AA	BB	AA	BB	BB	AA	BB	AA	AA	AA	BB	-	AA	BB	BB	AA	BB
IWA1765	wsnp_Ex_c13353_21046550	[A/G]	BB	AA	AA	BB	AA	BB	BB	BB	BB	AA	BB	AA	BB	BB	BB	BB	BB	BB	BB	BB	BB	AA	-	-	BB	AA	BB	BB	BB	BB	AA	BB	BB	BB	AA	BB	AA	AA	BB	AA	-	-	AA	BB	AA	BB	BB
IWA1793	wsnp_Ex_c13615_21393638	[A/G]	BB	AA	AA	BB	AA	AA	BB	AA	AA	AA	AA	BB	AA	BB	BB	BB	AA	AA	BB	AA	AA	AA	BB	BB	BB	BB	BB	BB	BB	BB	BB	AA	AA	BB	BB	-	BB	AA	AA	BB	AA	BB	BB	BB	AA	AA	AA
IWA1805	wsnp_Ex_c13735_21548067	[A/G]	BB	AA	AA	BB	BB	AA	AA	AA	AA	BB	AA	BB	BB	AA	BB	BB	BB	AA	BB	BB	AA	BB	BB	BB	BB	AA	BB	BB	BB	BB	AA	BB	-	BB	BB	BB	-	AA	AA	BB	AA	BB	BB	BB	BB	AA	BB
IWA1839	wsnp_Ex_c1398_2677127	[A/G]	BB	AA	AA	-	AA	AA	BB	AA	AA	AA	AA	AA	AA	AA	AA	AA	AA	BB	AA	AA	AA	AA	AA	AA	AA	-	AA	AA	AA	-	AA	-	AA	AA	AA	AA	BB	AA	AA	AA	BB	AA	AA	AA	-	AA	AA
IWA1867	wsnp_Ex_c14156_22088738	[T/C]	BB	AA	AA	AA	BB	BB	AA	BB	BB	AA	BB	AA	AA	BB	BB	BB	AA	AA	BB	AA	AA	BB	AA	AA	BB	AA	AA	AA	AA	AA	BB	BB	BB	AA	BB	AA	AA	BB	BB	AA	AA	-	AA	BB	AA	AA	BB
IWA1874	wsnp_Ex_c14192_22135363	[T/C]	BB	AA	BB	BB	AA	BB	AA	BB	BB	AA	BB	BB	BB	AA	BB	AA	-	AA	BB	BB	AA	BB	AA	BB	AA	BB	AA	AA	AA	AA	AA	BB	AA	BB	AA	BB	BB	BB	AA	BB	AA	BB	-	BB	AA	AA	AA
IWA1875	wsnp_Ex_c14192_22135384	[T/C]	BB	AA	BB	BB	AA	BB	AA	BB	BB	AA	BB	BB	BB	AA	BB	AA	-	AA	BB	BB	AA	BB	AA	BB	AA	BB	AA	AA	AA	AA	AA	BB	AA	BB	AA	BB	BB	BB	AA	BB	AA	BB	-	BB	AA	AA	AA
IWA1898	wsnp_Ex_c14462_22457559	[T/C]	BB	AA	-	AA	AA	AA	AA	-	BB	BB	AA	-	-	AA	AA	BB	BB	AA	AA	BB	AA	AA	AA	BB	BB	BB	BB	AA	AA	AA	BB	AA	BB	AA	AA	BB	AA	AA	BB	AA	AA	AA	AA	AA	BB	BB	BB
IWA1919	wsnp_Ex_c14641_22698595	[A/G]	BB	AA	AA	BB	AA	AA	BB	AA	AA	AA	AA	BB	-	BB	-	BB	AA	BB	BB	-	AA	AA	BB	BB	BB	BB	BB	BB	BB	BB	BB	AA	AA	BB	BB	-	BB	AA	AA	BB	AA	BB	-	BB	-	AA	AA
IWA1961	wsnp_Ex_c14962_23115336	[T/G]	BB	AA	BB	BB	AA	BB	BB	AA	-	-	AA	BB	AA	AA	BB	AA	-	AA	BB	-	AA	BB	-	-	AA	AA	AA	BB	BB	AA	AA	AA	AA	AA	AA	-	BB	BB	BB	BB	AA	AA	BB	-	BB	AA	AA
IWA2112	wsnp_Ex_c1629_3104356	[T/C]	BB	AA	BB	BB	AA	BB	AA	BB	AA	BB	BB	AA	AA	BB	AA	BB	BB	AA	BB	AA	AA	AA	BB	BB	AA	-	AA	AA	AA	BB	AA	AA	AA	BB	AA	AA	AA	BB	BB	AA	AA	-	BB	BB	AA	AA	BB
IWA2113	wsnp_Ex_c16295_24772663	[T/C]	BB	AA	AA	BB	AA	AA	BB	AA	BB	AA	BB	BB	BB	AA	BB	AA	BB	AA	BB	BB	AA	AA	AA	AA	AA	BB	AA	AA	BB	AA	BB	AA	BB	BB	BB	BB	AA	AA	BB	AA	AA	BB	AA	BB	BB	AA	AA
IWA2134	wsnp_Ex_c16446_24946990	[T/C]	BB	AA	AA	AA	AA	AA	BB	AA	AA	AA	AA	AA	AA	AA	AA	AA	AA	BB	AA	AA	AA	AA	AA	AA	AA	-	AA	AA	AA	AA	AA	AA	AA	AA	AA	AA	BB	AA	AA	AA	BB	AA	AA	AA	-	AA	AA
IWA2148	wsnp_Ex_c16569_25082817	[A/G]	BB	AA	AA	BB	BB	AA	BB	AA	BB	-	BB	AA	BB	BB	BB	BB	BB	BB	AA	BB	BB	AA	AA	BB	AA	AA	BB	BB	BB	BB	BB	AA	AA	BB	BB	-	BB	BB	BB	-	AA	BB	AA	AA	BB	BB	BB
IWA2155	wsnp_Ex_c16611_25142774	[T/C]	BB	AA	BB	BB	AA	BB	BB	AA	-	-	AA	BB	AA	AA	BB	AA	-	AA	BB	-	AA	BB	-	-	AA	AA	AA	BB	BB	AA	AA	AA	AA	AA	AA	-	BB	BB	BB	BB	AA	AA	BB	-	BB	AA	AA
IWA2181	wsnp_Ex_c16963_25554400	[A/G]	BB	AA	BB	BB	-	BB	AA	AA	BB	BB	AA	BB	BB	BB	BB	AA	AA	AA	AA	AA	BB	BB	BB	AA	BB	AA	BB	BB	BB	AA	AA	BB	BB	BB	BB	AA	BB	AA	-	AA	AA	BB	AA	AA	BB	AA	AA
IWA2244	wsnp_Ex_c17667_26408733	[T/C]	BB	AA	AA	AA	AA	AA	BB	BB	AA	AA	AA	AA	AA	AA	AA	AA	AA	BB	AA	AA	AA	AA	AA	AA	AA	-	AA	AA	AA	AA	AA	AA	AA	AA	AA	AA	BB	AA	AA	AA	BB	AA	AA	AA	BB	AA	AA
IWA2272	wsnp_Ex_c1790_3378771	[T/G]	BB	AA	AA	-	BB	BB	AA	AA	BB	BB	AA	BB	AA	BB	AA	-	BB	AA	BB	AA	BB	BB	AA	AA	AA	AA	AA	BB	BB	BB	AA	BB	AA	AA	AA	BB	AA	BB	AA	AA	AA	BB	BB	AA	AA	AA	AA
IWA2369	wsnp_Ex_c19_39269	[A/G]	BB	AA	BB	-	AA	AA	BB	BB	BB	AA	AA	BB	AA	AA	AA	BB	BB	BB	BB	AA	BB	AA	AA	BB	AA	AA	BB	AA	BB	BB	BB	BB	BB	BB	AA	BB	AA	BB	AA	AA	BB	AA	AA	AA	BB	BB	BB
IWA2426	wsnp_Ex_c19516_28482852	[A/G]	BB	AA	AA	BB	BB	AA	AA	AA	-	AA	BB	AA	AA	-	BB	BB	AA	-	AA	BB	BB	AA	BB	AA	AA	AA	AA	-	BB	AA	AA	AA	BB	AA	-	BB	AA	BB	BB	-	AA	BB	AA	BB	AA	BB	BB
IWA2450	wsnp_Ex_c1970_3707739	[T/C]	BB	AA	AA	BB	BB	AA	BB	AA	AA	AA	AA	AA	AA	BB	AA	AA	BB	AA	AA	AA	AA	BB	AA	AA	BB	BB	BB	AA	AA	BB	AA	BB	AA	AA	AA	AA	AA	AA	BB	AA	AA	AA	AA	AA	AA	-	BB
IWA2479	wsnp_Ex_c1988_3742291	[A/G]	BB	AA	BB	AA	AA	BB	BB	-	AA	BB	BB	BB	AA	AA	AA	BB	-	BB	AA	AA	-	BB	-	AA	BB	BB	-	AA	AA	BB	BB	AA	AA	AA	BB	BB	AA	BB	BB	BB	BB	AA	BB	-	BB	BB	AA
IWA2596	wsnp_Ex_c2132_4004831	[A/G]	BB	AA	-	-	-	BB	AA	AA	AA	-	AA	BB	BB	BB	BB	AA	AA	AA	AA	AA	BB	BB	AA	AA	BB	AA	BB	BB	BB	AA	AA	BB	BB	BB	BB	AA	BB	AA	-	AA	AA	BB	AA	BB	BB	AA	-
IWA2645	wsnp_Ex_c2171_4073721	[T/C]	BB	AA	AA	BB	AA	BB	BB	BB	BB	BB	AA	AA	AA	BB	BB	BB	BB	-	BB	BB	AA	BB	BB	AA	BB	BB	AA	BB	BB	BB	BB	BB	BB	AA	AA	BB	BB	AA	BB	AA	BB	BB	BB	AA	BB	AA	BB
IWA2732	wsnp_Ex_c22648_31848819	[T/C]	BB	AA	BB	BB	AA	BB	BB	AA	-	-	AA	BB	AA	AA	BB	AA	-	AA	BB	-	AA	BB	-	-	AA	AA	AA	BB	BB	AA	AA	AA	AA	AA	AA	-	BB	BB	BB	BB	AA	AA	BB	-	BB	AA	AA
IWA2818	wsnp_Ex_c23598_32826926	[A/G]	BB	AA	AA	BB	BB	AA	BB	AA	AA	AA	AA	AA	AA	BB	AA	AA	BB	AA	AA	AA	AA	BB	AA	AA	BB	BB	BB	AA	AA	BB	AA	BB	AA	AA	AA	AA	AA	AA	BB	BB	AA	AA	BB	AA	AA	-	BB
IWA2923	wsnp_Ex_c24700_33953160	[T/C]	BB	AA	BB	BB	BB	BB	-	BB	-	BB	BB	BB	BB	AA	AA	BB	AA	AA	-	BB	BB	AA	AA	BB	BB	AA	AA	AA	BB	BB	BB	AA	BB	AA	AA	BB	BB	AA	AA	BB	BB	BB	BB	AA	BB	BB	AA
IWA2993	wsnp_Ex_c2573_4788116	[T/C]	BB	AA	AA	BB	BB	BB	BB	BB	-	BB	BB	BB	BB	BB	BB	BB	AA	BB	AA	AA	AA	-	AA	AA	AA	AA	-	AA	BB	BB	BB	BB	-	BB	BB	BB	AA	AA	AA	AA	AA	BB	BB	AA	AA	AA	AA
IWA3051	wsnp_Ex_c26509_35755018	[T/C]	BB	AA	AA	AA	AA	BB	AA	AA	BB	AA	AA	-	BB	BB	BB	BB	AA	BB	BB	BB	AA	BB	BB	AA	AA	-	AA	BB	AA	BB	AA	BB	AA	BB	BB	AA	AA	AA	AA	AA	BB	BB	AA	BB	AA	AA	BB
IWA3194	wsnp_Ex_c2887_5330787	[T/C]	BB	AA	BB	BB	AA	AA	AA	BB	AA	BB	BB	BB	BB	BB	AA	AA	BB	AA	BB	AA	AA	BB	-	AA	AA	AA	BB	BB	BB	AA	BB	BB	AA	BB	BB	BB	AA	AA	AA	BB	AA	BB	AA	AA	AA	AA	BB
IWA3198	wsnp_Ex_c28930_38008757	[T/C]	BB	AA	AA	BB	AA	AA	BB	AA	AA	BB	AA	AA	AA	BB	AA	AA	BB	BB	BB	BB	BB	BB	BB	AA	BB	AA	BB	AA	BB	BB	AA	AA	BB	AA	AA	BB	AA	AA	AA	BB	BB	AA	BB	BB	AA	AA	AA
IWA3297	wsnp_Ex_c30813_39686103	[T/C]	BB	AA	BB	AA	AA	BB	BB	AA	AA	AA	BB	BB	AA	AA	AA	BB	AA	BB	AA	AA	AA	BB	AA	AA	BB	BB	BB	AA	AA	-	BB	AA	AA	AA	BB	BB	AA	BB	BB	BB	-	AA	BB	BB	BB	BB	AA
IWA3311	wsnp_Ex_c31006_39850673	[A/G]	BB	AA	AA	BB	AA	AA	BB	AA	AA	AA	AA	BB	-	BB	-	BB	AA	BB	BB	-	AA	AA	BB	BB	BB	BB	BB	BB	BB	BB	BB	AA	AA	BB	BB	-	BB	AA	AA	BB	AA	BB	AA	BB	BB	AA	AA
IWA3360	wsnp_Ex_c3175_5864594	[T/C]	BB	AA	AA	AA	BB	AA	AA	BB	BB	BB	AA	BB	BB	AA	BB	BB	AA	AA	AA	-	BB	AA	AA	AA	AA	AA	BB	BB	BB	BB	AA	BB	BB	AA	BB	AA	AA	BB	BB	BB	BB	BB	AA	BB	BB	BB	BB
IWA3409	wsnp_Ex_c3264_6017750	[T/C]	BB	AA	AA	BB	BB	AA	BB	AA	AA	AA	AA	AA	AA	BB	AA	AA	BB	AA	AA	AA	AA	BB	AA	AA	BB	BB	BB	AA	AA	BB	AA	BB	AA	AA	AA	AA	AA	AA	BB	AA	AA	AA	AA	AA	AA	-	BB
IWA3468	wsnp_Ex_c342_670243	[T/G]	BB	AA	AA	BB	BB	AA	AA	AA	BB	AA	BB	BB	AA	BB	BB	BB	AA	AA	AA	BB	BB	AA	AA	AA	AA	AA	AA	BB	BB	AA	AA	AA	BB	AA	BB	BB	AA	BB	BB	BB	BB	BB	AA	BB	BB	BB	-
IWA3469	wsnp_Ex_c342_670415	[A/G]	BB	AA	AA	BB	BB	AA	AA	AA	BB	AA	BB	BB	AA	BB	BB	BB	AA	AA	AA	BB	BB	AA	AA	AA	AA	AA	AA	BB	BB	AA	AA	AA	BB	AA	BB	BB	AA	BB	BB	BB	BB	BB	AA	BB	BB	BB	-
IWA3515	wsnp_Ex_c35195_43389213	[T/C]	BB	AA	AA	-	AA	AA	AA	AA	AA	BB	BB	AA	AA	BB	-	BB	-	BB	BB	AA	BB	AA	AA	AA	BB	AA	AA	AA	-	AA	-	BB	BB	BB	AA	BB	AA	AA	BB	AA	AA	BB	-	BB	AA	AA	BB
IWA3539	wsnp_Ex_c35742_43830556	[T/C]	BB	AA	AA	-	AA	BB	BB	AA	BB	BB	BB	BB	BB	BB	AA	BB	BB	BB	BB	BB	BB	AA	AA	AA	BB	AA	AA	BB	AA	BB	AA	BB	AA	BB	AA	BB	AA	BB	AA	AA	AA	AA	BB	AA	AA	AA	AA
IWA3542	wsnp_Ex_c35839_43909849	[T/C]	BB	AA	AA	BB	AA	AA	BB	AA	AA	AA	AA	BB	AA	BB	-	BB	AA	BB	BB	AA	AA	AA	BB	BB	BB	BB	BB	BB	BB	BB	BB	AA	AA	BB	BB	-	BB	AA	AA	BB	AA	BB	AA	BB	-	AA	AA
IWA3713	wsnp_Ex_c402_791233	[A/G]	BB	AA	BB	BB	AA	BB	BB	BB	-	BB	BB	BB	BB	AA	AA	BB	AA	AA	AA	BB	BB	AA	BB	AA	BB	AA	AA	AA	AA	BB	BB	AA	BB	AA	AA	BB	BB	AA	-	BB	BB	AA	BB	AA	BB	BB	AA
IWA3886	wsnp_Ex_c4408_7939986	[A/G]	BB	AA	AA	-	BB	BB	AA	AA	BB	BB	AA	BB	AA	BB	AA	-	BB	AA	BB	AA	BB	BB	AA	AA	AA	AA	AA	BB	BB	BB	AA	BB	AA	AA	AA	BB	AA	BB	AA	AA	AA	BB	BB	AA	AA	AA	AA
IWA4011	wsnp_Ex_c4815_8597139	[T/C]	BB	AA	AA	BB	AA	AA	BB	BB	AA	BB	BB	BB	AA	AA	AA	BB	AA	BB	AA	BB	AA	AA	AA	AA	BB	BB	AA	AA	AA	BB	BB	BB	AA	AA	AA	AA	AA	BB	BB	BB	BB	AA	BB	AA	BB	AA	AA
IWA4018	wsnp_Ex_c4827_8612813	[A/C]	BB	AA	AA	-	AA	BB	BB	AA	BB	BB	BB	BB	BB	BB	AA	BB	BB	BB	BB	BB	BB	AA	AA	AA	BB	AA	AA	BB	AA	BB	AA	BB	AA	BB	AA	BB	AA	BB	AA	AA	AA	AA	BB	AA	AA	AA	AA
IWA4030	wsnp_Ex_c48670_53507714	[A/G]	BB	AA	AA	AA	BB	AA	AA	AA	AA	BB	BB	AA	BB	AA	BB	BB	AA	BB	BB	BB	BB	AA	AA	BB	AA	BB	AA	AA	AA	AA	BB	BB	AA	AA	-	AA	AA	AA	AA	AA	AA	BB	AA	AA	AA	BB	AA
IWA4032	wsnp_Ex_c48693_53524567	[T/C]	BB	AA	AA	AA	BB	-	BB	AA	-	BB	AA	-	BB	AA	BB	BB	AA	AA	-	BB	AA	BB	BB	AA	BB	AA	AA	BB	BB	BB	AA	BB	-	BB	BB	BB	-	AA	BB	BB	BB	AA	AA	BB	AA	AA	BB
IWA4139	wsnp_Ex_c5245_9283053	[T/C]	BB	AA	BB	BB	AA	BB	BB	BB	-	BB	BB	BB	BB	AA	AA	BB	AA	AA	AA	BB	BB	AA	BB	AA	BB	AA	AA	AA	AA	BB	BB	AA	BB	AA	AA	BB	BB	AA	-	BB	BB	AA	BB	AA	BB	BB	AA
IWA4186	wsnp_Ex_c53427_56668660	[A/C]	BB	AA	AA	AA	BB	-	BB	AA	-	BB	AA	-	BB	AA	BB	BB	AA	AA	-	BB	AA	BB	BB	AA	BB	AA	AA	BB	BB	BB	AA	BB	-	BB	BB	BB	-	AA	BB	BB	BB	AA	AA	BB	AA	AA	BB
IWA4203	wsnp_Ex_c53976_57027635	[T/C]	BB	AA	BB	BB	AA	BB	BB	BB	BB	BB	BB	BB	BB	AA	AA	BB	AA	AA	AA	BB	BB	AA	AA	BB	BB	AA	AA	AA	BB	BB	BB	AA	BB	AA	AA	BB	BB	AA	-	BB	BB	AA	BB	AA	BB	BB	AA
IWA4253	wsnp_Ex_c5492_9691241	[A/C]	BB	AA	AA	BB	AA	AA	BB	AA	AA	AA	AA	BB	-	BB	BB	BB	AA	BB	BB	AA	AA	AA	BB	BB	BB	BB	BB	BB	BB	BB	BB	AA	AA	BB	BB	BB	BB	AA	AA	BB	AA	BB	AA	BB	-	AA	AA
IWA4299	wsnp_Ex_c5626_9897389	[T/G]	BB	AA	AA	AA	BB	AA	BB	BB	BB	BB	AA	BB	BB	BB	AA	AA	BB	BB	BB	AA	AA	BB	BB	BB	AA	AA	BB	AA	BB	BB	BB	AA	BB	AA	BB	BB	-	AA	AA	AA	BB	AA	AA	AA	AA	BB	AA
IWA4300	wsnp_Ex_c5632_9904112	[A/C]	BB	AA	-	BB	-	BB	AA	AA	AA	-	AA	BB	BB	BB	BB	AA	AA	AA	AA	AA	BB	BB	AA	AA	BB	AA	BB	BB	BB	AA	AA	BB	BB	BB	BB	AA	BB	AA	-	AA	AA	BB	AA	BB	BB	AA	-
IWA4337	wsnp_Ex_c5744_10087758	[T/G]	BB	AA	BB	BB	AA	AA	BB	AA	AA	AA	BB	AA	AA	AA	AA	AA	AA	BB	AA	AA	AA	AA	AA	AA	AA	-	AA	AA	AA	AA	AA	AA	AA	AA	AA	AA	BB	BB	AA	BB	BB	BB	AA	AA	AA	AA	AA
IWA4407	wsnp_Ex_c60462_60905848	[T/C]	BB	AA	AA	BB	BB	AA	BB	AA	BB	BB	BB	AA	BB	BB	BB	BB	AA	AA	AA	BB	BB	AA	AA	BB	AA	AA	BB	BB	BB	BB	BB	AA	AA	BB	BB	BB	BB	BB	BB	-	AA	BB	AA	AA	BB	BB	BB
IWA4491	wsnp_Ex_c63909_62932437	[A/G]	BB	AA	AA	AA	AA	BB	AA	AA	AA	AA	BB	AA	AA	BB	AA	AA	BB	BB	AA	AA	BB	AA	BB	AA	-	AA	AA	BB	BB	BB	AA	AA	BB	AA	BB	AA	BB	BB	AA	AA	AA	AA	-	AA	BB	BB	AA
IWA4503	wsnp_Ex_c6401_11124940	[A/G]	BB	AA	AA	AA	AA	AA	BB	AA	AA	AA	BB	AA	AA	AA	AA	AA	AA	BB	AA	AA	AA	AA	AA	AA	AA	-	AA	AA	AA	AA	AA	AA	AA	AA	AA	AA	BB	AA	AA	AA	BB	AA	AA	AA	AA	AA	AA
IWA4556	wsnp_Ex_c6611_11451949	[T/C]	BB	AA	BB	BB	AA	BB	BB	BB	-	BB	-	BB	BB	AA	AA	BB	AA	AA	-	BB	BB	AA	AA	BB	BB	AA	AA	AA	BB	BB	BB	AA	BB	AA	AA	BB	BB	AA	-	BB	BB	AA	BB	AA	BB	BB	AA
IWA4610	wsnp_Ex_c702_1382859	[T/C]	BB	AA	AA	AA	AA	AA	AA	BB	AA	BB	BB	BB	AA	AA	AA	BB	-	BB	AA	AA	AA	BB	AA	BB	AA	BB	AA	AA	AA	-	BB	AA	AA	AA	AA	AA	AA	BB	BB	BB	AA	BB	BB	AA	BB	BB	AA
IWA4614	wsnp_Ex_c7030_12111917	[A/C]	BB	AA	AA	BB	BB	AA	AA	BB	AA	BB	AA	BB	BB	AA	BB	BB	AA	AA	BB	BB	AA	AA	BB	BB	BB	AA	BB	AA	BB	BB	AA	BB	AA	BB	BB	BB	-	AA	AA	BB	AA	AA	BB	AA	AA	AA	BB
IWA4621	wsnp_Ex_c7071_12171619	[A/G]	BB	AA	AA	AA	AA	BB	AA	AA	AA	AA	BB	AA	BB	BB	BB	BB	AA	AA	BB	BB	AA	BB	AA	AA	AA	-	AA	AA	AA	BB	AA	BB	AA	BB	BB	AA	BB	AA	AA	AA	BB	BB	AA	BB	BB	AA	BB
IWA4713	wsnp_Ex_c7684_13109335	[A/G]	BB	AA	AA	BB	BB	AA	BB	AA	AA	AA	AA	AA	AA	BB	AA	AA	BB	AA	AA	AA	AA	BB	AA	AA	BB	BB	BB	AA	AA	BB	AA	BB	AA	AA	AA	AA	AA	AA	BB	AA	AA	AA	AA	AA	AA	-	BB
IWA4730	wsnp_Ex_c7786_13265260	[A/G]	BB	AA	AA	AA	AA	AA	BB	BB	AA	AA	AA	BB	AA	AA	AA	BB	AA	BB	AA	BB	AA	AA	AA	AA	AA	BB	AA	AA	AA	AA	AA	BB	AA	AA	AA	AA	BB	-	BB	AA	BB	AA	BB	AA	BB	AA	AA
IWA4747	wsnp_Ex_c791_1557333	[T/C]	BB	AA	AA	AA	BB	BB	AA	-	-	AA	BB	AA	AA	BB	-	BB	AA	AA	BB	AA	AA	BB	AA	AA	BB	AA	BB	AA	AA	AA	BB	BB	BB	AA	BB	AA	AA	BB	BB	AA	AA	-	AA	BB	AA	AA	BB
IWA4765	wsnp_Ex_c807_1585614	[T/C]	BB	AA	BB	BB	BB	BB	BB	BB	BB	BB	BB	BB	AA	AA	-	BB	AA	BB	BB	BB	AA	BB	AA	BB	AA	BB	BB	AA	BB	BB	-	BB	BB	AA	BB	BB	AA	AA	BB	BB	BB	BB	AA	AA	BB	BB	AA
IWA4793	wsnp_Ex_c8322_14030310	[T/G]	BB	AA	AA	AA	AA	BB	AA	BB	AA	AA	BB	AA	BB	AA	BB	AA	AA	AA	AA	AA	AA	AA	BB	BB	BB	BB	BB	BB	BB	BB	AA	AA	BB	BB	BB	BB	BB	BB	BB	BB	AA	AA	AA	BB	BB	AA	AA
IWA4820	wsnp_Ex_c8633_14477407	[T/C]	BB	AA	AA	AA	BB	-	AA	BB	AA	AA	BB	AA	BB	AA	BB	AA	AA	AA	-	AA	AA	AA	BB	BB	BB	BB	BB	AA	BB	BB	AA	AA	BB	BB	BB	AA	BB	BB	BB	AA	AA	AA	AA	BB	BB	AA	BB
IWA4897	wsnp_Ex_c9343_15514531	[T/C]	BB	AA	AA	BB	BB	AA	BB	AA	AA	BB	AA	AA	BB	BB	AA	AA	BB	AA	AA	AA	AA	BB	-	AA	BB	BB	BB	AA	AA	BB	AA	BB	AA	AA	BB	BB	AA	AA	BB	AA	AA	AA	AA	AA	AA	-	AA
IWA5007	wsnp_Ex_rep_c101342_86720058	[T/C]	BB	AA	AA	BB	BB	AA	BB	BB	AA	BB	BB	AA	AA	BB	AA	BB	BB	BB	BB	AA	AA	AA	AA	BB	BB	BB	BB	BB	BB	AA	-	AA	BB	AA	BB	BB	BB	BB	AA	AA	AA	AA	BB	AA	BB	AA	AA
IWA5031	wsnp_Ex_rep_c101746_87053634	[A/C]	BB	AA	AA	BB	BB	AA	AA	AA	BB	BB	AA	-	-	BB	BB	BB	BB	AA	AA	AA	AA	-	BB	BB	BB	AA	AA	BB	AA	AA	BB	BB	AA	AA	AA	AA	AA	-	AA	AA	AA	BB	-	AA	BB	AA	BB
IWA5066	wsnp_Ex_rep_c102390_87572532	[T/C]	BB	AA	BB	BB	BB	AA	BB	BB	AA	AA	BB	AA	AA	AA	AA	BB	BB	AA	BB	AA	AA	AA	AA	BB	BB	BB	BB	BB	BB	BB	AA	AA	BB	BB	AA	BB	BB	BB	AA	-	AA	AA	AA	AA	BB	AA	AA
IWA5079	wsnp_Ex_rep_c103024_88075650	[T/G]	BB	AA	BB	BB	BB	BB	AA	AA	AA	BB	AA	BB	BB	BB	BB	AA	AA	AA	AA	AA	BB	AA	AA	AA	BB	AA	BB	BB	BB	AA	AA	BB	BB	BB	BB	AA	BB	AA	-	AA	AA	BB	AA	BB	BB	AA	-
IWA5195	wsnp_Ex_rep_c66285_64443309	[A/G]	BB	AA	BB	BB	AA	BB	BB	AA	-	-	AA	BB	AA	AA	BB	AA	-	AA	BB	-	AA	BB	-	-	AA	AA	AA	BB	BB	AA	AA	AA	AA	AA	AA	-	BB	BB	BB	BB	AA	AA	BB	-	BB	AA	AA
IWA5212	wsnp_Ex_rep_c66357_64540369	[T/G]	BB	AA	-	BB	BB	BB	BB	AA	AA	BB	BB	AA	AA	BB	AA	AA	BB	BB	BB	BB	BB	BB	BB	BB	AA	AA	AA	AA	BB	AA	BB	AA	AA	BB	BB	BB	BB	BB	AA	BB	AA	AA	AA	AA	BB	BB	AA
IWA5213	wsnp_Ex_rep_c66357_64540428	[A/G]	BB	AA	-	BB	BB	BB	BB	AA	AA	BB	BB	AA	AA	BB	AA	AA	BB	BB	BB	BB	BB	-	BB	BB	AA	AA	AA	AA	BB	AA	BB	AA	AA	BB	BB	BB	BB	BB	AA	BB	AA	AA	AA	AA	BB	BB	AA
IWA5299	wsnp_Ex_rep_c66766_65123941	[T/C]	BB	AA	BB	AA	AA	BB	AA	AA	BB	BB	BB	AA	BB	BB	AA	BB	BB	AA	BB	BB	AA	AA	BB	BB	BB	BB	AA	AA	AA	BB	BB	AA	BB	AA	BB	BB	BB	BB	-	BB	BB	AA	AA	BB	BB	BB	AA
IWA5327	wsnp_Ex_rep_c66900_65314012	[T/C]	BB	AA	AA	-	AA	AA	BB	BB	AA	BB	BB	BB	BB	BB	BB	AA	AA	AA	BB	BB	AA	BB	BB	BB	AA	BB	BB	AA	BB	AA	BB	AA	AA	AA	BB	BB	AA	AA	BB	AA	BB	BB	AA	AA	AA	BB	AA
IWA5340	wsnp_Ex_rep_c66982_65423289	[T/C]	BB	AA	AA	BB	BB	AA	AA	AA	-	AA	BB	AA	AA	-	BB	BB	AA	AA	AA	BB	BB	AA	BB	AA	AA	AA	AA	AA	BB	AA	AA	AA	BB	AA	AA	BB	AA	BB	BB	-	AA	BB	AA	BB	AA	BB	BB
IWA5346	wsnp_Ex_rep_c67012_65465394	[A/G]	BB	AA	AA	-	AA	AA	BB	AA	AA	AA	AA	AA	AA	AA	AA	AA	AA	BB	AA	AA	AA	AA	AA	AA	AA	-	AA	AA	AA	-	AA	-	AA	AA	AA	AA	BB	AA	AA	AA	BB	AA	AA	AA	-	AA	AA
IWA5408	wsnp_Ex_rep_c67510_66116823	[T/C]	BB	AA	BB	AA	AA	BB	BB	BB	AA	BB	AA	AA	AA	AA	BB	AA	BB	BB	BB	AA	AA	BB	BB	AA	AA	AA	AA	AA	BB	BB	AA	AA	AA	AA	AA	BB	AA	-	BB	BB	AA	AA	BB	BB	BB	AA	BB
IWA5414	wsnp_Ex_rep_c67561_66189279	[T/G]	BB	AA	AA	BB	AA	BB	BB	BB	BB	BB	BB	AA	AA	BB	-	BB	AA	BB	AA	BB	-	AA	BB	BB	BB	BB	BB	AA	BB	BB	-	AA	BB	BB	AA	BB	AA	AA	BB	BB	-	BB	BB	BB	BB	AA	AA
IWA5424	wsnp_Ex_rep_c67619_66272272	[T/G]	BB	AA	AA	BB	BB	AA	AA	AA	-	AA	BB	AA	AA	-	BB	BB	AA	-	AA	BB	BB	AA	BB	AA	AA	AA	AA	-	BB	AA	AA	AA	BB	AA	-	BB	AA	BB	BB	-	AA	BB	AA	BB	AA	BB	BB
IWA5502	wsnp_Ex_rep_c68165_66935041	[T/G]	BB	AA	AA	BB	BB	AA	AA	AA	AA	BB	BB	BB	BB	BB	BB	AA	BB	AA	BB	BB	AA	AA	AA	BB	AA	BB	AA	BB	BB	AA	BB	AA	BB	BB	BB	BB	AA	-	BB	BB	AA	BB	BB	BB	AA	AA	BB
IWA5504	wsnp_Ex_rep_c68169_66940235	[T/C]	BB	AA	AA	-	AA	AA	BB	AA	AA	AA	AA	AA	AA	AA	AA	AA	AA	BB	AA	AA	AA	AA	AA	AA	AA	-	AA	AA	AA	-	AA	-	AA	AA	AA	AA	BB	AA	AA	AA	BB	AA	AA	AA	-	AA	AA
IWA5539	wsnp_Ex_rep_c68515_67349904	[A/G]	BB	AA	AA	BB	AA	AA	AA	-	AA	-	BB	BB	BB	AA	BB	AA	AA	AA	BB	BB	AA	BB	BB	BB	-	BB	BB	AA	BB	AA	BB	AA	BB	BB	BB	BB	AA	AA	-	AA	BB	BB	BB	AA	BB	BB	AA
IWA5554	wsnp_Ex_rep_c68623_67474885	[A/G]	BB	AA	BB	BB	AA	BB	AA	BB	AA	BB	BB	AA	AA	BB	AA	BB	BB	AA	BB	AA	AA	AA	BB	BB	AA	-	AA	AA	AA	BB	AA	AA	AA	BB	AA	AA	AA	BB	BB	AA	AA	-	BB	BB	AA	AA	BB
IWA5555	wsnp_Ex_rep_c68623_67474935	[T/C]	BB	AA	BB	BB	AA	BB	AA	BB	AA	BB	BB	-	AA	BB	AA	BB	BB	AA	BB	AA	AA	AA	BB	BB	-	-	AA	AA	AA	BB	AA	AA	AA	BB	AA	AA	AA	BB	BB	AA	AA	-	BB	BB	AA	AA	BB
IWA5649	wsnp_Ex_rep_c69864_68823765	[A/G]	BB	AA	AA	BB	AA	AA	BB	AA	AA	BB	AA	-	AA	BB	AA	AA	BB	BB	BB	BB	BB	BB	BB	AA	BB	AA	BB	AA	BB	BB	AA	AA	BB	AA	AA	BB	AA	AA	AA	BB	BB	-	BB	BB	-	AA	AA
IWA5729	wsnp_Ex_rep_c71305_70087742	[T/C]	BB	AA	AA	BB	AA	AA	BB	AA	AA	AA	AA	BB	-	BB	-	BB	AA	BB	BB	-	AA	AA	BB	BB	BB	BB	BB	BB	BB	BB	BB	AA	AA	BB	BB	-	BB	AA	AA	BB	AA	BB	-	BB	-	AA	AA
IWA5747	wsnp_Ex_rep_c76495_73453891	[T/C]	BB	AA	AA	AA	BB	BB	AA	-	AA	AA	BB	AA	AA	BB	-	BB	AA	AA	BB	AA	AA	BB	AA	AA	BB	AA	BB	AA	AA	BB	BB	BB	BB	AA	BB	AA	AA	BB	BB	AA	AA	BB	AA	BB	AA	AA	BB
IWA5774	wsnp_JD_c10515_11167103	[T/C]	BB	AA	BB	BB	AA	BB	BB	AA	-	-	AA	BB	AA	AA	BB	AA	-	AA	BB	-	AA	BB	-	-	AA	AA	AA	BB	BB	AA	AA	AA	AA	AA	AA	-	BB	BB	BB	BB	AA	AA	BB	-	BB	AA	AA
IWA5806	wsnp_JD_c12333_12595897	[T/C]	BB	AA	-	BB	BB	AA	BB	-	AA	BB	AA	AA	BB	AA	AA	AA	BB	AA	AA	AA	AA	BB	BB	AA	BB	BB	BB	BB	AA	-	AA	BB	AA	AA	BB	AA	AA	AA	BB	AA	AA	AA	BB	AA	AA	-	AA
IWA5840	wsnp_JD_c13946_13810300	[A/G]	BB	AA	AA	BB	BB	AA	BB	BB	AA	BB	BB	AA	AA	BB	AA	BB	BB	BB	BB	AA	AA	AA	AA	BB	BB	BB	BB	BB	BB	AA	AA	AA	BB	AA	BB	BB	BB	BB	AA	AA	AA	AA	BB	AA	BB	AA	AA
IWA5851	wsnp_JD_c14769_14413046	[A/G]	BB	AA	AA	BB	AA	AA	BB	AA	AA	AA	AA	BB	-	BB	-	BB	AA	BB	BB	-	AA	AA	BB	BB	BB	BB	BB	BB	BB	BB	BB	AA	AA	BB	BB	-	BB	AA	AA	BB	AA	BB	-	BB	-	AA	AA
IWA5861	wsnp_JD_c1544_2179305	[T/C]	BB	AA	AA	BB	AA	BB	AA	AA	AA	AA	AA	BB	BB	AA	AA	BB	BB	BB	AA	BB	AA	BB	-	AA	BB	AA	AA	AA	BB	-	BB	AA	BB	AA	AA	BB	BB	AA	-	BB	AA	AA	BB	AA	BB	BB	AA
IWA5869	wsnp_JD_c15974_15272598	[A/G]	BB	AA	AA	AA	AA	AA	AA	-	AA	-	AA	AA	AA	AA	AA	-	BB	AA	BB	BB	AA	AA	AA	BB	BB	BB	BB	AA	AA	AA	BB	AA	BB	AA	AA	BB	AA	AA	BB	AA	AA	AA	AA	AA	BB	BB	BB
IWA5871	wsnp_JD_c16245_15468917	[A/G]	BB	AA	BB	AA	AA	AA	AA	-	AA	AA	AA	AA	AA	BB	AA	AA	AA	AA	BB	BB	AA	BB	AA	BB	-	BB	AA	BB	AA	-	AA	AA	BB	AA	AA	BB	AA	AA	BB	AA	AA	AA	-	BB	BB	BB	BB
IWA5886	wsnp_JD_c1816_2522844	[A/G]	BB	AA	-	AA	AA	AA	AA	-	-	-	AA	-	-	AA	AA	-	BB	AA	AA	BB	AA	AA	AA	BB	BB	BB	BB	AA	AA	AA	BB	AA	BB	AA	AA	BB	AA	AA	BB	AA	AA	AA	AA	AA	BB	BB	BB
IWA5929	wsnp_JD_c21776_19013462	[A/G]	BB	AA	AA	BB	AA	BB	AA	AA	BB	AA	AA	AA	AA	AA	BB	AA	BB	AA	BB	BB	AA	BB	AA	AA	AA	BB	AA	AA	BB	AA	BB	AA	BB	AA	AA	BB	AA	AA	BB	AA	BB	BB	BB	AA	BB	AA	BB
IWA5980	wsnp_JD_c29019_23208078	[A/G]	BB	AA	-	BB	BB	BB	BB	AA	AA	BB	BB	AA	AA	BB	AA	AA	BB	BB	BB	BB	BB	-	BB	BB	AA	AA	AA	AA	BB	AA	BB	AA	AA	BB	BB	BB	BB	BB	AA	BB	AA	AA	AA	AA	BB	BB	AA
IWA6137	wsnp_JD_c64_103934	[A/G]	BB	AA	-	AA	AA	AA	BB	BB	AA	AA	AA	AA	AA	BB	AA	AA	AA	BB	AA	BB	AA	BB	AA	AA	BB	BB	BB	AA	AA	BB	AA	AA	BB	AA	BB	AA	-	BB	BB	AA	AA	BB	BB	BB	BB	AA	BB
IWA6182	wsnp_JD_c7795_8868122	[T/C]	BB	AA	AA	AA	BB	BB	AA	BB	AA	AA	BB	AA	AA	BB	-	BB	AA	AA	BB	AA	AA	BB	-	AA	BB	AA	BB	AA	BB	BB	BB	BB	BB	AA	BB	AA	AA	BB	BB	AA	AA	BB	AA	BB	-	AA	BB
IWA6210	wsnp_JD_c8926_9848514	[A/G]	BB	AA	BB	BB	BB	BB	-	BB	-	BB	BB	BB	BB	AA	AA	BB	AA	AA	-	BB	BB	AA	AA	BB	BB	AA	AA	AA	BB	BB	BB	AA	BB	AA	AA	BB	BB	AA	AA	BB	BB	BB	BB	AA	BB	BB	AA
IWA6313	wsnp_JD_rep_c65181_41511534	[A/G]	BB	AA	AA	-	BB	BB	AA	AA	BB	BB	AA	BB	AA	BB	AA	-	BB	AA	BB	AA	BB	BB	AA	BB	AA	AA	AA	AA	BB	BB	AA	AA	AA	AA	AA	BB	AA	BB	AA	AA	AA	BB	BB	AA	AA	AA	AA
IWA6331	wsnp_JG_c227_167774	[A/G]	BB	AA	AA	BB	BB	-	BB	AA	-	BB	AA	-	BB	AA	BB	BB	AA	AA	-	BB	AA	BB	BB	BB	BB	AA	AA	BB	BB	BB	AA	BB	-	AA	BB	BB	-	AA	BB	BB	BB	BB	AA	BB	AA	AA	BB
IWA6458	wsnp_Ku_c12441_20092792	[T/C]	BB	AA	AA	BB	BB	AA	BB	AA	AA	BB	AA	AA	BB	BB	AA	AA	BB	AA	AA	AA	AA	BB	BB	AA	BB	BB	BB	AA	AA	BB	AA	BB	AA	AA	BB	BB	AA	AA	BB	AA	AA	AA	AA	AA	AA	-	AA
IWA6481	wsnp_Ku_c13068_20937906	[T/C]	BB	AA	AA	BB	BB	AA	AA	AA	-	AA	BB	AA	AA	-	BB	BB	AA	-	AA	BB	BB	AA	BB	AA	AA	AA	AA	-	BB	AA	AA	AA	BB	AA	-	BB	AA	BB	BB	-	AA	BB	AA	BB	AA	BB	BB
IWA6568	wsnp_Ku_c15630_24304954	[A/G]	BB	AA	-	BB	-	BB	AA	AA	AA	-	AA	BB	BB	BB	BB	AA	AA	AA	AA	AA	BB	BB	AA	AA	BB	AA	BB	BB	BB	AA	AA	BB	BB	BB	BB	AA	BB	AA	-	AA	AA	BB	AA	BB	BB	AA	-
IWA6597	wsnp_Ku_c16481_25377573	[A/G]	BB	AA	AA	BB	AA	AA	BB	AA	AA	AA	AA	BB	-	BB	-	BB	AA	BB	BB	-	AA	AA	BB	BB	BB	BB	BB	BB	BB	BB	BB	AA	AA	BB	BB	-	BB	AA	AA	BB	AA	BB	-	BB	-	AA	AA
IWA6724	wsnp_Ku_c22358_32187765	[A/G]	BB	AA	BB	BB	AA	BB	BB	BB	BB	AA	BB	BB	BB	BB	BB	AA	BB	AA	BB	BB	AA	BB	AA	BB	AA	BB	AA	BB	AA	AA	AA	BB	AA	BB	AA	BB	-	BB	AA	BB	BB	-	BB	BB	AA	BB	AA
IWA6756	wsnp_Ku_c24239_34199356	[A/G]	BB	AA	AA	BB	BB	BB	AA	AA	BB	BB	-	BB	BB	AA	BB	BB	BB	AA	AA	AA	-	-	BB	BB	BB	AA	AA	BB	AA	AA	BB	AA	AA	AA	AA	AA	BB	BB	BB	-	AA	BB	-	BB	BB	AA	BB
IWA6758	wsnp_Ku_c24323_34285350	[A/G]	BB	AA	BB	BB	BB	BB	BB	BB	AA	BB	-	BB	BB	AA	AA	BB	AA	AA	AA	BB	BB	AA	AA	BB	BB	AA	AA	AA	BB	BB	BB	AA	BB	AA	AA	BB	BB	AA	-	BB	BB	BB	BB	AA	BB	BB	AA
IWA6779	wsnp_Ku_c25613_35580381	[A/G]	BB	AA	AA	AA	BB	AA	AA	BB	BB	BB	AA	AA	BB	AA	AA	AA	AA	AA	-	AA	AA	AA	BB	-	BB	BB	BB	BB	BB	BB	AA	AA	BB	BB	BB	AA	BB	BB	BB	AA	AA	AA	AA	AA	BB	AA	BB
IWA6794	wsnp_Ku_c26257_36216976	[T/C]	BB	AA	-	AA	AA	AA	AA	-	-	-	AA	-	-	AA	AA	-	BB	AA	AA	BB	AA	AA	AA	BB	BB	BB	BB	AA	AA	AA	BB	AA	BB	AA	AA	BB	AA	AA	BB	AA	AA	AA	AA	AA	BB	BB	BB
IWA6797	wsnp_Ku_c26323_36285601	[A/G]	BB	AA	AA	BB	BB	AA	-	BB	AA	BB	BB	-	AA	BB	AA	BB	BB	BB	BB	AA	BB	AA	AA	BB	BB	BB	BB	BB	BB	AA	AA	AA	BB	AA	BB	BB	BB	BB	AA	AA	AA	AA	BB	AA	BB	AA	AA
IWA6827	wsnp_Ku_c27456_37405672	[A/G]	BB	AA	BB	BB	AA	BB	BB	AA	-	-	AA	BB	AA	AA	BB	AA	-	AA	BB	-	AA	BB	-	-	AA	AA	AA	AA	BB	AA	AA	AA	AA	AA	AA	-	BB	BB	BB	BB	AA	AA	BB	-	BB	AA	AA
IWA6895	wsnp_Ku_c3102_5811860	[T/C]	BB	AA	BB	BB	AA	BB	AA	BB	AA	AA	BB	AA	BB	AA	BB	AA	AA	AA	BB	AA	BB	AA	BB	-	BB	BB	BB	-	BB	BB	AA	AA	BB	BB	-	AA	BB	BB	BB	BB	AA	BB	AA	BB	BB	AA	AA
IWA6940	wsnp_Ku_c34643_43968242	[T/C]	BB	AA	AA	AA	AA	BB	AA	AA	BB	AA	AA	-	BB	BB	BB	BB	AA	BB	BB	BB	AA	BB	BB	AA	AA	-	AA	BB	AA	BB	AA	BB	AA	BB	BB	AA	AA	AA	AA	AA	BB	BB	AA	BB	AA	AA	BB
IWA6945	wsnp_Ku_c34980_44256215	[A/G]	BB	AA	BB	BB	AA	BB	BB	BB	-	BB	-	BB	BB	AA	AA	BB	AA	AA	AA	BB	BB	AA	BB	AA	BB	AA	AA	AA	AA	BB	BB	AA	BB	AA	AA	BB	BB	AA	-	BB	BB	AA	BB	AA	BB	BB	AA
IWA6953	wsnp_Ku_c35839_44981841	[T/C]	BB	AA	AA	-	AA	AA	BB	BB	AA	BB	BB	BB	AA	AA	AA	BB	AA	BB	AA	BB	AA	AA	AA	AA	AA	BB	AA	AA	AA	AA	AA	BB	AA	AA	AA	AA	BB	-	BB	AA	BB	AA	BB	AA	BB	AA	AA
IWA7106	wsnp_Ku_c48_103915	[A/G]	BB	AA	BB	BB	AA	BB	AA	BB	AA	BB	BB	AA	AA	BB	AA	BB	BB	AA	BB	AA	AA	AA	BB	BB	AA	-	AA	AA	AA	BB	AA	AA	AA	BB	AA	AA	AA	BB	BB	AA	AA	-	BB	BB	AA	AA	BB
IWA7135	wsnp_Ku_c51039_56457361	[T/C]	BB	AA	BB	AA	BB	AA	BB	BB	BB	BB	AA	BB	BB	BB	AA	AA	BB	BB	AA	AA	AA	BB	BB	BB	AA	AA	BB	AA	BB	AA	BB	AA	BB	AA	BB	BB	-	AA	AA	AA	BB	AA	AA	AA	AA	BB	AA
IWA7190	wsnp_Ku_c5745_10169129	[A/G]	BB	AA	AA	BB	AA	BB	BB	BB	AA	AA	AA	BB	AA	AA	BB	BB	BB	BB	BB	AA	BB	BB	AA	AA	AA	AA	BB	BB	AA	AA	BB	BB	AA	BB	BB	BB	AA	AA	AA	AA	AA	AA	AA	AA	AA	BB	AA
IWA7197	wsnp_Ku_c5874_10384800	[A/G]	BB	AA	AA	AA	BB	AA	AA	AA	AA	BB	BB	AA	BB	AA	BB	BB	AA	BB	BB	BB	BB	AA	AA	BB	AA	BB	AA	AA	AA	AA	BB	BB	AA	AA	-	AA	AA	AA	AA	AA	BB	BB	AA	AA	AA	BB	AA
IWA7225	wsnp_Ku_c6430_11257008	[A/G]	BB	AA	BB	AA	AA	AA	AA	-	AA	AA	AA	AA	AA	AA	AA	-	AA	AA	BB	BB	AA	-	AA	BB	AA	BB	BB	AA	AA	AA	BB	AA	BB	AA	AA	BB	AA	AA	BB	AA	AA	AA	AA	AA	BB	BB	BB
IWA7230	wsnp_Ku_c6602_11531957	[T/C]	BB	AA	BB	AA	AA	BB	AA	AA	BB	BB	BB	AA	BB	BB	AA	BB	BB	AA	BB	BB	AA	AA	BB	BB	BB	BB	AA	AA	AA	BB	BB	AA	BB	AA	BB	BB	BB	BB	-	BB	BB	AA	AA	BB	BB	BB	AA
IWA7233	wsnp_Ku_c665_1371448	[A/G]	BB	AA	AA	-	AA	BB	BB	AA	BB	BB	BB	BB	BB	BB	AA	-	BB	BB	BB	BB	BB	AA	AA	AA	BB	AA	AA	BB	AA	BB	AA	BB	AA	BB	AA	BB	AA	BB	AA	AA	AA	AA	BB	AA	AA	AA	AA
IWA7270	wsnp_Ku_c7197_12439299	[T/C]	BB	AA	AA	BB	AA	AA	BB	AA	AA	AA	AA	BB	-	BB	-	BB	AA	BB	BB	-	AA	AA	BB	BB	BB	BB	BB	BB	BB	BB	BB	AA	AA	BB	BB	-	BB	AA	AA	BB	AA	BB	-	BB	-	AA	AA
IWA7321	wsnp_Ku_c8358_14210991	[A/G]	BB	AA	AA	BB	AA	AA	AA	BB	AA	BB	AA	AA	BB	AA	BB	AA	BB	BB	AA	AA	BB	AA	BB	AA	AA	BB	BB	AA	AA	BB	BB	AA	AA	BB	BB	BB	AA	AA	BB	BB	AA	AA	BB	BB	AA	AA	AA
IWA7399	wsnp_Ku_rep_c103074_89905152	[A/G]	BB	AA	AA	-	BB	BB	AA	BB	AA	BB	-	-	BB	AA	BB	AA	AA	AA	AA	-	BB	-	AA	BB	BB	AA	AA	BB	-	AA	-	AA	BB	AA	AA	BB	-	BB	BB	BB	-	AA	BB	AA	BB	AA	AA
IWA7516	wsnp_Ku_rep_c72821_72480395	[A/G]	BB	AA	AA	AA	AA	AA	AA	-	AA	AA	AA	AA	AA	AA	AA	-	AA	AA	BB	BB	AA	-	AA	BB	BB	BB	BB	AA	AA	AA	BB	AA	BB	AA	AA	BB	AA	AA	BB	AA	AA	AA	AA	AA	BB	BB	BB
IWA7600	wsnp_Ra_c1303_2598907	[A/G]	BB	AA	BB	AA	AA	BB	AA	-	BB	AA	AA	-	AA	BB	BB	BB	AA	BB	BB	BB	AA	BB	BB	AA	AA	AA	AA	BB	AA	BB	AA	AA	AA	BB	BB	BB	AA	AA	BB	AA	BB	BB	AA	BB	AA	AA	BB
IWA7700	wsnp_Ra_c19148_28288923	[A/G]	BB	AA	BB	BB	AA	BB	BB	BB	-	BB	-	BB	BB	AA	AA	BB	AA	AA	-	BB	BB	AA	AA	BB	BB	AA	AA	AA	BB	BB	BB	AA	BB	AA	AA	BB	BB	AA	-	BB	BB	AA	BB	AA	BB	BB	AA
IWA7761	wsnp_Ra_c22610_32088836	[T/G]	BB	AA	AA	BB	BB	AA	BB	BB	AA	BB	BB	AA	AA	BB	AA	BB	BB	BB	BB	AA	AA	AA	AA	BB	BB	BB	BB	BB	BB	AA	-	AA	BB	AA	BB	BB	BB	BB	AA	AA	AA	AA	BB	AA	BB	AA	AA
IWA7765	wsnp_Ra_c22775_32274079	[T/C]	BB	AA	AA	AA	BB	AA	AA	AA	AA	BB	BB	AA	BB	BB	BB	BB	AA	BB	BB	BB	BB	AA	AA	BB	BB	-	AA	AA	AA	AA	BB	BB	AA	AA	-	AA	AA	-	AA	AA	AA	BB	AA	AA	AA	BB	AA
IWA7780	wsnp_Ra_c2479_4759322	[A/G]	BB	AA	BB	-	AA	BB	BB	BB	BB	AA	AA	BB	AA	AA	BB	BB	BB	BB	BB	AA	BB	AA	AA	AA	AA	AA	BB	AA	AA	BB	BB	BB	BB	BB	BB	BB	AA	BB	AA	AA	AA	AA	AA	AA	AA	BB	BB
IWA7789	wsnp_Ra_c25624_35192195	[T/C]	BB	AA	AA	-	AA	BB	AA	AA	BB	AA	AA	AA	AA	BB	BB	-	BB	AA	BB	-	AA	BB	BB	AA	AA	AA	AA	AA	BB	AA	BB	AA	BB	AA	AA	BB	AA	AA	BB	-	BB	BB	BB	AA	BB	AA	BB
IWA7841	wsnp_Ra_c30621_39857295	[A/G]	BB	AA	-	AA	AA	-	-	BB	AA	BB	BB	BB	AA	AA	AA	BB	BB	BB	AA	AA	AA	BB	-	BB	-	BB	-	AA	AA	BB	BB	AA	AA	AA	-	-	AA	BB	BB	BB	-	BB	BB	-	BB	BB	AA
IWA7905	wsnp_Ra_c38981_46788555	[T/C]	BB	AA	-	AA	AA	AA	AA	-	-	-	AA	-	-	AA	AA	-	BB	AA	AA	BB	AA	AA	AA	BB	BB	BB	BB	AA	AA	AA	BB	AA	BB	AA	AA	BB	AA	AA	BB	AA	AA	AA	AA	AA	BB	BB	BB
IWA7907	wsnp_Ra_c39394_47110214	[A/C]	BB	AA	BB	-	AA	BB	BB	BB	BB	AA	AA	BB	AA	AA	BB	BB	BB	BB	BB	AA	BB	AA	AA	BB	AA	AA	BB	AA	AA	BB	BB	BB	BB	BB	BB	BB	AA	BB	AA	AA	AA	AA	AA	AA	AA	BB	BB
IWA7933	wsnp_Ra_c42862_49716715	[A/G]	BB	AA	AA	AA	AA	BB	AA	AA	BB	AA	BB	-	BB	BB	BB	BB	AA	BB	BB	BB	BB	BB	BB	AA	AA	-	AA	AA	AA	BB	AA	BB	AA	BB	BB	AA	BB	AA	AA	AA	BB	BB	AA	BB	AA	AA	BB
IWA8070	wsnp_Ra_c7818_13376644	[T/G]	BB	AA	AA	BB	BB	AA	AA	AA	BB	BB	-	-	BB	BB	BB	BB	BB	AA	AA	AA	-	-	BB	BB	BB	AA	AA	BB	AA	AA	BB	AA	AA	AA	AA	AA	BB	BB	BB	-	AA	BB	-	BB	BB	AA	BB
IWA8072	wsnp_Ra_c7889_13482164	[A/G]	BB	AA	AA	AA	AA	-	AA	AA	AA	AA	AA	-	BB	BB	AA	AA	AA	AA	AA	BB	AA	AA	AA	AA	AA	AA	AA	AA	AA	BB	AA	-	BB	AA	BB	AA	BB	BB	AA	BB	AA	BB	BB	BB	BB	AA	BB
IWA8106	wsnp_Ra_c9738_16174002	[T/C]	BB	AA	AA	BB	-	BB	BB	BB	BB	BB	BB	BB	BB	BB	BB	BB	AA	BB	AA	AA	AA	AA	AA	AA	AA	AA	BB	AA	BB	BB	BB	BB	AA	BB	BB	BB	AA	AA	AA	AA	AA	BB	BB	AA	AA	AA	AA
IWA8141	wsnp_Ra_rep_c109853_92677055	[A/G]	BB	AA	AA	BB	AA	BB	BB	BB	BB	BB	BB	AA	AA	BB	-	BB	-	BB	BB	BB	-	AA	BB	BB	BB	BB	BB	AA	BB	BB	-	AA	BB	BB	AA	BB	AA	AA	BB	BB	AA	BB	BB	BB	BB	AA	AA
IWA8336	wsnp_RFL_Contig2424_1966870	[A/G]	BB	AA	AA	AA	BB	BB	BB	BB	AA	BB	BB	BB	BB	-	BB	BB	-	BB	BB	BB	AA	AA	BB	BB	AA	AA	BB	BB	BB	AA	AA	AA	BB	BB	BB	BB	AA	AA	BB	AA	AA	BB	BB	BB	AA	AA	BB
IWA8343	wsnp_RFL_Contig2504_2093982	[T/G]	BB	AA	BB	BB	-	BB	AA	AA	-	BB	AA	BB	BB	BB	BB	AA	AA	AA	AA	AA	BB	BB	BB	AA	BB	AA	BB	BB	BB	AA	AA	BB	BB	BB	BB	AA	BB	AA	-	AA	AA	BB	AA	AA	BB	AA	AA
IWA8414	wsnp_RFL_Contig30_2884966	[A/G]	BB	AA	AA	BB	AA	AA	BB	AA	AA	AA	AA	BB	AA	BB	-	BB	AA	BB	BB	AA	AA	AA	BB	BB	BB	BB	BB	BB	BB	BB	BB	AA	AA	BB	BB	-	BB	AA	AA	BB	AA	BB	AA	BB	-	AA	AA
IWA8585	wsnp_RFL_Contig4353_5066954	[A/G]	BB	AA	BB	BB	AA	BB	BB	BB	BB	AA	BB	BB	BB	BB	BB	AA	BB	AA	BB	BB	AA	BB	AA	BB	AA	BB	AA	BB	AA	AA	AA	BB	AA	BB	AA	BB	-	BB	AA	BB	BB	-	-	BB	AA	BB	AA
IWA8588	wsnp_RFL_Contig44_5147697	[A/C]	BB	AA	BB	AA	BB	AA	BB	BB	BB	BB	AA	BB	BB	BB	AA	AA	BB	BB	AA	AA	AA	BB	BB	BB	AA	AA	BB	AA	BB	AA	BB	AA	BB	AA	BB	BB	-	AA	AA	AA	BB	AA	AA	AA	AA	BB	AA
IWA8604	wsnp_RFL_Contig4574_5416228	[T/C]	BB	AA	-	-	-	BB	AA	AA	AA	-	AA	BB	BB	BB	BB	AA	AA	AA	AA	AA	BB	BB	AA	AA	BB	AA	BB	BB	BB	AA	AA	-	BB	BB	BB	AA	BB	AA	-	AA	AA	BB	AA	BB	BB	AA	-
[truncated: 135 more columns]
